# Supplementary material for: Uncovering a Genetic Polymorphism Located in Huntingtin Associated Protein 1 in Modulation of Central Pain Sensitization Signaling Pathways
Source: Front Neurosci. 2022 Jun 28;16:807773. doi: 10.3389/fnins.2022.807773 (PMC9274135; doi:10.3389/fnins.2022.807773)
Supplement: Supplementary file 1 [file Data_Sheet_1.XLSX]

## Sheet: Suppl. material 1
Supplementary Data S1: List custom SNPs related to FMS and central sensitization
Locus_Name	Sequence	Genome_Build_Version	Chromosome	Coordinate	Gene_Symbol	Location
rs191501191	GCAGCCGCCGGCACATAGGAGGGGTAGGTGGGGATGGGGTGGTGTGTAGCAGGCTGGGTG[T/C]CCATAGTAGCTAGGCCTGGGCGCAGGGGACTGCCACTTTCCATCTTCATGCTCTCCGTCA	37.5	3	128204731	GATA2	EXON
rs75453167	GGGAGATGTGGGTGGGGGCTGAGGTGGAGAGTAGAGGGGTTGGCAGTGTG[T/C]GGGTTTGGCAAAGCATCACGACCATCTTTGGGGTTCAAGTTCATTGACAT	37.5	8	11280466	FAM167A/C8orf12	EXON
rs35079193	TGTCACTGACGGAGAGCATGAAGATGGAAAGTGGCAGTCCCCTGCGCCCAGGCCTAGCTA[A/C]TATGGGCACCCAGCCTGCTACACACCACCCCATCCCCACCTACCCCTCCTATGTGCCGGC	37.5	3	128204737	GATA2	EXON
rs187833051	ATTTCCAGTTCCTTGATGAAGAGAAGTTACGAGACTGGGCATCCTTGCTTTGTTCCTAAA[T/C]AGGAGGTGAAAACATTCAGTCTTCTGCCATTAGGTATGATGTTAGCTCTGGATTTTTTAC	37.5	8	11258641	C8orf12	EXON
rs376780387	CTTGGTCTTAGGAAGCCCACCTCAATGTTTTCCAGATTTTTACCTCTTTTGGTGATAGTA[T/C]AGAAATGTAATCTTCATATATCATCCTAGCCTTTTCTTCAATTACTTTTTTGTTCTGCTC	37.5	6	153345414	RGS17	EXON
rs200867052	CCTTCCCCTCCCCAGCACCAAAGAATGCCAGCCTATCAGGAAACAGGCAGACCAGGGCCC[T/C]GTGGGGGCAGCCCAGACCAGTACCCTTACCGAACCCAGGATTCCCGGCAGAAGAACCCCA	37.5	2	206480460	PARD3B	EXON
rs371226230	CTTCGGGAAATGCTGGGCTGCTAAGGGTTTGGTCCACCCATCCCGGGAGTGCCCGGTCCT[T/C]GACGTCCATCTGTTCCCTAGCCCATGGCGGTCACCATGCTGGACGGGTGGGGGTGGCCGA	37.5	3	128199845	GATA2	EXON
rs148554346	AGCAGCTGAGGGGTGCAGTGGCGTCTTGGAGAAGGGGCTCACGGTCCAGGGGTTGTGGTG[A/G]TGGGCCGCAGCGGCAGAGAGGGCTGCTTTGCCCCCGTCCAGCCAGGGCAAACCCGGGCTG	37.5	3	128205108	GATA2	EXON
rs7611275	GCCTCGGGCCCTCCCGGCTCCGGCCCCTCGGCATCCTCCGGCCGCCCTGGCGCCAGCTGC[C/G]GACTCCTGCACAGACATGAAGCGGGGGCCGCGCACGCCTAAGAAGCCCAAGCCAGCCAAT	37.5	3	128206759	GATA2	EXON
rs376351188	ACGAGCCTTGCTGCGCTGCTTAGGGGTGAAGCTGGAGGCCGGTCCCCCCAGGAAGCCTCC[A/G]GGGTGGAAGAGTCCGCTGCTGTAGTCGTGGGCAGCCGCCGGCACATAGGAGGGGTAGGTG	37.5	3	128204640	GATA2	EXON
rs368537961	GACCCACTGGAGTAACTTGGCCTCAGCTTCCTCTGACACCCCTCCAGCCCAAGCCCTCCG[A/C]TCCAGCCCCTCCGCCCAGTCTGAGGGCTCCTCAGCAGAGAGAGAACCTCCGAGAGTTGAT	37.5	8	11281851	FAM167A/C8orf12	EXON
rs201036644	GCCTGCGCCAAGGGGTAGTGAGACCGCGCGGCAACAGCTTGCGGCTGCGGGGAGCTCCCG[T/C]GGGCGCTCCGCTGGCTGTGCAGGCGGCCATGGATTCCTTGCGGAAAATGCTGATCTCAGT	37.5	11	62439189	C11orf48/C11orf83	EXON
rs150929249	AGCTGGACCTGAGACCCCAGCAGGGACACAGCCTCTCCCTGGGTCCTGGTCCTGACCTGC[C/G]CCCAACTCCTGCCTTCACCCCCTGCCAGGCCAGCAAATGCCAACCAGCCCCCAGAAACCA	37.5	3	128198733	GATA2	EXON
rs138151717	GGAGGCGGCAGGTGTGTTCGATTTTCAGCTTGTTGATGTCGCCACGCAGGCGCATGAGCT[A/G]TCTGGCCAGTTGCTGGTCCTGCAGCCGCATCTCCGTCTGGAAGGGAGGGGGAGCAGGCAG	37.5	8	11282109	FAM167A/C8orf12	EXON
rs374495352	AGGAGTGGTGTCGGCCTTCGGGAAATGCTGGGCTGCTAAGGGTTTGGTCCACCCATCCCG[A/G]GAGTGCCCGGTCCTCGACGTCCATCTGTTCCCTAGCCCATGGCGGTCACCATGCTGGACG	37.5	3	128199830	GATA2	EXON
rs145980766	GAGAAGCAGTGACCCAGTGCCAGGCCCACCTGCTGATACCCAGCCAAGCGCTTCACACCC[T/C]GGTGGCCAGAGTCTGAAACTGGTTGTTCCAGTAGGTATCCTGCTGCTTGTAGTTCTAATG	37.5	2	205912383	PARD3B	EXON
rs375694374	GCGGGTGGAGAGCCCCGGACTGGAGCTCCTGCGAACTCCCCTTCCTGCCCTCAGGAGATG[T/C]CACTGCAGGACCCAAGGAGCAGGGAGGAGGCGGCCAGGACCCAGCAGCTATTGCTGGCCA	37.5	11	62439431	C11orf83	EXON
rs191737565	TTCTTGCCCTGCCCTGCCCGACACAGGCAACGTGACCCCAAGCGACAGCCAGCTGATGCT[T/C]GCTTCTCCGAGCCCGGCGGTCAGCAGCCGGAAGTAGCCCGCCCGGGGGCGGGGAAAGGTG	37.5	18	21033114	RIOK3	EXON
rs73862208	GAGAGGGGCAGAGAGGGGCAGGAACTACAGGGCTCTAGAGGGCACCTGGGCCTCGGACAC[C/G]CGGCCGCTCAGGGCTGTGCTTGACCCAGTGGAGGTGGCCCGGCCGGTGGCTCCAGAAAGG	37.5	3	128207344	GATA2	EXON
rs144073602	TATAATAAATATATGTTATTAGGGTGCATATGTGCATATATTTTCACACA[A/T]ATATATGTCTTATATACATAAAACAGCACTTAATGGTCATGTTCTTTGCA	37.5	1	84335527	TTLL7/MIR548AP	EXON
rs76185963	CTTTATTCCCTCCAAAAAAAAAAGTCTTGAGTTTAATTTAGGTCTATTTTGGCTGAGATT[A/C]GCATACCTCTGACTCACAGGATTTAATAAATTATAGTATTATTGAATACATAGGACATCC	37.5	2	206482117	PARD3B	EXON
rs4046036	CAGTGGTGGAGCCCCTACTGCGCTGTGTCACCCGAGGTGCTGGGTGGTAGGAGGCGGGGG[-/AA]GGCAGCGGGAGCTCTAGTGTCCTCTCCTCACCTCCTAGCAGCAGCCCACTCTGGCTCCCA	37.5	3	128204991	GATA2	EXON
rs375274981	CTCACTCTCGCCTCTCATGGGATTTGGCAGCAATAAAAATGCAAAGAAAATTAAGATTGA[A/C]CTAAAGAAAGGTAATTATTAAATTATGCCTAATAGCATTCTATTATTGTAACATGTAAAA	37.5	2	205986663	PARD3B	EXON
rs34069018	TAGCATACATTTTTTACAGACAATATATAAATGTTGTACATAATTAACAATAACTTAGTT[-/T]CACTAATCCAAAATAAAACAAGCCAAATAAAACATAAAAACAGAAAATACTGCCGATTCT	37.5	3	128198385	GATA2	EXON
rs376003468	CCGGGGCGGGGCGCACTCACATTGTGCAGCTTGTAGTAGAGGCCACAGGC[A/G]TGCAGACAGGGTCCCCGTTGGCGTTTCGGCGCCATAAGGTGGTGGTTGTC	37.5	3	128200692	GATA2	EXON
rs146816358	GAGTGGTGTGGAGAGGCTGAAGGAGGAGGCAAGAGGGGAGTCACAGAAGAGGTCGGCCAG[C/G]TCATCCCGCTCCTCCAGCTCGTAGGTGGCATCGTTGAGCATCCTCCTGTGGAGGCGGCAG	37.5	8	11281999	FAM167A/C8orf12	EXON
rs45463801	GGCTTCCCTCTCTGAAATAGCCGAACTCCAGGCTGGGCTGAGCCAAAGCCAGAGTGGCCA[T/C]GGCCCAGGGAGGGTGAGCTGGTGCCTGCTTTGACGGGCCAGGCCCTGGAGGGCAGAGACA	37.5	3	128199316	GATA2	EXON
rs201433985	AAAAGTCCAGCTCCTTGGAGAGTCTGCAGACTGCAGTGGCCGAGGTCAGGAAGAATGACC[T/C]TCCCTTTCACAGGCCCCGGCCGCACATGGTTCGAGGCCGAGGCTGCAATGAGAGCTTTAG	37.5	2	206165353	PARD3B	EXON
rs373617135	TGCAGGAAACCCCACCTGGGCAGCGGTCAGGTGCGGAGGCAGCCTCTCAG[T/C]GTGGGGAACATTCACAGTAACTGCTGGCAGGCTGCTGGGCGCCCTCCAGG	37.5	3	128199688	GATA2	EXON
rs369673069	TCCGCTGCTGTAGTCGTGGGCAGCCGCCGGCACATAGGAGGGGTAGGTGGGGATGGGGTG[A/G]TGTGTAGCAGGCTGGGTGCCCATAGTAGCTAGGCCTGGGCGCAGGGGACTGCCACTTTCC	37.5	3	128204712	GATA2	EXON
rs371548043	GTCCGGCGACGGCAGTGGCTGCAGCGGGCACGGCCGAAGGACCGGGAGGCGGTGGCTCGG[T/C]CCGAATCGCCGTGAAGAAAGCGCAACTACGCTCCGCTCCGCGGGCCAAGAAACTGGAGAA	37.5	3	20082187	KAT2B	EXON
rs201703766	CTATGCACCCTCCCAAAGGGAGCTATCCCCGCCCCACAGAGCTCAGGGTGGCAGATCTCC[A/G]GTATCCTCAGCACTACCCACCCCCGCCAGCTCCCCAGCACAAAGGACCCTTTCGACAAGA	37.5	2	206480332	PARD3B	EXON
rs370672901	GGACCCCTGCCTCCGGGAGACCCACTGGAGTAACTTGGCCTCAGCTTCCT[T/C]GACACCCCTCCAGCCCAAGCCCTCCGCTCCAGCCCCTCCGCCCAGTCTGA	37.5	8	11281823	FAM167A/C8orf12	EXON
rs3021516	GGAAACTTCACAAAGACAGGAGCCCTGACCCATCCACCTTGGCCTCACCCCACCCCAGCA[T/C]GGAAGCCAGGCGGCCAGTGGAGGCCGGTAGTGCTGAATGGACATGGGGCTGGATGAAAAG	37.5	8	11295609	FAM167A/C8orf12	EXON
rs200491749	TTCGGGAAATGCTGGGCTGCTAAGGGTTTGGTCCACCCATCCCGGGAGTGCCCGGTCCTC[A/G]ACGTCCATCTGTTCCCTAGCCCATGGCGGTCACCATGCTGGACGGGTGGGGGTGGCCGAA	37.5	3	128199846	GATA2	EXON
rs373999863	TGCTGCTGGCTGGGTGAGGACAGGCCCAGAGGACAGCATCACTGGCACCC[A/G]CCCTGCATTTGGGTCCTCTGCACCTCAGCTCCCAGCATCTGGGCCTCCTC	37.5	8	11292475	FAM167A/C8orf12	EXON
rs201159232	TGTCGGCCTTCGGGAAATGCTGGGCTGCTAAGGGTTTGGTCCACCCATCCCGGGAGTGCC[T/C]GGTCCTCGACGTCCATCTGTTCCCTAGCCCATGGCGGTCACCATGCTGGACGGGTGGGGG	37.5	3	128199838	GATA2	EXON
rs72927298	CTCTCCGGGGTCCTGTGAGCTGCCGTCGGGTGAGCACGTTTCCCCCAAACCCTGGACTGA[C/G]TGCTTTAAGGTCCGCAAGGCGGGCCAGGGCCGAGACGCGAGTCGGATGTGGTGAACTGAA	37.5	11	62439759	C11orf83	EXON
rs374968951	CTTCCCCTCCCCAGCACCAAAGAATGCCAGCCTATCAGGAAACAGGCAGACCAGGGCCCC[A/G]TGGGGGCAGCCCAGACCAGTACCCTTACCGAACCCAGGATTCCCGGCAGAAGAACCCCAT	37.5	2	206480461	PARD3B	EXON
rs373032436	CTGCAGGACCCAAGGAGCAGGGAGGAGGCGGCCAGGACCCAGCAGCTATTGCTGGCCACT[T/C]TGCAGGAGGCAGCGACCACGCAGGAGAACGTGGCCTGGAGGAAGAACTGGATGGTTGGCG	37.5	11	62439494	C11orf83	EXON
rs146660278	GAAGGGCCGGGCCCAGGGAAGGTGGAAGTGGAAGAAACTCACCGAGCGAG[A/G]CGCGGTGGGCGGCGCCCCCGGGCGGACGGGGCCTGGAGTAGAGCTGGGAG	37.5	3	128211750	GATA2	EXON
rs374930647	GATAGTATAGAAATGTAATCTTCATATATCATCCTAGCCTTTTCTTCAATTACTTTTTTG[T/C]TCTGCTCCTTCTTTAAGTCTTCACAAGCAAGCCAGAAAAGTAGGTTCTCTTCACTGTATT	37.5	6	153345467	RGS17	EXON
rs139424281	ACATTCACATATTTGTGTAAACAATTTTAACATGGTTTATTACGTTTCCAGAAAGGTTAA[A/G]TCTTATATTCCATTTTCTGCTAATTCTTCTTTCATATATCATTTAATATAATAAATATAT	37.5	1	84335430	TTLL7/MIR548AP	EXON
rs185484996	CTAAACCCTTTTTCAGGTCAAAAGGCATGTTATCTAGAAAATAATTTAACACTGTAATTG[A/G]ATCTTCAAGATCAATTTGTTTTATATACTCTGCAGCAAAAATAACATTTCTAGTAGGAAG	37.5	1	84335280	TTLL7/MIR548AP	EXON
rs35879327	CATGCCTATCACCCAGCTTAATAAAAAGAACATTGCTAATATTTTACTGCAATTACTTTT[-/T]GCACCAACCTAATACTTCATGTGATATTTATTATTTATGTAGCTAATGTTTCTTAGATTC	37.5	1	84379048	TTLL7/MIR548AP	EXON
rs376452919	CTGGCGTGGGCTACGCGCTCCTCGTTATCGTGACCCCGGGAGAGCGGCGGAAGCAGGAAA[T/C]GCTAAAGGTAGAAGCAACTGGTAGTCCCGAGGAAGGGTGGGCGGGTGGAGAGCCCCGGAC	37.5	11	62439330	C11orf83	EXON
rs369090343	GTGGAGAGGCTGAAGGAGGAGGCAAGAGGGGAGTCACAGAAGAGGTCGGCCAGCTCATCC[T/C]GCTCCTCCAGCTCGTAGGTGGCATCGTTGAGCATCCTCCTGTGGAGGCGGCAGGTGTGTT	37.5	8	11282006	FAM167A/C8orf12	EXON
rs374810146	GCTGCGCCCGCGGGGTCAGACACCTGTTCGGCCCGGCCCGGCGTGGTCGCCGGGGGCCAG[T/G]ATGAAAGTGACCGTGTGCTTCGGCAGGACGGGCATCGTGGTGCCCTGCAAGGAGGGCCAG	37.5	2	205410722	PARD3B	EXON
rs139617000	TAATGTCTTTCCCCTTGATTATACATGATATATTCCTATTTTGGAAACTT[T/C]GAAAACTATAAAAAAGTCAAAAGAATAATATTACCACTCAGAAATAAAGA	37.5	8	11296099	FAM167A/C8orf12	EXON
rs199938223	CTTCATGCTCTCCGTCAGTGACACCTGGTACTTGACGCCGTCCTTGTCCTCTCCTCGGGC[T/C]GCACTACCCCCCGCGGAAGATGAGGCTGGAGACGCAGCCCCCGTGGTGCTAGGGTCAGGA	37.5	3	128204835	GATA2	EXON
rs75070299	ACTGCTGGTGAGGAGAAGCAGTGACCCAGTGCCAGGCCCACCTGCTGATACCCAGCCAAG[T/C]GCTTCACACCCTGGTGGCCAGAGTCTGAAACTGGTTGTTCCAGTAGGTATCCTGCTGCTT	37.5	2	205912371	PARD3B	EXON
rs78245253	AGCCTCCGGGGTGGAAGAGTCCGCTGCTGTAGTCGTGGGCAGCCGCCGGCACATAGGAGG[C/G]GTAGGTGGGGATGGGGTGGTGTGTAGCAGGCTGGGTGCCCATAGTAGCTAGGCCTGGGCG	37.5	3	128204693	GATA2	EXON
rs374267427	ATCCCCGCCCCACAGAGCTCAGGGTGGCAGATCTCCGGTATCCTCAGCACTACCCACCCC[T/C]GCCAGCTCCCCAGCACAAAGGACCCTTTCGACAAGACGTTCCGCCTTCCCCTCCCCAGCA	37.5	2	206480356	PARD3B	EXON
rs77448517	CCAGAGGAGAAGAGGGTGCAGGCTGAGGTCCCCACAAATCTGCCCCCAGAGCCCTGGCAA[A/G]TGGACCCGCCAATCCCGAGGAAGAACCGGAGGACTTGGGACAGCTCAGACCACCAAGTCT	37.5	3	128199435	GATA2	EXON
rs376807405	GACCCCTGCCTCCGGGAGACCCACTGGAGTAACTTGGCCTCAGCTTCCTCTGACACCCCT[C/G]CAGCCCAAGCCCTCCGCTCCAGCCCCTCCGCCCAGTCTGAGGGCTCCTCAGCAGAGAGAG	37.5	8	11281834	FAM167A/C8orf12	EXON
rs115673738	GCGGCCAGTGGAGGCCGGTAGTGCTGAATGGACATGGGGCTGGATGAAAAGACTTCCGCC[T/C]GCCTCTCTCAGCCCCGGAATCGCCATGAGCTGCTATTCCGGTGAGGTGCTGCTGTGGGGA	37.5	8	11295679	FAM167A/C8orf12	EXON
rs115799885	TCCTGACCTGCCCCCAACTCCTGCCTTCACCCCCTGCCAGGCCAGCAAATGCCAACCAGC[T/C]CCCAGAAACCAAGGGCAGCAAAGGCCCCTCCCCACCCCCAGCTTTCATACTAGGGCTGTG	37.5	3	128198782	GATA2	EXON
rs80119103	GCTATCCCCGCCCCACAGAGCTCAGGGTGGCAGATCTCCGGTATCCTCAGCACTACCCAC[A/C]CCCGCCAGCTCCCCAGCACAAAGGACCCTTTCGACAAGACGTTCCGCCTTCCCCTCCCCA	37.5	2	206480353	PARD3B	EXON
rs190007569	GTCGGCCTTCGGGAAATGCTGGGCTGCTAAGGGTTTGGTCCACCCATCCCGGGAGTGCCC[A/G]GTCCTCGACGTCCATCTGTTCCCTAGCCCATGGCGGTCACCATGCTGGACGGGTGGGGGT	37.5	3	128199839	GATA2	EXON
rs376805544	GGGAGTGCCCGGTCCTCGACGTCCATCTGTTCCCTAGCCCATGGCGGTCACCATGCTGGA[T/C]GGGTGGGGGTGGCCGAAGGAGAGGCTGGAGGAGGGGTGGATGGGCGTCGGAGTGGGCAGG	37.5	3	128199889	GATA2	EXON
rs373107570	TTGTGGCTGTTCATATGCTTTTATTCATTAGGTAAATGGGAGAGATGTCACCGGACGAAC[T/C]CAGGAAGAGCTTGTGGCCATGCTCAGGAGCACCAAGCAGGGGGAGACAGCATCGCTGGTC	37.5	2	205990362	PARD3B	EXON
rs55638384	CTGCAGGAGGCAGCGACCACGCAGGAGAACGTGGCCTGGAGGAAGAACTGGATGGTTGGC[C/G]GCGAAGGCGGCGCCGGCGGGAGGTCACCGTGAGACCGGACTTGCCTCCGTGGGCGCCGGA	37.5	11	62439554	C11orf83	EXON
rs140647775	GGAGAGAGAGTGGGAGAGATGTGACTGCTGCTGGCTGGGTGAGGACAGGC[A/C]CAGAGGACAGCATCACTGGCACCCACCCCTGCATTTGGGTCCTCTGCACC	37.5	8	11292450	FAM167A/C8orf12	EXON
rs184208259	TCAGCGGTGGGGAACATTCACAGTAACTGCTGGCAGGCTGCTGGGCGCCCTCCAGGAGAG[A/G]GGGTGCTGGGCCGAGCCGGGCTGGCAGGAGTGGTGTCGGCCTTCGGGAAATGCTGGGCTG	37.5	3	128199744	GATA2	EXON
rs142693553	AGTGACACCTGGTACTTGACGCCGTCCTTGTCCTCTCCTCGGGCTGCACTACCCCCCGCG[T/G]AAGATGAGGCTGGAGACGCAGCCCCCGTGGTGCTAGGGTCAGGAGACACTTCTTTGGGTG	37.5	3	128204851	GATA2	EXON
rs71329996	AGGATCCAGACAGCCACAGTAAAGCTGGACCTGAGACCCCAGCAGGGACACAGCCTCTCC[T/C]TGGGTCCTGGTCCTGACCTGCCCCCAACTCCTGCCTTCACCCCCTGCCAGGCCAGCAAAT	37.5	3	128198711	GATA2	EXON
rs113334489	ACAGGCCCAGAGGACAGCATCACTGGCACCCACCCCTGCATTTGGGTCCTCTGCACCTCA[C/G]CTCCCAGCATCTGGGCCTCCTCCCTGCCTGCCTCCCCCCCTCACTCAATCTGTCTCCACT	37.5	8	11292504	FAM167A/C8orf12	EXON
rs45598538	CCTGGAGGGCGCCCAGCAGCCTGCCAGCAGTTACTGTGAATGTTCCCCACCGCTGAGAGG[T/C]TGCCTCCGCACCTGACCGCTGCCCAGGTGGGGTTTCCTGCATGGACAGTTGTTTGGAGAA	37.5	3	128199679	GATA2	EXON
rs372968845	GCTGAAGGAGGAGGCAAGAGGGGAGTCACAGAAGAGGTCGGCCAGCTCATCCCGCTCCTC[A/C]AGCTCGTAGGTGGCATCGTTGAGCATCCTCCTGTGGAGGCGGCAGGTGTGTTCGATTTTC	37.5	8	11282014	FAM167A/C8orf12	EXON
rs200032251	TGCCCTCAGGAGATGCCACTGCAGGACCCAAGGAGCAGGGAGGAGGCGGCCAGGACCCAG[T/C]AGCTATTGCTGGCCACTCTGCAGGAGGCAGCGACCACGCAGGAGAACGTGGCCTGGAGGA	37.5	11	62439476	C11orf83	EXON
rs56196333	ATACCATGCCAGGACTCTCCGGGGTCCTGTGAGCTGCCGTCGGGTGAGCACGTTTCCCCC[A/T]AACCCTGGACTGACTGCTTTAAGGTCCGCAAGGCGGGCCAGGGCCGAGACGCGAGTCGGA	37.5	11	62439745	C11orf83	EXON
rs75235065	GGTCAGAAACACTCCTTATCTCAGGATTCTACGGGTCTGGCCGAGGGACCCCTGCCATGC[C/G]GTATGACCCCAGACTGACCTCCCTAACCTGCTGGGGTCTTAACTTGCTGATCCTCAAGCC	37.5	8	11280724	FAM167A/C8orf12	EXON
rs373132004	TCCAGGGGCTCATCCTATGCACCCTCCCAAAGGGAGCTATCCCCGCCCCACAGAGCTCAG[T/G]GTGGCAGATCTCCGGTATCCTCAGCACTACCCACCCCCGCCAGCTCCCCAGCACAAAGGA	37.5	2	206480318	PARD3B	EXON
rs372350472	GTCACGCCAATAAGCTTGAGTGGTGTGGAGAGGCTGAAGGAGGAGGCAAGAGGGGAGTCA[T/C]AGAAGAGGTCGGCCAGCTCATCCCGCTCCTCCAGCTCGTAGGTGGCATCGTTGAGCATCC	37.5	8	11281982	FAM167A/C8orf12	EXON
rs143743025	TCTGAGGGCTCCTCAGCAGAGAGAGAACCTCCGAGAGTTGATGTTCATCTTGGTCACGCC[A/G]ATAAGCTTGAGTGGTGTGGAGAGGCTGAAGGAGGAGGCAAGAGGGGAGTCACAGAAGAGG	37.5	8	11281930	FAM167A/C8orf12	EXON
rs146904791	AGAAATTTCAGAGAACTAATTTTTAAAATCTTTAGCATTTAAAACTTTTTT[-/T]GTTTTGTTTTCTGACATATTCTGACAAAGAGCAGCAAACCACTGCTGTGTG	37.5	18	21062983	RIOK3	EXON
rs368838029	CTTTTTCAGGTCAAAAGGCATGTTATCTAGAAAATAATTTAACACTGTAA[A/T]GGATCTTCAAGATCAATTTGTTTTATATACTCTGCAGCAAAAATAACATT	37.5	1	84335277	TTLL7/MIR548AP	EXON
rs79400370	TTATTCCCTCCAAAAAAAAAAGTCTTGAGTTTAATTTAGGTCTATTTTGGCTGAGATTAG[C/G]ATACCTCTGACTCACAGGATTTAATAAATTATAGTATTATTGAATACATAGGACATCCCT	37.5	2	206482119	PARD3B	EXON
rs45600542	TTTATCAATAAAATGTAAATTATCTGAAAGGACAGAATATAAGATTTAACCATGTTTGAC[A/G]TATTTTAATTTAGTTAATGAAGCAAAATTCAGTTTATATTTCACTAGAACTGTGTACTTG	37.5	18	21062056	RIOK3	EXON
rs373566051	GGCAACTTGTACTGACTTGATTTTTTTTCTTCCACTTAGCATGGAGGATGAAAAGGAAGA[T/C]AGTAAAGTTATACCTACAGAATGTGCCATCAAGGTATTTAAAACAACCCTTAATGAATTT	37.5	18	21053414	RIOK3	EXON
rs192954085	ATTGGCAAGGGAGAGAAGAGCCTGGTGCTAGCACTTTTGCTTCTTTGGTCTTTCAATAAT[A/G]TCTTTCCCCTTGATTATACATGATATATTCCTATTTTGGAAACTTCGAAAACTATAAAAA	37.5	8	11296053	FAM167A/C8orf12	EXON
rs368501281	CCTCCCCAGCACCAAAGAATGCCAGCCTATCAGGAAACAGGCAGACCAGGGCCCCGTGGG[T/G]GCAGCCCAGACCAGTACCCTTACCGAACCCAGGATTCCCGGCAGAAGAACCCCATGACTG	37.5	2	206480466	PARD3B	EXON
rs369356562	CCATAGTAGCTAGGCCTGGGCGCAGGGGACTGCCACTTTCCATCTTCATGCTCTCCGTCA[A/G]TGACACCTGGTACTTGACGCCGTCCTTGTCCTCTCCTCGGGCTGCACTACCCCCCGCGGA	37.5	3	128204792	GATA2	EXON
rs34632959	GGGGGGTAGTGCAGCCCGAGGAGAGGACAAGGACGGCGTCAAGTACCAGGTGTCACTGAC[A/G]GAGAGCATGAAGATGGAAAGTGGCAGTCCCCTGCGCCCAGGCCTAGCTACTATGGGCACC	37.5	3	128204787	GATA2	EXON
rs369543440	CCCCGTGGGGGCAGCCCAGACCAGTACCCTTACCGAACCCAGGATTCCCGGCAGAAGAAC[C/G]CCATGACTGCAGCCGTATAGCTGAGTGCCACCGAGGCCAGCCCGGTCCAGAAAGGAAGGT	37.5	2	206480517	PARD3B	EXON
rs139455955	ATCTGCCAGCAGCACCTCGGGGGCTCTACAAGGAAAGGGAGCTTCCCTATTATCCAGGGG[T/C]TCATCCTATGCACCCTCCCAAAGGGAGCTATCCCCGCCCCACAGAGCTCAGGGTGGCAGA	37.5	2	206480266	PARD3B	EXON
rs79575216	GCACTTGGTATTGCTACAGGGTGTGGGTCTTGAACTCGGTCAGGCATCGTCAAGCCTGCC[C/G]AGGCCCTCCAGGCCTCTTTGATAGCTACTGAGCCCCTGAAGGCATCAAGACATGACCACG	37.5	8	11279164	FAM167A/C8orf12	EXON
rs371094127	GCAGGAGTGGTGTCGGCCTTCGGGAAATGCTGGGCTGCTAAGGGTTTGGTCCACCCATCC[T/C]GGGAGTGCCCGGTCCTCGACGTCCATCTGTTCCCTAGCCCATGGCGGTCACCATGCTGGA	37.5	3	128199828	GATA2	EXON
rs373564873	GGAGACCCACTGGAGTAACTTGGCCTCAGCTTCCTCTGACACCCCTCCAGCCCAAGCCCT[T/C]CGCTCCAGCCCCTCCGCCCAGTCTGAGGGCTCCTCAGCAGAGAGAGAACCTCCGAGAGTT	37.5	8	11281848	FAM167A/C8orf12	EXON
rs2272595	GGTAGTGCTGAATGGACATGGGGCTGGATGAAAAGACTTCCGCCTGCCTCTCTCAGCCCC[A/G]GAATCGCCATGAGCTGCTATTCCGGTGAGGTGCTGCTGTGGGGATCCTCCAACTCCCTTC	37.5	8	11295695	FAM167A/C8orf12	EXON
rs112460453	CTCACCGTGCGCGGGGCTGTAGGAGACGCGCGCCCGCGCGTGAGCGGGGTTGGCATAGTA[C/G]GGGTTGCCCTGCGAGTCGAGGTGATTGAAGAAGACGTCCACCTCGTCTGGAGGCAGCAGC	37.5	3	128205701	GATA2	EXON
rs373477245	CTCTCCGTCAGTGACACCTGGTACTTGACGCCGTCCTTGTCCTCTCCTCGGGCTGCACTA[C/G]CCCCCGCGGAAGATGAGGCTGGAGACGCAGCCCCCGTGGTGCTAGGGTCAGGAGACACTT	37.5	3	128204842	GATA2	EXON
rs200673021	AGAGTCTGCAGACTGCAGTGGCCGAGGTCAGGAAGAATGACCTTCCCTTTCACAGGCCCC[A/G]GCCGCACATGGTTCGAGGCCGAGGCTGCAATGAGAGCTTTAGAGCAGCCATTGACAAATC	37.5	2	206165371	PARD3B	EXON
rs113102639	GAAAATGCTTTCAGGACCTGCCTGGTTCAGTCACCAGTGGTCTCCCAGGCTGTCACCCTG[T/G]GGTGTGGGTGGCAGTGAAGAGGCTCTTTGGAGATGCATGTGGCCAGGGGAGACAATGGGG	37.5	8	11281126	FAM167A/C8orf12	EXON
rs79350619	AACTGCTGGCAGGCTGCTGGGCGCCCTCCAGGAGAGGGGGTGCTGGGCCGAGCCGGGCTG[A/G]CAGGAGTGGTGTCGGCCTTCGGGAAATGCTGGGCTGCTAAGGGTTTGGTCCACCCATCCC	37.5	3	128199768	GATA2	EXON
rs187409193	CGGGGACAGGGCAGAGCCTGGGCCAAAGGAAGCCACACCCAGTTCTTGCCCTGCCCTGCC[C/G]GACACAGGCAACGTGACCCCAAGCGACAGCCAGCTGATGCTTGCTTCTCCGAGCCCGGCG	37.5	18	21033072	RIOK3	EXON
rs112947643	CTTGTTGTTCTCCAAACAACTGTCCATGCAGGAAACCCCACCTGGGCAGCGGTCAGGTGC[A/G]GAGGCAGCCTCTCAGCGGTGGGGAACATTCACAGTAACTGCTGGCAGGCTGCTGGGCGCC	37.5	3	128199672	GATA2	EXON
rs201709124	CTCATTATCCATCCATCTCTCTGCCATCCCCAAGCATCGCTGGGTGTAAAACGCAAACTC[T/C]CCACCGACACTGCCATGCGTGGTCATGTCTTGATGCCTTCAGGGGCTCAGTAGCTATCAA	37.5	8	11279242	FAM167A/C8orf12	EXON
rs377261969	TGGTGCTAGGGTCAGGAGACACTTCTTTGGGTGGCGTGGGTGGGAAGCCGAAAAGGTGGG[A/C]GCCAGAGTGGGCTGCTGTAGGGGTGAGGGAGGCCACTGAGCTCCCGCTGCCTCCCCCGCT	37.5	3	128204939	GATA2	EXON
rs375186241	GCAGACCAGGGCCCCGTGGGGGCAGCCCAGACCAGTACCCTTACCGAACCCAGGATTCCC[A/G]GCAGAAGAACCCCATGACTGCAGCCGTATAGCTGAGTGCCACCGAGGCCAGCCCGGTCCA	37.5	2	206480506	PARD3B	EXON
rs368405922	GTGGTGTGGAGAGGCTGAAGGAGGAGGCAAGAGGGGAGTCACAGAAGAGGTCGGCCAGCT[T/C]ATCCCGCTCCTCCAGCTCGTAGGTGGCATCGTTGAGCATCCTCCTGTGGAGGCGGCAGGT	37.5	8	11282001	FAM167A/C8orf12	EXON
rs368128382	CACCTCTCACTTTGTCTTCCAGGCACTCCACTGCTGGTGAGGAGAAGCAGTGACCCAGTG[T/C]CAGGCCCACCTGCTGATACCCAGCCAAGCGCTTCACACCCTGGTGGCCAGAGTCTGAAAC	37.5	2	205912342	PARD3B	EXON
rs370015965	GGACGGCCAGCTTAGGAGCTGCTAACATGTGTCTCTTCTTCTCTTTCCAGGGGAGGACCC[A/G]CAGATCCTGTAGACTATCTGCCAGCAGCACCTCGGGGGCTCTACAAGGAAAGGGAGCTTC	37.5	2	206480190	PARD3B	EXON
rs141446583	GCTGCTGCTACTATCATAACTGCTGTCACTGCTGCAGTACTTTGGTCTTTTCATTATCTC[A/T]GTACTCTCAGGCATAGAACACAGAGGCTAAAAAAGATGGAAATGTGTTATTTTGTTAGAA	37.5	1	84377020	TTLL7/MIR548AP	EXON
rs139566311	AAAGAATACAAAGATTGGCTTTGTTCTGATGTTTTACACAGGCTACCGGT[A/G]GTTATTAGTTTTCTGCTCACATGTTTGTGTGTGGCGTTGCTGGGATGTGC	37.5	8	11225797	TDH	EXON
rs143156951	ATAATTAAAAAACTGATTGAAAGAAAACAGGCACAAATTCGAAAAGTTTACCCTGGACTT[A/T]CATGTTTTAAAGATGGAGTTCGACAGATTCCTATAGAAAGCATTCCTGGAATTAGTACGT	37.5	3	20187868	KAT2B	EXON
rs375364662	GGTTCTTCTTTAGACTGGGCTTATGACCTGGGCATCAAACACACATTTGCCTTTGAGCTC[T/C]GAGATAAAGGCAAATTTGGTTTTCTCCTTCCAGAATCCCGGATAAAGCCAACGTGCAGAG	37.5	3	148614378	CPA3	EXON
rs59175995	ACGCATGACTGCTAATCAGAGAGAAAAAGAAGGGGAAGGGAATTGGGGAGGAAAAAAAAT[-/A]CAGAAGGAAGACGAAAGATGGGGCTATAAAAACAAAACTACCTGATAGTTGAAACGCTTT	37.5	2	206480731	PARD3B	EXON
rs200218496	CACTTAATTATTCATTTCCTAATGTGTGCCTTCCCTCTTCACAGTTGATGCGGCAGTTAT[A/G]TCATGAATGTACGCTTGTCCATGCTGACCTCAGTGAGTATAACATGCTGTGGCATGCTGG	37.5	18	21056986	RIOK3	EXON
rs192810285	TTTCCAGAGAGGGCAGTAAGGTGACACCACCAGAATCCACCAGGAGGCCCCGGTCACGCC[T/C]CTGCAGGAGAATTCAGTTATGGAAAATGCTTTCAGGACCTGCCTGGTTCAGTCACCAGTG	37.5	8	11281044	FAM167A/C8orf12	EXON
rs140527015	GTTTCCTTACAGTTCACTTTTTTTTTTTCATTTGCCTCCACAAAGGGAGAAGGTGTTCCG[T/C]GTGAAGCCCCAGGATGAAAAACAAGCAGACATCATAAAGGACTTGGCCAAAACCAATGAG	37.5	3	148583275	CPA3	EXON
rs185633115	TAGTAGCATCTACTTTGATAAGTAAGGAAGGTAGAGATATACTGCACCTTTGGTCCTCGA[C/G]TCTTGGTAGTTTTTCCCATCAACTTTTCATCATCAATTTCACATTGCTCCAGAAGATCCA	37.5	1	84383300	TTLL7	EXON
rs375000019	CTGACTTGATTTTTTTTCTTCCACTTAGCATGGAGGATGAAAAGGAAGATAGTAAAGTTA[T/C]ACCTACAGAATGTGCCATCAAGGTATTTAAAACAACCCTTAATGAATTTAAGAATCGTGA	37.5	18	21053425	RIOK3	EXON
rs113015493	ACATAGGACATCCCTCTACCCCAGCTTACTCTTATCTTTTTAATTTAAAATAGTATTCTG[T/C]TACCAAGAAGGATGCAACTGCTAGTTTTAGATGTAAATAGTGTTATTTACTGGACTTTGT	37.5	2	206482225	PARD3B	EXON
rs376972912	CAACTTGTACTGACTTGATTTTTTTTCTTCCACTTAGCATGGAGGATGAAAAGGAAGATA[T/G]TAAAGTTATACCTACAGAATGTGCCATCAAGGTATTTAAAACAACCCTTAATGAATTTAA	37.5	18	21053416	RIOK3	EXON
rs192267276	GTGTGCTATAACAGGGACAAGCTAAAAGGACAAGCATTTTTCTCTCCTTTTATTTTTATA[T/C]GGATATCTTCTTTTGAAGTATTTTTATTTCACTTTTTCTAACAGCAATATAGAAACAAAT	37.5	8	11278998	FAM167A/C8orf12	EXON
rs369267255	CTATCATAACTGCTGTCACTGCTGCAGTACTTTGGTCTTTTCATTATCTCAGTACTCTCA[A/G]GCATAGAACACAGAGGCTAAAAAAGATGGAAATGTGTTATTTTGTTAGAATTCTTAAAAA	37.5	1	84377030	TTLL7/MIR548AP	EXON
rs371954150	AAGCCCACCTCAATGTTTTCCAGATTTTTACCTCTTTTGGTGATAGTATAGAAATGTAAT[T/C]TTCATATATCATCCTAGCCTTTTCTTCAATTACTTTTTTGTTCTGCTCCTTCTTTAAGTC	37.5	6	153345426	RGS17	EXON
rs192886025	TCATTTAAAATGGCTACTATATATGAGAATTTTTAAGGTATTATACTAAACCCTTTTTCA[A/G]GTCAAAAGGCATGTTATCTAGAAAATAATTTAACACTGTAATTGGATCTTCAAGATCAAT	37.5	1	84335235	TTLL7/MIR548AP	EXON
rs192292399	ATATCATGAAAATGAACAGAATTCTTTTTCCATACTTATATCTAAGAAAAGGCATCATAG[T/G]TTTCTGAAAGAGATAACTATATAACAGCTTTTTAACTATCCAGTCAACTTTCAGCTTTTC	37.5	18	21061884	RIOK3	EXON
rs187092695	TTGGATCTTCAAGATCAATTTGTTTTATATACTCTGCAGCAAAAATAACATTTCTAGTAG[A/G]AAGGAATTAATTATAAACCTAGCAGATTCTAGACATTCACATATTTGTGTAAACAATTTT	37.5	1	84335337	TTLL7/MIR548AP	EXON
rs142635228	CCTAAATTAAAAGAAGTAAAGCTCAATAGTGAAGAAATGAAAGAAGCCTACTATCAAACT[C/G]TTCATGTAAGTTGTGCTTTTAAAAGAATTCACACACTACCTTTAAAAAATATTTCCTCTA	37.5	18	21055066	RIOK3	EXON
rs145095262	ATTTTCCAACAAACAGAGATAAATAGCTCTTTTTCATGTACAGAAATATT[A/G]GCTTCAAAATTAGTGTACTAAACACAGTATATAGAATGTTGAATACCATT	37.5	6	153332169	RGS17	EXON
rs139973213	ATCGACATAAGTCATGTAATTTTTGTTGATATATCATGAAAATGAACAGAATTCTTTTTC[T/C]ATACTTATATCTAAGAAAAGGCATCATAGGTTTCTGAAAGAGATAACTATATAACAGCTT	37.5	18	21061854	RIOK3	EXON
rs375202153	CAAAAAAACGAAAGAGAAGGAGAAGAAAAAGGAAAAGGGCAAATTGAAAG[T/C]AAGGAGAAAAAGCGCAAAGAGGAGAATGAAGATCCAGAAAGGAAAATAAA	37.5	2	206166347	PARD3B	EXON
rs377284175	GGATAAGTATCCTGAAATGGTCTCTCGTATTAAAATTGGATCTACTGTTGAAGATAATCC[A/G]CTATATGTTCTGAAGGTAAAAATAACTCAAGAACCACTAATTCTTATTACTGTTGAAAAA	37.5	3	148596520	CPA3	EXON
rs368504055	GGTCCAACTCTGGGTTTGAAAAAGTCCAGCTCCTTGGAGAGTCTGCAGACTGCAGTGGCC[A/G]AGGTCAGGAAGAATGACCTTCCCTTTCACAGGCCCCGGCCGCACATGGTTCGAGGCCGAG	37.5	2	206165334	PARD3B	EXON
rs137884855	CAATTCAACCTCATCTTCCCTTGAGCAGCCAAACGCAGGGAGCAGCAGTCCTGCCTGCAA[A/C]GCCTCTTCTGGACTTGAGGCAAACCCAGGTAAGCTCTTAAGAGGGGATAAGAGAGGGCTG	37.5	3	20161187	KAT2B	EXON
rs116559910	ACCAGCTCACCCTCCCTGGGCCGTGGCCACTCTGGCTTTGGCTCAGCCCAGCCTGGAGTT[T/C]GGCTATTTCAGAGAGGGAAGCCAGAGGAGAAGAGGGTGCAGGCTGAGGTCCCCACAAATC	37.5	3	128199354	GATA2	EXON
rs151163447	CCCTGTGGGGCCACTGTCAGTGCCTTGCTCCACCTTGACCCAAATGTTCT[T/G]AATTGCAATACTCTGGGAGATGTGGGTGGGGGCTGAGGTGGAGAGTAGAG	37.5	8	11280401	FAM167A/C8orf12	EXON
rs146979421	TCCTCCTGTGGAGGCGGCAGGTGTGTTCGATTTTCAGCTTGTTGATGTCGCCACGCAGGC[A/G]CATGAGCTGTCTGGCCAGTTGCTGGTCCTGCAGCCGCATCTCCGTCTGGAAGGGAGGGGG	37.5	8	11282100	FAM167A/C8orf12	EXON
rs77542386	CAGCACGGAAGCCAGGCGGCCAGTGGAGGCCGGTAGTGCTGAATGGACATGGGGCTGGAT[A/G]AAAAGACTTCCGCCTGCCTCTCTCAGCCCCGGAATCGCCATGAGCTGCTATTCCGGTGAG	37.5	8	11295664	FAM167A/C8orf12	EXON
rs372455331	TAGGCCTGGGCGCAGGGGACTGCCACTTTCCATCTTCATGCTCTCCGTCAGTGACACCTG[A/G]TACTTGACGCCGTCCTTGTCCTCTCCTCGGGCTGCACTACCCCCCGCGGAAGATGAGGCT	37.5	3	128204802	GATA2	EXON
rs372502220	TATCAGGAAACAGGCAGACCAGGGCCCCGTGGGGGCAGCCCAGACCAGTACCCTTACCGA[A/T]CCCAGGATTCCCGGCAGAAGAACCCCATGACTGCAGCCGTATAGCTGAGTGCCACCGAGG	37.5	2	206480493	PARD3B	EXON
rs189636489	CCCAGACCAGTACCCTTACCGAACCCAGGATTCCCGGCAGAAGAACCCCATGACTGCAGC[T/C]GTATAGCTGAGTGCCACCGAGGCCAGCCCGGTCCAGAAAGGAAGGTGTCTACTCTACCTT	37.5	2	206480531	PARD3B	EXON
rs371727853	AGGCACTCCACTGCTGGTGAGGAGAAGCAGTGACCCAGTGCCAGGCCCACCTGCTGATAC[T/C]CAGCCAAGCGCTTCACACCCTGGTGGCCAGAGTCTGAAACTGGTTGTTCCAGTAGGTATC	37.5	2	205912362	PARD3B	EXON
rs377195203	CTATCTGCCAGCAGCACCTCGGGGGCTCTACAAGGAAAGGGAGCTTCCCTATTATCCAGG[T/G]GCTCATCCTATGCACCCTCCCAAAGGGAGCTATCCCCGCCCCACAGAGCTCAGGGTGGCA	37.5	2	206480264	PARD3B	EXON
rs77097456	TGTTGCTGAGTCATGTACTTAGGGTGAATTTGAGACAATACTTAGAGGACAGCAACAGCA[T/C]GTGAGACAGGCACATCTGACATGCCTAATTTCCCCCAAGGCCCTTGCGGGACAGCCTTCT	37.5	8	11281441	FAM167A/C8orf12	EXON
rs374818489	CCGCCAGCTCCCCAGCACAAAGGACCCTTTCGACAAGACGTTCCGCCTTC[C/G]CTCCCCAGCACCAAAGAATGCCAGCCTATCAGGAAACAGGCAGACCAGGG	37.5	2	206480405	PARD3B	EXON
rs143590990	CATAGTAGGGGTTGCCCTGCGAGTCGAGGTGATTGAAGAAGACGTCCACCTCGTCTGGAG[C/G]CAGCAGCTGCGCGGGTTCCATGTAGTTGTGCGCCAGGCCCGGGTGGTGTGAGTCGGGGTG	37.5	3	128205754	GATA2	EXON
rs371117921	TAGGATTCTAGGACTCTTCATCCGAGGCATTGAAGACAACAGCAGGTCCAAGCGGGAGGG[A/G]CTATTTCACGAAAATGAATGTATTGTAAAAATCAACAATGTGGATCTCGTAGACAAAACC	37.5	2	205983702	PARD3B	EXON
rs149662282	GGAGGAGGCAAGAGGGGAGTCACAGAAGAGGTCGGCCAGCTCATCCCGCTCCTCCAGCTC[A/G]TAGGTGGCATCGTTGAGCATCCTCCTGTGGAGGCGGCAGGTGTGTTCGATTTTCAGCTTG	37.5	8	11282020	FAM167A/C8orf12	EXON
rs148024280	CCCCTCTTCCACGAAGTCCCCAGCACCTGCCTTTACCTGAACAGGAACGAGCCTTGCTGC[A/G]CTGCTTAGGGGTGAAGCTGGAGGCCGGTCCCCCCAGGAAGCCTCCGGGGTGGAAGAGTCC	37.5	3	128204594	GATA2	EXON
rs370416023	TAACTTGGCCTCAGCTTCCTCTGACACCCCTCCAGCCCAAGCCCTCCGCTCCAGCCCCTC[T/C]GCCCAGTCTGAGGGCTCCTCAGCAGAGAGAGAACCTCCGAGAGTTGATGTTCATCTTGGT	37.5	8	11281863	FAM167A/C8orf12	EXON
rs145086658	CTTACCGAACCCAGGATTCCCGGCAGAAGAACCCCATGACTGCAGCCGTATAGCTGAGTG[T/C]CACCGAGGCCAGCCCGGTCCAGAAAGGAAGGTGTCTACTCTACCTTTGCCCTTTCTAAAC	37.5	2	206480545	PARD3B	EXON
rs34215457	TGCCAGGCCAGCAAATGCCAACCAGCCCCCAGAAACCAAGGGCAGCAAAGGCCCCTCCCC[-/C]ACCCCCAGCTTTCATACTAGGGCTGTGGGATCCCAGCTCTTTTCCAAAAAGAATTGCAAA	37.5	3	128198815	GATA2	EXON
rs375783598	TCACCGGACGAACCCAGGAAGAGCTTGTGGCCATGCTCAGGAGCACCAAGCAGGGGGAGA[C/G]AGCATCGCTGGTCATTGCCCGCCAAGAAGGACATTTTCTGCCCCGAGAGTTGGTAATGTT	37.5	2	205990409	PARD3B	EXON
rs199711571	TCTTTGATAGCTACTGAGCCCCTGAAGGCATCAAGACATGACCACGCATGGCAGTGTCGG[T/G]GGAGAGTTTGCGTTTTACACCCAGCGATGCTTGGGGATGGCAGAGAGATGGATGGATAAT	37.5	8	11279239	FAM167A/C8orf12	EXON
rs143613867	AGTAACCATCTGCACTCGGGGACAGCGAGGAGCTGACCATGGCCTCTGAT[A/G]ACCAGCAGGTATTAGATGGAAGTGAATGAGAGAGAGAGAGAGAGAGAGTA	37.5	2	206481585	PARD3B	EXON
rs368069102	GACAAGACGTTCCGCCTTCCCCTCCCCAGCACCAAAGAATGCCAGCCTATCAGGAAACAG[T/G]CAGACCAGGGCCCCGTGGGGGCAGCCCAGACCAGTACCCTTACCGAACCCAGGATTCCCG	37.5	2	206480446	PARD3B	EXON
rs150293347	TCTTCCTGCTGGGGCCTTCATCATCTTGTCAAAATTTTGAGACCAGGACAAGACTTCCTC[T/C]GCAGTGGGGTTTTGGCTGCAGAGACAGAACGGGGCCGTGATCAAAGGGAACTTTGTGACC	37.5	6	153345616	RGS17	EXON
rs56187215	TGTATTGAAATAGGTCTGGTTGATCGATGTCAGTCAGTCAGTAGAACCTACCCACCCTCA[T/C]GGCCTGGAGTTCTTGTTCCGGGACTGCAGGAATGTCTCGCAGGTAGACGTGTAAACCAAT	37.5	18	21057190	RIOK3	EXON
rs373119307	AAAAAACTGATTGAAAGAAAACAGGCACAAATTCGAAAAGTTTACCCTGG[A/G]TTTCATGTTTTAAAGATGGAGTTCGACAGATTCCTATAGAAAGCATTCCT	37.5	3	20187864	KAT2B	EXON
rs376031756	TTATTACTGGAGAAAACATTGATACTTCCAGTGACCTTATGCTGGCTCAGATGCTACAGA[T/G]GGAATATGACAGAGAATATGATGCACAGCTTAGGCGTGAAGAAAAAAAATTCAATGGAGA	37.5	18	21044008	RIOK3	EXON
rs369445940	CTTAGGAAGCCCACCTCAATGTTTTCCAGATTTTTACCTCTTTTGGTGATAGTATAGAAA[T/C]GTAATCTTCATATATCATCCTAGCCTTTTCTTCAATTACTTTTTTGTTCTGCTCCTTCTT	37.5	6	153345420	RGS17	EXON
rs76476430	GACATCCCTCTACCCCAGCTTACTCTTATCTTTTTAATTTAAAATAGTATTCTGCTACCA[A/G]GAAGGATGCAACTGCTAGTTTTAGATGTAAATAGTGTTATTTACTGGACTTTGTGATATT	37.5	2	206482231	PARD3B	EXON
rs148818018	ACCATACTTTTCTCTGTTGAATATTGTTTTCCTTTCTTCTGCCTTAGGATGGTCGTCTGC[A/G]AATGAATGACCAGCTGATTGCAGTTAATGGGGAATCTCTTTTGGGAAAGTCCAACCACGA	37.5	2	206036948	PARD3B	EXON
rs147598931	GATCCTCTCTGGCTAGATAACCTGTGCTGATGTGCAGACACGTGGACATC[A/C]CCCTCTGAGACTGGCGGTCCAGAGGCAGTCTCTGCCAGGCAGCATTACCC	37.5	2	206480912	PARD3B	EXON
rs1801991	AACCTGAGGAGTGGGCAATGGTGCTTCTGTGCTTTTCCCCCTTGTAACCCATGTGCCAGA[A/T]GTGTGGAATTTTTAGCTCAGCATTGAGAGAATAAAATGTCACTACCTCTCATCTTATGAA	37.5	18	21061391	RIOK3	EXON
rs200509433	ATGTGGTTCTCACACTCACCATTCCTCTAGGACCTGGATACTCTCCATTTTTGTAGTGTG[T/C]GTGGGTCTTCCCGCATTTTCCCCTCTTTCTTCATTCCTCACAGTGAGGCTGTAATGTAAC	37.5	6	153347630	RGS17	EXON
rs375927513	G[T/C]TGGACATCTTCCGGTTCCGAGTCTGGATCCCTTCCTTCTTCATGGTCAGTGGCCTGTTAA	37.5	3	128200100	GATA2	EXON
rs41292882	ACAGCACCAACAAAAGCAACAGGTGTTGTTGGGCCTCTGGTTTCCAGGAGCTTGAGACAC[A/G]GCAGGTGTTCCTTCATTTTGGGACTGCTGCCTTTTTCGCATTTCAGCTACTTCAGGACCC	37.5	6	153365112	RGS17	EXON
rs146814201	GGGCGCACTCACATTGTGCAGCTTGTAGTAGAGGCCACAGGCGTTGCAGACAGGGTCCCC[A/G]TTGGCGTTTCGGCGCCATAAGGTGGTGGTTGTCGTCTGACAATTTGCACAACAGGTGCCG	37.5	3	128200710	GATA2	EXON
rs376857604	CTTAAGACCATATTGCACAAAAGTCCTTAAATACAGATATAAGTTATGCT[A/G]TGGATTAAATATTACAACAACTATGTGGCAAATGAAGCATTTTACTTTGC	37.5	6	153332353	RGS17	EXON
rs144654473	TACATGATTTTAAAAAAGCCTGTAAGAGGTGAAATATGTGATGTTTGAAG[A/T]CTCTTTATAGACTTTTTATATATATTTTTTAAAACACTCATCTAGATGAG	37.5	3	20194508	KAT2B	EXON
rs377374380	GAAGGTCTGAAAGGCAACAGCTAACAAATTTTCATACTTTTCAAGTAATGCTTTATCTTC[A/C]GGAGGATAAATTCGTCTACAACAAAATCAGATAAACCAATTTTTTAAAAAGAAGCTGTCG	37.5	1	84385502	TTLL7	EXON
rs200945731	GATTCTAGGACTCTTCATCCGAGGCATTGAAGACAACAGCAGGTCCAAGCGGGAGGGACT[A/G]TTTCACGAAAATGAATGTATTGTAAAAATCAACAATGTGGATCTCGTAGACAAAACCTTT	37.5	2	205983705	PARD3B	EXON
rs45611738	ACCTCTCATCTTATGAACAGGATAATATAATTCTTTAACAGCTATAGGTTATCTGGCTGA[-/A]GTAGACCTAATTTTATGTGACTTGTGGTGTAAAATGTCTTGATGATAATTTTTAAAACTT	37.5	18	21061495	RIOK3	EXON
rs372643592	TTTTCTCTATATAAACATTCATTCTCTTACCTTCATCCTTTTCAAAGGATTATTCAACTC[T/C]CGCTGGAATGAAGCTGCTCTTCCTGAAAGGAAGGTCTGAAAGGCAACAGCTAACAAATTT	37.5	1	84385412	TTLL7	EXON
rs111392228	AAAAACAAAAAACCTCCTTTTAGCTTTTCAGATATGTATTTAAATTGAAGTCATAGGACA[T/C]TTTTATTTTATGGAATAGATTTTAATCTATTTACTACTATTAAGGTAAATTTTCTATGGC	37.5	3	20194207	KAT2B	EXON
rs374943624	CTCAGCCCTCCAAAATGATTGTTTTTAAATGAACATTAAGATTCAGAAGAAGAGCCAGCA[A/G]TACTTTCAACAAATGACTTATAAATTTGAGAGTTCAAAAACCTTGGAAAAGAATCTCTGT	37.5	6	153332734	RGS17	EXON
rs376841252	GGAGGGACTATTTCACGAAAATGAATGTATTGTAAAAATCAACAATGTGGATCTCGTAGA[T/C]AAAACCTTTGCTCAGTAAGCATTTTTTCATTGTTTTATTTACTTTCTTGATCCCTAGCAT	37.5	2	205983756	PARD3B	EXON
rs1132122	ATGATATATGAAAGAAGAATTAGCAGAAAATGGAATATAAGACTTAACCTTTCTGGAAAC[A/G]TAATAAACCATGTTAAAATTGTTTACACAAATATGTGAATGTCTAGAATCTGCTAGGTTT	37.5	1	84335412	TTLL7/MIR548AP	EXON
rs183225282	GTTCCCACTCCTAAAAAGGGCTTTATTGGAAAAGGAAAAGATATCACCACCAAACATGAT[A/G]AAGTAGTATGTGGGAGAAAGAACACAGCAAGAATGGAAAATGTAAGTTACAGAAAGTATC	37.5	18	21044551	RIOK3	EXON
rs374001456	TTTTTCTTCTTTCTGACTTTCCTTTTCATTGTGCTTTGATAAGGTAATTCTGTATTCAAA[T/C]CCAGGGGAGAGGGTCCCTGAATAACTTTAAAAAAATGTAAAATAATCAGATAACACTGAA	37.5	1	84417635	TTLL7	EXON
rs367644955	ATTTCATTATGATGAATTGAGCTGTTCTTTTTTCTTTTTTCATAGTGTCCATGGGCTATT[C/G]CTCAAAATACAATATCTTGTTCTTTGGCTGATGTAATGAGTGAACAGCTGGCCAAAGAAT	37.5	18	21042943	RIOK3	EXON
rs148893989	AGCTGGTCAGAGCTTCCAGAAGGAATATCTTCCGAGGACTAAGGTGATCA[A/G]GTTAAGAGGGTTCAACATCCCACGGCCCTCACCTTCCTCCCTCCCACATT	37.5	2	206481303	PARD3B	EXON
rs368440830	TGGCTGTGCAGGCGGCCATGGATTCCTTGCGGAAAATGCTGATCTCAGTCGCAATGCTGG[A/G]CGCAGGGGCTGGCGTGGGCTACGCGCTCCTCGTTATCGTGACCCCGGGAGAGCGGCGGAA	37.5	11	62439261	C11orf83	EXON
rs45479594	TTCTAACAAGGACTTGGAGACTTGGTGGTCTGAGCTGTCCCAAGTCCTCCGGTTCTTCCT[T/C]GGGATTGGCGGGTCCACTTGCCAGGGCTCTGGGGGCAGATTTGTGGGGACCTCAGCCTGC	37.5	3	128199452	GATA2	EXON
rs138628802	CAGCTCGTAGGTGGCATCGTTGAGCATCCTCCTGTGGAGGCGGCAGGTGTGTTCGATTTT[C/G]AGCTTGTTGATGTCGCCACGCAGGCGCATGAGCTGTCTGGCCAGTTGCTGGTCCTGCAGC	37.5	8	11282074	FAM167A/C8orf12	EXON
rs146554939	GGCGGGAGGTGGCCCACAGGTGCCATGTGTCCAGCCAGGGCAGCTGCACTGAAGGGGGAT[A/G]ACTTCTCCTGCATGCACTTTGACAGCTCCTCGAAGCACTCCGCCCCTTTCTTGCTCTTCT	37.5	3	128200031	GATA2	EXON
rs142164179	CTGAGACTGGCGGTCCAGAGGCAGTCTCTGCCAGGCAGCATTACCCGCTC[T/C]GAGGTGGAGCCTCAGCCCCCTTCTTAGAGCTGTTAAGTCTAAGGTGTGGC	37.5	2	206480967	PARD3B	EXON
rs377239984	CGGAAAATGCTGATCTCAGTCGCAATGCTGGGCGCAGGGGCTGGCGTGGGCTACGCGCTC[T/C]TCGTTATCGTGACCCCGGGAGAGCGGCGGAAGCAGGAAATGCTAAAGGTAGAAGCAACTG	37.5	11	62439290	C11orf83	EXON
rs367612747	GCCTAGTTTGTTTATTTATTTACAATCCACTAGTCTAATCTAGTTTAGAT[A/C]AGCGGCAATTTTTGGGGTGCCAAGGAGGAAAGAAGGAGATGGCAGTGCGG	37.5	18	21032963	RIOK3	EXON
rs186006519	ACCTTGACCCAAATGTTCTGAATTGCAATACTCTGGGAGATGTGGGTGGGGGCTGAGGTG[C/G]AGAGTAGAGGGGTTGGCAGTGTGCGGGTTTGGCAAAGCATCACGACCATCTTTGGGGTTC	37.5	8	11280442	FAM167A/C8orf12	EXON
rs142539632	GAATTATGCAATTTAAATTGTGGGTACTTTCTTAAAACTTTCATACCAACTCTTCTTTCC[A/G]CCTCTCCAACTGGTGTCTCTGCTGTTCCCAGTCTGAGGAGCCTGGTAAGAGCCTTTTAAT	37.5	1	84386944	TTLL7	EXON
rs138688940	CTGGGTGCCCATAGTAGCTAGGCCTGGGCGCAGGGGACTGCCACTTTCCATCTTCATGCT[T/C]TCCGTCAGTGACACCTGGTACTTGACGCCGTCCTTGTCCTCTCCTCGGGCTGCACTACCC	37.5	3	128204784	GATA2	EXON
rs111707729	TCTCCTTCGAAGGGAAACTTCACAAAGACAGGAGCCCTGACCCATCCACCTTGGCCTCAC[T/C]CCACCCCAGCACGGAAGCCAGGCGGCCAGTGGAGGCCGGTAGTGCTGAATGGACATGGGG	37.5	8	11295597	FAM167A/C8orf12	EXON
rs368945010	CCGAACCCAGGATTCCCGGCAGAAGAACCCCATGACTGCAGCCGTATAGCTGAGTGCCAC[T/C]GAGGCCAGCCCGGTCCAGAAAGGAAGGTGTCTACTCTACCTTTGCCCTTTCTAAACCTGA	37.5	2	206480549	PARD3B	EXON
rs369194609	TCTTCTTCTCTTTCCAGGGGAGGACCCGCAGATCCTGTAGACTATCTGCCAGCAGCACCT[T/C]GGGGGCTCTACAAGGAAAGGGAGCTTCCCTATTATCCAGGGGCTCATCCTATGCACCCTC	37.5	2	206480223	PARD3B	EXON
rs143611106	AGAATCCTGTGTCTTGAAGGAGTGGCCTTTACAGGAAGAGTGCCCATGTTTTCACCTGCA[C/G]CGTTGCCACCAGAGTGTGCAATACCTCCTGCACACAGGCTCAGGGTAAACTGCTCCAAAG	37.5	2	206482760	PARD3B	EXON
rs200129953	GGGAGCTTCCCTATTATCCAGGGGCTCATCCTATGCACCCTCCCAAAGGGAGCTATCCCC[A/G]CCCCACAGAGCTCAGGGTGGCAGATCTCCGGTATCCTCAGCACTACCCACCCCCGCCAGC	37.5	2	206480302	PARD3B	EXON
rs371697297	CAATGCTGGGCGCAGGGGCTGGCGTGGGCTACGCGCTCCTCGTTATCGTGACCCCGGGAG[A/G]GCGGCGGAAGCAGGAAATGCTAAAGGTAGAAGCAACTGGTAGTCCCGAGGAAGGGTGGGC	37.5	11	62439312	C11orf83	EXON
rs377242434	GTCTGCAGACTGCAGTGGCCGAGGTCAGGAAGAATGACCTTCCCTTTCACAGGCCCCGGC[T/C]GCACATGGTTCGAGGCCGAGGCTGCAATGAGAGCTTTAGAGCAGCCATTGACAAATCCTA	37.5	2	206165374	PARD3B	EXON
rs372978414	ACCAAAGAATGCCAGCCTATCAGGAAACAGGCAGACCAGGGCCCCGTGGGGGCAGCCCAG[A/T]CCAGTACCCTTACCGAACCCAGGATTCCCGGCAGAAGAACCCCATGACTGCAGCCGTATA	37.5	2	206480476	PARD3B	EXON
rs371599112	GTTGGCGTTTCGGCGCCATAAGGTGGTGGTTGTCGTCTGACAATTTGCACAACAGGTGCC[C/G]GCTCTTCTGGCGGCCGACTGGGAGGGCAAGGCAGCGTCAGCAGGCTGGACTCCCACGCCC	37.5	3	128200770	GATA2	EXON
rs370831063	CACCACGGGCCCAGTGCTCACCGTGCGCGGGGCTGTAGGAGACGCGCGCCCGCGCGTGAG[T/C]GGGGTTGGCATAGTAGGGGTTGCCCTGCGAGTCGAGGTGATTGAAGAAGACGTCCACCTC	37.5	3	128205685	GATA2	EXON
rs368781999	TCTCCCCCTCGAGCTGGACCATTTGGTTACCCTCGGGATGGCCATCCACTGTCTCCAGAA[A/G]GAGACCACTTAGAGGGTCTCTATGCCAAGGTCAACAAGCCATACCATCCACTGGTTCCAG	37.5	2	206305329	PARD3B	EXON
rs368688012	GGAAGGGGTCCAGATGGGAATGCACACAACCTCCGCTTTGAAGGGATGGAGAGGCAGTAC[A/G]CATCCTTACCCAGGTAGATCACGGAGAGGTCTCCCATCTCCAGCTCACCTACAAATGAAG	37.5	2	206418114	PARD3B	EXON
rs1558713	GGGGGCTGAGGCTCCACCTCGGAGCGGGTAATGCTGCCTGGCAGAGACTGCCTCTGGACC[A/G]CCAGTCTCAGAGGGGGATGTCCACGTGTCTGCACATCAGCACAGGTTATCTAGCCAGAGA	37.5	2	206480927	PARD3B	EXON
rs370179934	GAGCACCAAGCAGGGGGAGACAGCATCGCTGGTCATTGCCCGCCAAGAAGGACATTTTCT[A/G]CCCCGAGAGTTGGTAATGTTCAGATCTCAGTCTCACTGAATTTTTAATGCCGAGCTTAAT	37.5	2	205990449	PARD3B	EXON
rs149768841	CTCAAGTTTACTTTTAAATAGATTGGGGAAAAGAATGAAAGAAGAAAGGCTATTTTTACG[A/G]ATTGTGGCATTCACGCACGAGAATGGGTCTCCCCAGCATTCTGCCAGTGGTTTGTCTATC	37.5	3	148597614	CPA3	EXON
rs375349195	GCCCAGTGCTCACCGTGCGCGGGGCTGTAGGAGACGCGCGCCCGCGCGTGAGCGGGGTTG[A/G]CATAGTAGGGGTTGCCCTGCGAGTCGAGGTGATTGAAGAAGACGTCCACCTCGTCTGGAG	37.5	3	128205693	GATA2	EXON
rs199849698	AGCCAGGCGGCCAGTGGAGGCCGGTAGTGCTGAATGGACATGGGGCTGGATGAAAAGACT[T/C]CCGCCTGCCTCTCTCAGCCCCGGAATCGCCATGAGCTGCTATTCCGGTGAGGTGCTGCTG	37.5	8	11295673	FAM167A/C8orf12	EXON
rs148942346	TTGTAGTAGAGGCCACAGGCGTTGCAGACAGGGTCCCCGTTGGCGTTTCGGCGCCATAAG[A/G]TGGTGGTTGTCGTCTGACAATTTGCACAACAGGTGCCGGCTCTTCTGGCGGCCGACTGGG	37.5	3	128200732	GATA2	EXON
rs368441891	AGATGCAGAAGTTGGCCGTGACACAGATATCATTTGTTGAGCAGAAAATGGGCGGGTGTC[T/C]CCACTGGAAGGTGATTGAGCAGAGATGGACCGAGGGCAGCTGACTGAACGTCTTATGGAG	37.5	1	84373283	TTLL7/MIR548AP	EXON
rs375634584	TTACTGGGTGAAGATTCATCACTTAGAATATACAGATGGAGGAATCCTGGATCCAGATGA[T/C]GTCTTGGCAGATGTTGTTGAAGATAAAGACAAGGTAGATAACTCTAAAAATGTGCCTCTT	37.5	2	205550972	PARD3B	EXON
rs368018452	TATTGGAAAAGGAAAAGATATCACCACCAAACATGATGAAGTAGTATGTGGGAGAAAGAA[T/C]ACAGCAAGAATGGAAAATGTAAGTTACAGAAAGTATCTATCTCTGAATTTAGAGTTTTGT	37.5	18	21044574	RIOK3	EXON
rs188421930	CTGTTCCATCTGTAGGGCTGCTTACTACTGGAACCTAAAACAAAACCTGTTGTTTGTACC[A/C]TCACTTTTTCTGGTGTTTCCTGTGCTTTTGTGATTCCAAGTCTGTTCATAAGTTCTGAAG	37.5	2	206484653	PARD3B	EXON
rs374843237	CCCCTCAGGGGAATTCGGAGCTAGAGGACATGGAAAATAAAGCCAGGAAAGTCAAAAAAA[T/C]GAAAGAGAAGGAGAAGAAAAAGGAAAAGGGCAAATTGAAAGTCAAGGAGAAAAAGCGCAA	37.5	2	206166305	PARD3B	EXON
rs112975024	TATTTAAAACAACCCTTAATGAATTTAAGAATCGTGACAAATATATTAAAGATGATTTCA[A/G]GTTTAAAGATCGCTTCAGTAAACTAAATCCACGTAAGATCATCCGCATGTGGGCAGAAAA	37.5	18	21053509	RIOK3	EXON
rs374569673	AATGGATTCAATGTATTATTTTTGTAGATAGAAGCTTTGGAGAAAATGAATGAAGATCAC[A/G]TTCAGAAGAATGGAAGGAAAGCTGCTTCATTTTTGAAAGATGATGGAGACCCACCACTAC	37.5	18	21061169	RIOK3	EXON
rs201059548	TAAATCTTCAACTATTTTTGCTTCTTAAGTTTCCATTTCCTTTGAAAATTATCGAAAAGT[T/G]CATCCTTATGAAGACAGCGATAGCTCTGAAGATGAGGTTGACTGGCAGGATACTCGTGAT	37.5	18	21044201	RIOK3	EXON
rs370944891	AGGTGTTCCTTCATTTTGGGACTGCTGCCTTTTTCGCATTTCAGCTACTTCAGGACCCAG[T/C]TGGCTGAAAGAGATAAAACAAAAAATTGGGTATGAAAAAAGCAATAAGGATAAGTTGCGT	37.5	6	153365175	RGS17	EXON
rs199503082	GAACCTGACTGCTGTGCACTCTCTCTGGAGACAAGCGAGCAGCTCACCTTTGAGATCCCC[T/C]TGAATGATTCAGGTTCTGCTGGCCTCGGGGTGAGCTTAAAAGGGAACAAATCCAGAGAAA	37.5	2	206023512	PARD3B	EXON
rs377142288	GACGGTCTGTCTGATAAGAGCTCTCACTCTGGCCAAGGAGCTCTGAATTGTGAGTCTGCC[T/C]CTCAGGGGAATTCGGAGCTAGAGGACATGGAAAATAAAGCCAGGAAAGTCAAAAAAACga	37.5	2	206166247	PARD3B	EXON
rs113139618	GGGCTTTCCTGCATGGGTTCAAGGATGTTTATGGCATGTTCTCTGTCGTGTGTGTGTGTG[T/G]GGGGGTGTGTGTGTGTGTGTGTGTGTGTGTGTGTGTAGGTCAGCCCGAGACCTCAAGGGC	37.5	8	11279878	FAM167A/C8orf12	EXON
rs192500917	CACGCTGCTGAAGGGCAACTGGAGGTTCCGGGGAAATGTGAAGAAAGAAACGCAAACACC[A/C]CTAGGAACCAGGTTGGTCTTGTGAATTGATTTCCAGAGGAAGGCTGGAGTTTCTTTCCCA	37.5	8	11291633	FAM167A/C8orf12	EXON
rs374094259	AATATTGTTTTCCTTTCTTCTGCCTTAGGATGGTCGTCTGCGAATGAATGACCAGCTGAT[T/G]GCAGTTAATGGGGAATCTCTTTTGGGAAAGTCCAACCACGAAGCTATGGAAACACTTAGG	37.5	2	206036967	PARD3B	EXON
rs372213795	ATGGATAAGTATCCTGAAATGGTCTCTCGTATTAAAATTGGATCTACTGTTGAAGATAAT[A/C]CACTATATGTTCTGAAGGTAAAAATAACTCAAGAACCACTAATTCTTATTACTGTTGAAA	37.5	3	148596518	CPA3	EXON
rs138556636	TGATTTTTTTTCCCCTCTGCTTCTTAGAAACTCACCAAGCAGTGTGCCTA[-/AAGC]AAGGTGGTTTAGTTTTTTACAAAGAATTGGACATGATGTATTGAAGAGAC	37.5	3	20194065	KAT2B	EXON
rs193162300	TTATACACTGATTTTTGTAAAGGACAAAGTTTTAAAAGCGTATTTAACTTGATGTTTTCT[A/G]TCAGCATAAATAAAATGGTCATGAATAGTCATTAAAAACAGTTGCCAGTGATAATCTGCA	37.5	3	20195336	KAT2B	EXON
rs61759904	TCTAGGACCTGGATACTCTCCATTTTTGTAGTGTGTGTGGGTCTTCCCGCATTTTCCCCT[A/C]TTTCTTCATTCCTCACAGTGAGGCTGTAATGTAACAGAACATTTAATTTTGTCAAGGGAA	37.5	6	153347655	RGS17	EXON
rs145803417	AGCTTACCCTGAATCACAGAAACAGTTCCACAGCCCTTGGCCACGACTCCAGAGTAAGCG[A/G]TTAAAAACCCGGTTGAAAATCCGATATAAATTTACTTCTTCAACATCAGGCACCTTCCAG	37.5	1	84356057	TTLL7/MIR548AP	EXON
rs57237881	ATATTCCTATTTTGGAAACTTCGAAAACTATAAAAAAGTCAAAAGAATAATATTACCACT[T/C]AGAAATAAAGATCATCAAGTTTTGGTGTATTTCCTTTCCTGGTTCTTTTGTTTATACATT	37.5	8	11296138	FAM167A/C8orf12	EXON
rs77807344	ATTAACAATAACTTAGTTCACTAATCCAAAATAAAACAAGCCAAATAAAACATAAAAACA[A/G]AAAATACTGCCGATTCTTTTTCTTATGCGGACACTAGTACAAAATAAGTTACTTCTGGCC	37.5	3	128198428	GATA2	EXON
rs191600248	CCATGATCAAGTTCCAGCCCCTAAATTAAAAGAAGTAAAGCTCAATAGTGAAGAAATGAA[A/G]GAAGCCTACTATCAAACTCTTCATGTAAGTTGTGCTTTTAAAAGAATTCACACACTACCT	37.5	18	21055047	RIOK3	EXON
rs199977739	AGTAAACTAAATCCACGTAAGATCATCCGCATGTGGGCAGAAAAAGAAATGCACAATCTC[A/G]CAAGGTAAAGAAAATATTGTGCTAGACGTAATCTTGGGTAAATACCTTTTTGCATTAGGA	37.5	18	21053586	RIOK3	EXON
rs372751169	CCCACATGGAATTTCCATATTAGATACCTTACTTTTTTCTTTACCCAAGAGCCATCAAAG[T/C]GCTTGGCCCTTCATGGAACCTGTGAAGAGAACAGAAGCTCCAGGATATTATGAAGTTATA	37.5	3	20189906	KAT2B	EXON
rs371072730	TCCGATATAAATTTACTTCTTCAACATCAGGCACCTTCCAGATGCGTGGAAGAACTGTAC[A/G]AATACTTGTTTTCACTATGTCCAAAACCTAGTGGAAAAACCAAAGTACTTACAATCTAGG	37.5	1	84356137	TTLL7/MIR548AP	EXON
rs370991073	GAAACAGTTTGATGTTAAAGAAGATATCCCAGGCAGGCACAGCTACGCAAAATACAATAA[T/C]TGGGAAAAGGTACAGTAAAAAATGCCTGTACTTTTTTTTAAGTTACCCTTAATATTTATT	37.5	3	148596321	CPA3	EXON
rs1061811	AGTCATGTAATTTTTGTTGATATATCATGAAAATGAACAGAATTCTTTTTCCATACTTAT[A/G]TCTAAGAAAAGGCATCATAGGTTTCTGAAAGAGATAACTATATAACAGCTTTTTAACTAT	37.5	18	21061863	RIOK3	EXON
rs367753806	TGAAAAGATGATGGATAAGTATCCTGAAATGGTCTCTCGTATTAAAATTGGATCTACTGT[T/G]GAAGATAATCCACTATATGTTCTGAAGGTAAAAATAACTCAAGAACCACTAATTCTTATT	37.5	3	148596508	CPA3	EXON
rs184381985	CACGCAGAACTTGGAAGACAGAGAAGTTTTGAATGGTGTACAGACAGAACTACTAACTTC[A/G]CCAAGAACTAAGGACACATTGAGGTATTCTCTTTATACAGATAAGAATATCTGATTTATT	37.5	2	205969215	PARD3B	EXON
rs61733456	ATGGTCTCTCGTATTAAAATTGGATCTACTGTTGAAGATAATCCACTATA[A/T]GTTCTGAAGGTAAAAATAACTCAAGAACCACTAATTCTTATTACTGTTGA	37.5	3	148596526	CPA3	EXON
rs148323869	TTCTTTTTTCTTTTTTCATAGTGTCCATGGGCTATTCCTCAAAATACAATATCTTGTTCT[T/C]TGGCTGATGTAATGAGTGAACAGCTGGCCAAAGAATTGCAGTTAGAAGAAGAAGCTGCCG	37.5	18	21042967	RIOK3	EXON
rs145201854	ATGATTGTTTTTAAATGAACATTAAGATTCAGAAGAAGAGCCAGCAGTACTTTCAACAAA[T/C]GACTTATAAATTTGAGAGTTCAAAAACCTTGGAAAAGAATCTCTGTGCATTAAAGTATAT	37.5	6	153332748	RGS17	EXON
rs112957754	ATGGTTTATTACGTTTCCAGAAAGGTTAAGTCTTATATTCCATTTTCTGCTAATTCTTCT[T/C]TCATATATCATTTAATATAATAAATATATGTTATTAGGGTGCATATGTGCATATATTTTC	37.5	1	84335461	TTLL7/MIR548AP	EXON
rs149975740	CAAAATGATTGTTTTTAAATGAACATTAAGATTCAGAAGAAGAGCCAGCAGTACTTTCAA[C/G]AAATGACTTATAAATTTGAGAGTTCAAAAACCTTGGAAAAGAATCTCTGTGCATTAAAGT	37.5	6	153332744	RGS17	EXON
rs199984711	CCAGGCCAAAGTTGCAAAGATTGGCACTGATGTTCTATCAACTCGATATGAAACCCGCTA[T/C]ATCTATGGCCCAATAGAATCAACAATTTGTAAGTCATTCCTCTTATTTACTGAGCCCTTT	37.5	3	148603936	CPA3	EXON
rs377619173	TTTTCTACATTTAGGTAAAATGGTTAGGATATAACTCATGGTGTGGCTAA[T/C]TACATTTATCAATAAAATGTAAATTATCTGAAAGGACAGAATATAAGATT	37.5	18	21061990	RIOK3	EXON
rs148623762	ACTGGGCTTATGACCTGGGCATCAAACACACATTTGCCTTTGAGCTCCGAGATAAAGGCA[A/G]ATTTGGTTTTCTCCTTCCAGAATCCCGGATAAAGCCAACGTGCAGAGAGACCATGCTAGC	37.5	3	148614391	CPA3	EXON
rs200463683	AAAGTGCATCCTTATGAAGACAGCGATAGCTCTGAAGATGAGGTTGACTGGCAGGATACT[C/G]GTGATGATCCCTACAGACCAGGTACCAAAGTTTTTACTTTCTGGGGGCAGCAGAATAGAG	37.5	18	21044256	RIOK3	EXON
rs34438717	AATTAAATGTTCTGTTACATTACAGCCTCACTGTGAGGAATGAAGAAAGAGGGGAAAATG[T/C]GGGAAGACCCACACACACTACAAAAATGGAGAGTATCCAGGTCCTAGAGGAATGGTGAGT	37.5	6	153347643	RGS17	EXON
rs200316155	AAGATTATATGTAACTTGCTTTTCTCTTTTCTTATTTTGGTACTCTTCTTTTTCATTTTC[A/G]TCAGATTCTGAAGAGCTGCTGCTACTATCATAACTGCTGTCACTGCTGCAGTACTTTGGT	37.5	1	84376945	TTLL7/MIR548AP	EXON
rs201236501	AGAAAGGTACTCTGAAACATGGTGGCCTGAGAGAAGAAGAGCTGGAGAAAATGAAAGAAG[A/G]GCGTGAAAGGTGAGCAGAAGTGCCGAGACCTTCATTTTCTTTGACTCTATGGTCTGGGTT	37.5	2	206265838	PARD3B	EXON
rs149243053	CAAAACCGGTTCCCACTCCTAAAAAGGGCTTTATTGGAAAAGGAAAAGATATCACCACCA[A/T]ACATGATGAAGTAGTATGTGGGAGAAAGAACACAGCAAGAATGGAAAATGTAAGTTACAG	37.5	18	21044543	RIOK3	EXON
rs200865870	GGAGAAAAAGCGCAAAGAGGAGAATGAAGATCCAGAAAGGAAAATAAAGAAGAAGGGCTT[T/C]GGCGCCATGCTGAGGTATGGGCCTGCTTTGAAGGCAAAGTTGGTTCTCATTTTGTCTCTC	37.5	2	206166411	PARD3B	EXON
rs367976187	TCCCAGATGCTATTGTTTCCCTATGGATATACATCAAAACTGCCACCTAACCATGAGGAC[T/C]TGGTACGTAGACAAAAGTTTGCACTTCATGCATCGACAATACCATTGACTTTCAGTCTGT	37.5	3	148601600	CPA3	EXON
rs374679149	GTTCTTCTTTAGACTGGGCTTATGACCTGGGCATCAAACACACATTTGCCTTTGAGCTCC[A/G]AGATAAAGGCAAATTTGGTTTTCTCCTTCCAGAATCCCGGATAAAGCCAACGTGCAGAGA	37.5	3	148614379	CPA3	EXON
rs377489362	ACATATTGTTTAGCTTTATTCTTTTTTCTCTATATAAACATTCATTCTCTTACCTTCATC[C/G]TTTTCAAAGGATTATTCAACTCTCGCTGGAATGAAGCTGCTCTTCCTGAAAGGAAGGTCT	37.5	1	84385389	TTLL7	EXON
rs200122770	CCTTCACGTTTCACTAGATTTGGAAAGAAGAAAGAGGATAAGGGTGGAAAGGCTGAGCAG[A/G]AAGGTACTCTGAAACATGGTGGCCTGAGAGAAGAAGAGCTGGAGAAAATGAAAGAAGAGC	37.5	2	206265780	PARD3B	EXON
rs143693751	TTCTGTGAAAAGTAGGATTTTGACAAATGGATTCAATGTATTATTTTTGTAGATAGAAGC[T/C]TTGGAGAAAATGAATGAAGATCACGTTCAGAAGAATGGAAGGAAAGCTGCTTCATTTTTG	37.5	18	21061144	RIOK3	EXON
rs140310363	GCAATGTAGTCTTTGCTATTTTTATATACCTGGCTTATTTCAATTGCCTTTAGCAAAACC[A/G]GTTCCCACTCCTAAAAAGGGCTTTATTGGAAAAGGAAAAGATATCACCACCAAACATGAT	37.5	18	21044490	RIOK3	EXON
rs201769908	TATTCAGCAGGAAAGATCCAAGTTCGAGGAACAAAGGTATAATCCAGAGGCCGAGACTTG[A/C]TCATTCTGTAAATTGGACATAATAGGAAAAATAATTTCTATTCAAACTAGCATATATTTT	37.5	1	84412960	TTLL7	EXON
rs138447722	TTGGCTGATGTAATGAGTGAACAGCTGGCCAAAGAATTGCAGTTAGAAGAAGAAGCTGCC[A/G]TTTTTCCTGAAGTTGCGTAAGTAAAATTCACAAATACTTTATCTAGCAACTTATAGCAGA	37.5	18	21043027	RIOK3	EXON
rs369125831	CGAGATAAAGGCAAATTTGGTTTTCTCCTTCCAGAATCCCGGATAAAGCCAACGTGCAGA[C/G]AGACCATGCTAGCTGTCAAATTTATTGCCAAGTATATCCTCAAGCATACTTCCTAAAGAA	37.5	3	148614438	CPA3	EXON
rs368496621	CACCTCAAAGCAGGGTCATCATACATTTATCAACTTTCTTTCCAGGGCTCAAGATGTCTT[C/G]CGCCAGGCAATGAAATCTCCAAGTGTGCTCCTCCACGTGCTTCCTCCACAAAACCGTGAA	37.5	2	205986330	PARD3B	EXON
rs201455256	ATAGCTATGTGGTTCTCACACTCACCATTCCTCTAGGACCTGGATACTCTCCATTTTTGT[A/G]GTGTGTGTGGGTCTTCCCGCATTTTCCCCTCTTTCTTCATTCCTCACAGTGAGGCTGTAA	37.5	6	153347624	RGS17	EXON
rs144204334	AAGAATACAAAGATTGGCTTTGTTCTGATGTTTTACACAGGCTACCGGTG[T/G]TTATTAGTTTTCTGCTCACATGTTTGTGTGTGGCGTTGCTGGGATGTGCC	37.5	8	11225798	TDH	EXON
rs45437196	CCAGGGCTGGGTCACAGGAAGGAAACAACATTTTCTTGAAAGGGGAAACGTCTCCCAGAT[T/C]GCTCCCTTGGCTTTGAGGCCGAAGCTGCTGTGACTGTGTCCCCTTACTGAGCGCAAGCCA	37.5	3	128199165	GATA2	EXON
rs140748197	GAGCGATCTGGGAGACGTTTCCCCTTTCAAGAAAATGTTGTTTCCTTCCT[T/G]TGACCCAGCCCTGGCCTGGGAATCTGTGCAGGACCGCCCGTGATTGTCTC	37.5	3	128199211	GATA2	EXON
rs370703007	TTTAGCTTTATTCTTTTTTCTCTATATAAACATTCATTCTCTTACCTTCATCCTTTTCAA[A/C]GGATTATTCAACTCTCGCTGGAATGAAGCTGCTCTTCCTGAAAGGAAGGTCTGAAAGGCA	37.5	1	84385397	TTLL7	EXON
rs145444863	AGATGTGGGTGGGGGCTGAGGTGGAGAGTAGAGGGGTTGGCAGTGTGCGG[C/G]TTTGGCAAAGCATCACGACCATCTTTGGGGTTCAAGTTCATTGACATGTG	37.5	8	11280469	FAM167A/C8orf12	EXON
rs368878317	TCCGAGGCATTGAAGACAACAGCAGGTCCAAGCGGGAGGGACTATTTCAC[A/G]AAATGAATGTATTGTAAAAATCAACAATGTGGATCTCGTAGACAAAACCT	37.5	2	205983712	PARD3B	EXON
rs142567025	ACTGACCTCCCTAACCTGCTGGGGTCTTAACTTGCTGATCCTCAAGCCTG[T/C]TGGGAGGGAGAAACTCTTAAAATCAAATCCTACGCACTGTAGTTGACCTA	37.5	8	11280787	FAM167A/C8orf12	EXON
rs372435398	GTGCAGGCGGCCATGGATTCCTTGCGGAAAATGCTGATCTCAGTCGCAATGCTGGGCGCA[T/G]GGGCTGGCGTGGGCTACGCGCTCCTCGTTATCGTGACCCCGGGAGAGCGGCGGAAGCAGG	37.5	11	62439266	C11orf83	EXON
rs200031558	ATAAGAGCTCTCACTCTGGCCAAGGAGCTCTGAATTGTGAGTCTGCCCCTCAGGGGAATT[T/C]GGAGCTAGAGGACATGGAAAATAAAGCCAGGAAAGTCAAAAAAACGAAAGAGAAGGAGAA	37.5	2	206166260	PARD3B	EXON
rs191930030	TGTGTGTAGGTCAGCCCGAGACCTCAAGGGCTTATCTGGAAAGAGGTTGGCAGGAAAGGA[A/G]TGCGTCTTCAGGACTTGGCAGTGTTTGTGCAGAGCTCTGAGGAAGGACAGCAGTACATGG	37.5	8	11279968	FAM167A/C8orf12	EXON
rs371497683	GCTTTCTTCTCTTCACTCTTTTCATGTGTATTCCCCTAACAGAAAGGAGA[A/T]CTGACTGCTGTGCACTCTCTCTGGAGACAAGCGAGCAGCTCACCTTTGAG	37.5	2	206023454	PARD3B	EXON
rs58573983	TGTGTGTGTGTGTGTGTGTGTAGGTCAGCCCGAGACCTCAAGGGCTTATCTGGAAAGAGG[T/C]TGGCAGGAAAGGAATGCGTCTTCAGGACTTGGCAGTGTTTGTGCAGAGCTCTGAGGAAGG	37.5	8	11279954	FAM167A/C8orf12	EXON
rs11804448	CAGGACCAATGCCTGAAAGTGATCCTCTTTTGTCAGTTGCATATTTGTAAACCACTAGCA[T/G]GCACTGTTTACAAAGCTCCACTAGGCGCTGGCAACACTGGAGCTGCAAAGGAGTCACCAC	37.5	1	84348722	TTLL7/MIR548AP	EXON
rs143554523	CGGCGCCATAAGGTGGTGGTTGTCGTCTGACAATTTGCACAACAGGTGCCGGCTCTTCTG[A/G]CGGCCGACTGGGAGGGCAAGGCAGCGTCAGCAGGCTGGactcccacgcccacctcgaccc	37.5	3	128200780	GATA2	EXON
rs150406646	CTCATCCCGCTCCTCCAGCTCGTAGGTGGCATCGTTGAGCATCCTCCTGTGGAGGCGGCA[A/G]GTGTGTTCGATTTTCAGCTTGTTGATGTCGCCACGCAGGCGCATGAGCTGTCTGGCCAGT	37.5	8	11282059	FAM167A/C8orf12	EXON
rs374202873	ATTCCCGAATGGATCTGGTAGGAGTGGCATCGCCTGAGCCCGGGACGGCAGCGGCCTGGG[A/G]ACCCAGCAAGGTAAGTGGCAGACGAGACTGGAGTACTAGCCTTGGTCACACGGGCTGGAT	37.5	18	21033456	RIOK3	EXON
rs138077916	ATCTACTAGGCATTATCAATAATGGTTTCACACATCAATATTCTATAGCC[T/G]AAACAGCTGTGCAACCTGAGGGAAGTCCTTCTCCTCCCCCAGGTTTCACT	37.5	8	11280570	FAM167A/C8orf12	EXON
rs189054703	ATGCTGATCACCTTCCTCCCCTCCCATCAGATTGCATCTTGGAACTGAGGAGGTTCTGGA[A/G]GCTGTACACCCAAGGAAGACATTCTGTGCCGGAGAGAGAGTGGGAGAGATGTGACTGCTG	37.5	8	11292369	FAM167A/C8orf12	EXON
rs3021510	CCTTATCTCAGGATTCTACGGGTCTGGCCGAGGGACCCCTGCCATGCCGTATGACCCCAG[A/G]CTGACCTCCCTAACCTGCTGGGGTCTTAACTTGCTGATCCTCAAGCCTGTTGGGAGGGAG	37.5	8	11280737	FAM167A/C8orf12	EXON
rs138379232	CCTTGTTTCCCTTTTTCCTTTCAAGTAAAGAGCCCAGAGACCCTGACCAGCTTTACAGCA[T/C]GCTCAAGAGCATCCTCCAGCAGGTGAAGGTGGGTGTCCTCTTTATTCACCTCATGCAAAT	37.5	3	20189770	KAT2B	EXON
rs140470073	ACACCAATGACCCATGTGCAGATAACTATCGGGGCTCTGCACCAGAGTCCGAGAAAGAGA[T/C]GAAAGCTGTCACTAATTTCATTAGAAGCCACCTGAATGAAATCAAGGTTTACATCACCTT	37.5	3	148601469	CPA3	EXON
rs370923405	CAGGGGACTGCCACTTTCCATCTTCATGCTCTCCGTCAGTGACACCTGGTACTTGACGCC[A/G]TCCTTGTCCTCTCCTCGGGCTGCACTACCCCCCGCGGAAGATGAGGCTGGAGACGCAGCC	37.5	3	128204814	GATA2	EXON
rs145481836	TTGAGCATCCTCCTGTGGAGGCGGCAGGTGTGTTCGATTTTCAGCTTGTTGATGTCGCCA[T/C]GCAGGCGCATGAGCTGTCTGGCCAGTTGCTGGTCCTGCAGCCGCATCTCCGTCTGGAAGG	37.5	8	11282093	FAM167A/C8orf12	EXON
rs370750401	CGTGAGCGGGGTTGGCATAGTAGGGGTTGCCCTGCGAGTCGAGGTGATTGAAGAAGACGT[T/C]CACCTCGTCTGGAGGCAGCAGCTGCGCGGGTTCCATGTAGTTGTGCGCCAGGCCCGGGTG	37.5	3	128205739	GATA2	EXON
rs145828911	TTCATTTGCCTCCACAAAGGGAGAAGGTGTTCCGCGTGAAGCCCCAGGAT[A/G]AAAAACAAGCAGACATCATAAAGGACTTGGCCAAAACCAATGAGGTAAGC	37.5	3	148583291	CPA3	EXON
rs182456056	TGCGGACACTAGTACAAAATAAGTTACTTCTGGCCGTGGTGCTCCCTGCAGCGACTGCCC[A/G]CCCATATTGCACTTGGTCACTACATCAGCACAATCCTCCTCCTGGGCCAGGGGCCCCTCA	37.5	3	128198514	GATA2	EXON
rs200507437	TGAACCACTTTCGGGAACCATGCACATCAGCAAATGTCTTTAGATCTCCATCTCCCCCTC[A/G]AGCTGGACCATTTGGTTACCCTCGGGATGGCCATCCACTGTCTCCAGAAAGAGACCACTT	37.5	2	206305279	PARD3B	EXON
rs150580860	ACCCATCCACCTTGGCCTCACCCCACCCCAGCACGGAAGCCAGGCGGCCAGTGGAGGCCG[A/G]TAGTGCTGAATGGACATGGGGCTGGATGAAAAGACTTCCGCCTGCCTCTCTCAGCCCCGG	37.5	8	11295636	FAM167A/C8orf12	EXON
rs370661368	TCCAGATGGGAATGCACACAACCTCCGCTTTGAAGGGATGGAGAGGCAGTACGCATCCTT[A/G]CCCAGGTAGATCACGGAGAGGTCTCCCATCTCCAGCTCACCTACAAATGAAGTCTTTAGA	37.5	2	206418122	PARD3B	EXON
rs146116228	GGGTGGTGTGTAGCAGGCTGGGTGCCCATAGTAGCTAGGCCTGGGCGCAGGGGACTGCCA[T/C]TTTCCATCTTCATGCTCTCCGTCAGTGACACCTGGTACTTGACGCCGTCCTTGTCCTCTC	37.5	3	128204767	GATA2	EXON
rs374381892	GTGAGACCGCGCGGCAACAGCTTGCGGCTGCGGGGAGCTCCCGTGGGCGCTCCGCTGGCT[A/G]TGCAGGCGGCCATGGATTCCTTGCGGAAAATGCTGATCTCAGTCGCAATGCTGGGCGCAG	37.5	11	62439206	C11orf48/C11orf83	EXON
rs138345796	AGGTCTATTGCTGCCCAATGACGGATGGGCCGAGAGTGAAGTTCCACCTT[C/G]TCCAACACCACATTCTGCTCTGGGATTGGGCCTCGAAGATTACAGCCACA	37.5	2	206050536	PARD3B	EXON
rs201155045	GAGTGGCTGAAGGGCGGGAGGTGGCCCACAGGTGCCATGTGTCCAGCCAGGGCAGCTGCA[C/G]TGAAGGGGGATGACTTCTCCTGCATGCACTTTGACAGCTCCTCGAAGCACTCCGCCCCTT	37.5	3	128200019	GATA2	EXON
rs201839892	GTTCTGGAGGAGGCCAAGAAACCCCGAGTTATGGGGGATATTCCGATGGAATTAATCAAC[A/G]AGGTTATGTCTACCATCACGGACCCTGCAGCAATGCTTGGACCAGAGGTCAGCAGGGTAA	37.5	3	20164249	KAT2B	EXON
rs142582404	CACACCCCGCCGTCACCGCATACAGAATCTAAGCTCGGGACACGTTTATA[T/C]ACAGCTGTACCTTGGGAAGGATCCAGACAGCCACAGTAAAGCTGGACCTG	37.5	3	128198633	GATA2	EXON
rs147304960	TCTTCTCCTTTTGCCGGGGCAGTTATCAATCCACCTCCTGTGGCTGGGACAATTTCATAC[A/G]ATTCAACCTCATCTTCCCTTGAGCAGCCAAACGCAGGGAGCAGCAGTCCTGCCTGCAAAG	37.5	3	20161128	KAT2B	EXON
rs188664822	AGCCCCTGAAGGCATCAAGACATGACCACGCATGGCAGTGTCGGTGGAGAGTTTGCGTTT[T/C]ACACCCAGCGATGCTTGGGGATGGCAGAGAGATGGATGGATAATGAGTACAACTGCAAAC	37.5	8	11279255	FAM167A/C8orf12	EXON
rs10934857	AGCCTGCCAGCAGTTACTGTGAATGTTCCCCACCGCTGAGAGGCTGCCTCCGCACCTGAC[T/C]GCTGCCCAGGTGGGGTTTCCTGCATGGACAGTTGTTTGGAGAACAACAAGGACAACTTTA	37.5	3	128199662	GATA2	EXON
rs141938530	GGGTGATGGTGTCAGGTGAGAATCCTGTGTCTTGAAGGAGTGGCCTTTAC[A/G]GGAAGAGTGCCCATGTTTTCACCTGCAGCGTTGCCACCAGAGTGTGCAAT	37.5	2	206482732	PARD3B	EXON
rs181805007	GTTTTTTAGCAGACACTCATTTGTGCTCTTGTTTTTTTCTGCCCCAGTGATATGACAAGA[A/G]CAGTGGAGATTTCTGGGGAAGGAGGCCCATTGGGAATACATGTAGTGCCCTTCTTTTCAT	37.5	2	205978228	PARD3B	EXON
rs146721823	CCACCCATTGTTTGCCTTTTATTTTGATCATCATAGGAGAAAAGAGGAAAATGACTGATT[C/G]TCATGTTCTGGAGGAGGCCAAGAAACCCCGAGTTATGGGGGATATTCCGATGGAATTAAT	37.5	3	20164184	KAT2B	EXON
rs368430039	AAATTAGAAGAAATTGACTTACTGGGTTGTTGAATTAATTTGTAGTGGTTGGAGGGTTTA[A/C]GATTATATGTAACTTGCTTTTCTCTTTTCTTATTTTGGTACTCTTCTTTTTCATTTTCGT	37.5	1	84376886	TTLL7/MIR548AP	EXON
rs368209657	TTCTTTTATTCTAATTTCTCAAAATTGATTTTGCTCTTAAGATTGTGGCTTGGACTGAAA[A/G]GATGATGGATAAGTATCCTGAAATGGTCTCTCGTATTAAAATTGGATCTACTGTTGAAGA	37.5	3	148596453	CPA3	EXON
rs144520683	ATCTCTTGCAGGAAAAAGCAGTTGATCCTAAGACACGTTTACTTATGTATAAAATGGTCA[A/C]CTCTGGAATGTTGGAGACAATCACTGGCTGTATTAGTACAGGAAAGGAGTCTGTTGTCTT	37.5	18	21047412	RIOK3	EXON
rs150952531	GACTTCTTTCCCTAAACACATTTCCTTCCTGTGCTTTACAGATAATTAAAAAACTGATTG[A/G]AAGAAAACAGGCACAAATTCGAAAAGTTTACCCTGGACTTTCATGTTTTAAAGATGGAGT	37.5	3	20187827	KAT2B	EXON
rs138401564	TTTTTCACCTCCGACAGGCAACCAAAACTTATGGGAGAAACAAAATTATGACCAAACTCT[T/C]GGACCGAATGAATTTTTACATTCTTCCTGTGTTCAATGTTGATGGATATATTTGGTCATG	37.5	3	148599352	CPA3	EXON
rs75229139	CATTTTGTTTTCTTTTATTCTAATTTCTCAAAATTGATTTTGCTCTTAAGATTGTGGCTT[T/G]GACTGAAAAGATGATGGATAAGTATCCTGAAATGGTCTCTCGTATTAAAATTGGATCTAC	37.5	3	148596444	CPA3	EXON
rs150658641	CTGCAGCGTTGCCACCAGAGTGTGCAATACCTCCTGCACACAGGCTCAGGGTAAACTGCT[T/C]CAAAGCTGGGTTTTGTGTTGCATACAAAGTCAATAAAATAGTTGCTAATCCTGAATGGCA	37.5	2	206482815	PARD3B	EXON
rs368896954	GGCCCTGAAGGACTTGGTTTCACTGTGGTTACCAGAGACTCTTCCATACATGGTCCCGGT[T/C]CCATTTTTGTAAAAAACATTTTACCAAAGGGAGCAGCAATAAAAGATGGCCGCCTACAAT	37.5	2	205989110	PARD3B	EXON
rs373708551	TTATTGCTGAGGAAAGACTGTTATAATTGTGGAATGGCATAATCTTACTGAAATATCACT[T/C]CAAAACTTAGCAACATCATGTTGATTTGCTTGAAGGAATTCTGTAAACCATTTGATGGAA	37.5	1	84403547	TTLL7	EXON
rs138788969	TCGTTGTTTTACAGAGTCCAATTTTATGAGCCAATATGAAGCCACTTTGGTTTTATGATA[A/C]TTCCAGTTATCAATGATCTGTTTGGAAGGAGGAACATTAAGAAATTTACAGGTTGAAACC	37.5	1	84369825	TTLL7/MIR548AP	EXON
rs370382348	TTTACCCTGGACTTTCATGTTTTAAAGATGGAGTTCGACAGATTCCTATAGAAAGCATTC[T/C]TGGAATTAGTACGTATAGACCTTCTTTTAAAAGCGAAATTTTTTAGTAATGCCGTGGTTT	37.5	3	20187914	KAT2B	EXON
rs1801992	ATTACTGGAGAAAACATTGATACTTCCAGTGACCTTATGCTGGCTCAGATGCTACAGATG[T/G]AATATGACAGAGAATATGATGCACAGCTTAGGCGTGAAGAAAAAAAATTCAATGGAGATA	37.5	18	21044010	RIOK3	EXON
rs142082974	TAAACCGCATCAACTATTGGCATCTGGAGGCACCATCTCAACGAAGACTGCGATCTCCCA[A/G]TGATGATATTTCTGGATACAAAGAGAACTACACAAGGTAATCAGATGCAAGTTCTTTTCC	37.5	3	20142924	KAT2B	EXON
rs187029579	AATACCATTGTTACATAGTAAAAATTGCTTTTTTTCTGTCTTAGATTATGTTAAAAAATG[T/C]AAACCATGGCCGATTTTTTTGGCAATTATTTCTTAAGACCATATTGCACAAAAGTCCTTA	37.5	6	153332271	RGS17	EXON
rs140550431	TTGAGAACAAATAAGGTCTGACTTGTTAGATCATCTTCTTGTTCTTTTGTTTTCAGTTGC[T/C]GCAAAGACTCACTCTTAAATTTGAAAGAATACAGATATTTGGAGGGGGTCTTATTTCATT	37.5	1	84372133	TTLL7/MIR548AP	EXON
rs200538548	CACCAATGACCCATGTGCAGATAACTATCGGGGCTCTGCACCAGAGTCCGAGAAAGAGAC[A/G]AAAGCTGTCACTAATTTCATTAGAAGCCACCTGAATGAAATCAAGGTTTACATCACCTTC	37.5	3	148601470	CPA3	EXON
rs200383775	GACTGAAAAGATGATGGATAAGTATCCTGAAATGGTCTCTCGTATTAAAATTGGATCTAC[T/C]GTTGAAGATAATCCACTATATGTTCTGAAGGTAAAAATAACTCAAGAACCACTAATTCTT	37.5	3	148596505	CPA3	EXON
rs188690151	CACTGCACTCCGGCCTAGGTGACAGAGGGAAACTCCATCTCCAGGAAAAAAAAAAAAAAA[T/C]CCAATTTGGATACCAAATTAATCAACTAATTTGAGCTATCTGGCCTTACTCTTAGTAGTT	37.5	18	21062493	RIOK3	EXON
rs34431613	CGTTTCCTAACAATATCAAATCAGTGGATGAAATACAAGCTCAGAAACAGGAACATTTTC[T/C]TAAATCATAACCTAATAGCAAACAAAAATTGAAAAAACAATTATTCTGAAGCTCATTATT	37.5	2	206483620	PARD3B	EXON
rs34468850	CTTAATCTTATCATCAAGCAACACCAGGCTTCTAAATCTTTTTGTTTCATTTAAAATGGC[-/G]TACTATATATGAGAATTTTTAAGGTATTATACTAAACCCTTTTTCAGGTCAAAAGGCATG	37.5	1	84335188	TTLL7/MIR548AP	EXON
rs200432187	ACTTTTTAACATAGATTAGGTCATTAAACTTGTGTTTGTTCTACTATAGGGTCCTGGTTA[T/C]TGGGTGAAGATTCATCACTTAGAATATACAGATGGAGGAATCCTGGATCCAGATGATGTC	37.5	2	205550915	PARD3B	EXON
rs201383568	CTTGTTCTTTGGCTGATGTAATGAGTGAACAGCTGGCCAAAGAATTGCAGTTAGAAGAAG[A/C]AGCTGCCGTTTTTCCTGAAGTTGCGTAAGTAAAATTCACAAATACTTTATCTAGCAACTT	37.5	18	21043019	RIOK3	EXON
rs376574405	GGTCCCGGTCCCATTTTTGTAAAAAACATTTTACCAAAGGGAGCAGCAATAAAAGATGGC[T/C]GCCTACAATCAGGGGACAGAATTTTGGAGGTAAGAATTGGAATTAATAGTTGTATGAAAA	37.5	2	205989161	PARD3B	EXON
rs111339757	TTACTTGTTTCATCCTCATCTGGAGTTTTCATAAATCCCATTTCATCTATTACTAAACGA[A/G]CTGCAAGTAAACAGTTAAGTTAAACCAAAATTAAAATACTTCTGAAATATATTCATTGCA	37.5	1	84415669	TTLL7	EXON
rs144806388	TGTTTAGAACCACCCATTGTTTGCCTTTTATTTTGATCATCATAGGAGAAAAGAGGAAAA[T/C]GACTGATTCTCATGTTCTGGAGGAGGCCAAGAAACCCCGAGTTATGGGGGATATTCCGAT	37.5	3	20164175	KAT2B	EXON
rs41276509	AGTCATAGGACATTTTTATTTTATGGAATAGATTTTAATCTATTTACTACTATTAAGGTA[A/G]ATTTTCTATGGCATGTCCATTAGCTATTTCATGATAGATGATTAGGGGTTTCCTCAAAAC	37.5	3	20194255	KAT2B	EXON
rs370007403	CAAACCATGTTTTCAATGCTTTAAAACAACATGCCTACTCAGAAGAACGTCGAAGTGCCC[A/G]CCTACATGAGAAAAAGGAGCATTCTACAGCAGTAAGGATTTATAGATTTTTTTTTTTCTT	37.5	18	21046209	RIOK3	EXON
rs10804149	AGAAAAGGCGCTAAGGCTAAATCCATCTGCATTTGCTATATTTCATTAGCTAAAGTCAGG[A/T]CAGGGCAGGGCCAAGGCCTCCAATTGGCAAAGGACAGTGTTATGGCTTTAAAAAGCTGAA	37.5	2	206481804	PARD3B	EXON
rs187406655	CAACATGCTTTAATAGGAAAAGATGTATGGTCTATATATGTATCAATCTGGTGAATCCTC[A/G]TTCTAATAAAGGTTCTTTTTCTTTTCTATGATACACACAGCCACGCTGATAATATGCAAA	37.5	3	20194901	KAT2B	EXON
rs377446020	GTAAGTCAAACTTGTAACCTTCCATTAGGAAAGGCTTTTCAATGTATTCTTGAACAATCA[A/G]ATGATCCTGAGATGGAAGTTTGTCACCATTTCTTATCAAAGAAATCCTATGTTTAAAGAA	37.5	1	84408316	TTLL7	EXON
rs370840447	GAGAGAGTATGTGTGTGTGTGTGTATGTGTGTGTTCGAACACATATGATT[T/G]CAGTATGGAGAATGAAAGATTAATAATGCTTTCTGGAGAGTTTGATGCAA	37.5	2	206481677	PARD3B	EXON
rs3021408	GGCTCTGGGGGGAGTGGGTGAGGGGTTAGGGTTTTTCCAGCCATTACATTTACAAGACTC[T/C]TCGGCCTAAAAATGGAATAAAGAAAGAGACAAAATTATTTAACAGGCAGCCGTGGACTGA	37.5	3	20113830	KAT2B	EXON
rs374457534	GCTGCACTGAAGGGGGATGACTTCTCCTGCATGCACTTTGACAGCTCCTCGAAGCACTCC[A/G]CCCCTTTCTTGCTCTTCTTGGACTTGTTGGACATCTTCCGGTTCCGAGTCTGGATCCCTT	37.5	3	128200073	GATA2	EXON
rs187262553	ACAAAACCGTGAACAGTATGAAAAGTCAGTCATTGGCTCTCTTAACATTTTTGGTAATAA[T/C]GATGGCGTTTTGAAAACCAAAGTGCCGCCTCCTGTCCATGGAAAATCGGGACTAAAGACA	37.5	2	205986438	PARD3B	EXON
rs193187748	CCAGCCGGACGGCCAGCTTAGGAGCTGCTAACATGTGTCTCTTCTTCTCTTTCCAGGGGA[C/G]GACCCGCAGATCCTGTAGACTATCTGCCAGCAGCACCTCGGGGGCTCTACAAGGAAAGGG	37.5	2	206480184	PARD3B	EXON
rs374639232	CCCTCCGCCCAGTCTGAGGGCTCCTCAGCAGAGAGAGAACCTCCGAGAGTTGATGTTCAT[A/C]TTGGTCACGCCAATAAGCTTGAGTGGTGTGGAGAGGCTGAAGGAGGAGGCAAGAGGGGAG	37.5	8	11281918	FAM167A/C8orf12	EXON
rs73663131	GCCCAGGCCCTCCAGGCCTCTTTGATAGCTACTGAGCCCCTGAAGGCATCAAGACATGAC[T/C]ACGCATGGCAGTGTCGGTGGAGAGTTTGCGTTTTACACCCAGCGATGCTTGGGGATGGCA	37.5	8	11279221	FAM167A/C8orf12	EXON
rs146820615	ATCACCTTCCTCCCCTCCCATCAGATTGCATCTTGGAACTGAGGAGGTTC[T/C]GGAAGCTGTACACCCAAGGAAGACATTCTGTGCCGGAGAGAGAGTGGGAG	37.5	8	11292365	FAM167A/C8orf12	EXON
rs377142627	AGCTGCTAACATGTGTCTCTTCTTCTCTTTCCAGGGGAGGACCCGCAGATCCTGTAGACT[A/G]TCTGCCAGCAGCACCTCGGGGGCTCTACAAGGAAAGGGAGCTTCCCTATTATCCAGGGGC	37.5	2	206480206	PARD3B	EXON
rs143330409	TTTGTTGAGCAGAAAATGGGCGGGTGTCCCCACTGGAAGGTGATTGAGCAGAGATGGACC[A/G]AGGGCAGCTGACTGAACGTCTTATGGAGCCTATCAGTGATGGAGAAGAGGGATACTACAG	37.5	1	84373315	TTLL7/MIR548AP	EXON
rs114930230	TTTGCATTGTCCTACTCTCAGCCCACAAAAGAAAAGCAACCTCTCCCCTATGTGGGTCAC[A/G]ATGTGTGGGTGGACACGGGCCCCACTGAGATTACACAGGAAGAAGTCACAGTAGACAGAG	37.5	8	11280242	FAM167A/C8orf12	EXON
rs375773132	TGGGCGCAGGGGACTGCCACTTTCCATCTTCATGCTCTCCGTCAGTGACACCTGGTACTT[C/G]ACGCCGTCCTTGTCCTCTCCTCGGGCTGCACTACCCCCCGCGGAAGATGAGGCTGGAGAC	37.5	3	128204808	GATA2	EXON
rs35068677	GAGATGGAATTGGAATGGATTTAAAACTATCAAACCATGTTTTCAATGCTTTAAAACAAC[A/G]TGCCTACTCAGAAGAACGTCGAAGTGCCCGCCTACATGAGAAAAAGGAGCATTCTACAGC	37.5	18	21046179	RIOK3	EXON
rs371201139	CAGTGGAAACCCTGCAGATCGGCAGAGCCCAGATGCTTTTGAGACAGAAGTGGCCGCCCA[A/G]CTGGCCGCATTTAAGCCAATTGGTGGGGAGATTGAAGTAACCCCTTCTGCTCTAAAACTA	37.5	2	205829985	PARD3B	EXON
rs375169189	ATTACTCTTGTGTCTAGATTTCTGTCCATGCTAGAAGAAGAAGTATATAGTCAAAACTCT[T/C]CCATCTGGGATCAGGATTTTCTCTCAGCCTCTTCCAGAACCAGCCAGCTAGGCATCCAAA	37.5	3	20156417	KAT2B	EXON
rs376420351	CTGCATGCACTTTGACAGCTCCTCGAAGCACTCCGCCCCTTTCTTGCTCTTCTTGGACTT[A/G]TTGGACATCTTCCGGTTCCGAGTCTGGATCCCTTCCTTCTTCATGGTCAGTGGCCTGTTA	37.5	3	128200099	GATA2	EXON
rs369812781	ATCTTCCCTTGAGCAGCCAAACGCAGGGAGCAGCAGTCCTGCCTGCAAAGCCTCTTCTGG[A/C]CTTGAGGCAAACCCAGGTAAGCTCTTAAGAGGGGATAAGAGAGGGCTGTGACTTGCTCCA	37.5	3	20161199	KAT2B	EXON
rs140875842	GCGGGACAGCCTTCTGCAAAAATGACAGCTTTGTTGGGGGGCCTCCCTTT[C/G]GGAATCCCAGTTCATAGCACCAGTGATTCCAGGAAACAGGAACGTGACCG	37.5	8	11281537	FAM167A/C8orf12	EXON
rs368906452	GCACCTCGGGGGCTCTACAAGGAAAGGGAGCTTCCCTATTATCCAGGGGCTCATCCTATG[C/G]ACCCTCCCAAAGGGAGCTATCCCCGCCCCACAGAGCTCAGGGTGGCAGATCTCCGGTATC	37.5	2	206480277	PARD3B	EXON
rs368960774	TAGAGCTTACCCTGAATCACAGAAACAGTTCCACAGCCCTTGGCCACGACTCCAGAGTAA[A/G]CGATTAAAAACCCGGTTGAAAATCCGATATAAATTTACTTCTTCAACATCAGGCACCTTC	37.5	1	84356054	TTLL7/MIR548AP	EXON
rs145500471	CATCAACTATTGGCATCTGGAGGCACCATCTCAACGAAGACTGCGATCTCCCAATGATGA[T/C]ATTTCTGGATACAAAGAGAACTACACAAGGTAATCAGATGCAAGTTCTTTTCCTTTGGCC	37.5	3	20142931	KAT2B	EXON
rs368459570	CCAGTCTGAGGGCTCCTCAGCAGAGAGAGAACCTCCGAGAGTTGATGTTCATCTTGGTCA[T/C]GCCAATAAGCTTGAGTGGTGTGGAGAGGCTGAAGGAGGAGGCAAGAGGGGAGTCACAGAA	37.5	8	11281926	FAM167A/C8orf12	EXON
rs376027289	GCACATGGTTCGAGGCCGAGGCTGCAATGAGAGCTTTAGAGCAGCCATTGACAAATCCTA[T/C]GATGGACCTGAAGAAATAGAAGCTGGTAGGATGATATGCTTCCTTAAATGGCTTCTTCAT	37.5	2	206165435	PARD3B	EXON
rs369281184	AGTTCCACCTTCTCCAACACCACATTCTGCTCTGGGATTGGGCCTCGAAGATTACAGCCA[T/C]AGGTATTGATAAAATGATGTATCGTAAATGCTCCTTGTTATTGTTTTTCTGGGAGAACAC	37.5	2	206050585	PARD3B	EXON
rs111538108	GTCAGAAACACTCCTTATCTCAGGATTCTACGGGTCTGGCCGAGGGACCCCTGCCATGCC[A/G]TATGACCCCAGACTGACCTCCCTAACCTGCTGGGGTCTTAACTTGCTGATCCTCAAGCCT	37.5	8	11280725	FAM167A/C8orf12	EXON
rs182158104	ACTACTAAACATAGCCAAGCCAGAACATTCCTTCTGGATTAAGCCTAGGCCACTTGAGGG[C/G]CAGCCAGGGGTGATGGTGTCAGGTGAGAATCCTGTGTCTTGAAGGAGTGGCCTTTACAGG	37.5	2	206482674	PARD3B	EXON
rs201287031	GATGACCTACCACTTGAGAGTTGGTAGAGCAGGCATCATTACTGTGAGGCAGATGCCTCA[T/C]GTAGGAGGAAGCACGGTTTAAGGAATGTGACCGAGATGCAGAAGTTGGCCGTGACACAGA	37.5	1	84373189	TTLL7/MIR548AP	EXON
rs149419002	TCAACATACATCCACTTGGCTGCAGATCTGACTGCTGGGTCATGAAGGCC[A/G]TGAAATGATGTTTGCCCTCAAGTCACTAGATATTTTAAGAAGCCCTATTT	37.5	2	206483353	PARD3B	EXON
rs34172218	AGGGATCCAGACTCGGAACCGGAAGATGTCCAACAAGTCCAAGAAGAGCAAGAAAGGGGC[A/G]GAGTGCTTCGAGGAGCTGTCAAAGTGCATGCAGGAGAAGTCATCCCCCTTCAGTGCAGCT	37.5	3	128200072	GATA2	EXON
rs375051020	CTGCTGGTGAGGAGAAGCAGTGACCCAGTGCCAGGCCCACCTGCTGATACCCAGCCAAGC[A/G]CTTCACACCCTGGTGGCCAGAGTCTGAAACTGGTTGTTCCAGTAGGTATCCTGCTGCTTG	37.5	2	205912372	PARD3B	EXON
rs147272660	ATACTTAGAGGACAGCAACAGCACGTGAGACAGGCACATCTGACATGCCT[A/C]ATTTCCCCCAAGGCCCTTGCGGGACAGCCTTCTGCAAAAATGACAGCTTT	37.5	8	11281468	FAM167A/C8orf12	EXON
rs147708206	TGCCAGCAAAAGAAAGGCAAACAATAGTTGAGTTGGCAAAAATGTTCCTAAACCGCATCA[A/G]CTATTGGCATCTGGAGGCACCATCTCAACGAAGACTGCGATCTCCCAATGATGATATTTC	37.5	3	20142876	KAT2B	EXON
rs139424835	GAGTTGATGTTCATCTTGGTCACGCCAATAAGCTTGAGTGGTGTGGAGAGGCTGAAGGAG[T/G]AGGCAAGAGGGGAGTCACAGAAGAGGTCGGCCAGCTCATCCCGCTCCTCCAGCTCGTAGG	37.5	8	11281964	FAM167A/C8orf12	EXON
rs368769074	AGCCCCAGTGGAAACCCTGCAGATCGGCAGAGCCCAGATGCTTTTGAGACAGAAGTGGCC[A/G]CCCAACTGGCCGCATTTAAGCCAATTGGTGGGGAGATTGAAGTAACCCCTTCTGCTCTAA	37.5	2	205829980	PARD3B	EXON
rs77515572	GCCCTTCAAACACGCTGCTGAAGGGCAACTGGAGGTTCCGGGGAAATGTGAAGAAAGAAA[T/C]GCAAACACCCCTAGGAACCAGGTTGGTCTTGTGAATTGATTTCCAGAGGAAGGCTGGAGT	37.5	8	11291623	FAM167A/C8orf12	EXON
rs369451984	GCCAGGCAATGAAATCTCCAAGTGTGCTCCTCCACGTGCTTCCTCCACAAAACCGTGAAC[A/G]GTATGAAAAGTCAGTCATTGGCTCTCTTAACATTTTTGGTAATAATGATGGCGTTTTGAA	37.5	2	205986392	PARD3B	EXON
rs201058431	AGTCACAGAAGAGGTCGGCCAGCTCATCCCGCTCCTCCAGCTCGTAGGTGGCATCGTTGA[A/G]CATCCTCCTGTGGAGGCGGCAGGTGTGTTCGATTTTCAGCTTGTTGATGTCGCCACGCAG	37.5	8	11282037	FAM167A/C8orf12	EXON
rs371096438	CTTTGACAGCTCCTCGAAGCACTCCGCCCCTTTCTTGCTCTTCTTGGACTTGTTGGACAT[A/C]TTCCGGTTCCGAGTCTGGATCCCTTCCTTCTTCATGGTCAGTGGCCTGTTAACCTAGAGG	37.5	3	128200108	GATA2	EXON
rs146101762	CTGACTAACATTGAGCTTATCTCTGCAGCTTGACTTCTGGTATCCAGGTGCCACCCACCA[T/C]GTAGCTGCTAATATGATGGTGGATTTCCGAGTTAGTGAGAAGGAATCCCAAGCCATCCAG	37.5	3	148586734	CPA3	EXON
rs115866599	TTGCATCTTGGAACTGAGGAGGTTCTGGAAGCTGTACACCCAAGGAAGACATTCTGTGCC[A/G]GAGAGAGAGTGGGAGAGATGTGACTGCTGCTGGCTGGGTGAGGACAGGCCCAGAGGACAG	37.5	8	11292400	FAM167A/C8orf12	EXON
rs201666772	AAGTTGCGGAAAGAGTATTATCAGGCTCGGAGGGAAGGTTTCCCTTTATATGAAGACGAC[A/G]AAGGAAGAGCAAGGCCATCTGAGTATGACCTACTCTGGGTAAGCGCATGCATGATTTCAA	37.5	2	206364717	PARD3B	EXON
rs78934573	CTCAATCTGTCTCCACTCAAGAGGCTGATGGGCAGGTCTCCCTGCTTCTTCAAATCTTTC[A/G]AAGGTATCACGGGACCCTCCTGTTCCCTTGACCTCTCCAGCCTCCTCTCCCACTCTGATG	37.5	8	11292608	FAM167A/C8orf12	EXON
rs375164744	CCACTTAGAGGGTCTCTATGCCAAGGTCAACAAGCCATACCATCCACTGGTTCCAGCTGA[T/C]AGGTAATAAACTTAGTGAAAGATAAATGTAGCTTTAATTCAGTATGTTTCAAATCATCTC	37.5	2	206305394	PARD3B	EXON
rs144437234	GCAGATAACTATCGGGGCTCTGCACCAGAGTCCGAGAAAGAGACGAAAGCTGTCACTAAT[T/G]TCATTAGAAGCCACCTGAATGAAATCAAGGTTTACATCACCTTCCATTCCTACTCCCAGA	37.5	3	148601486	CPA3	EXON
rs192902177	GTGCCAGCACTTCTTGGACACCTCAACCCCCTCAGCTAAACCTGAGATCCAAGCGCTCCG[A/G]ATTCCAAACGTTTCCTCGAGCAGGTCCTCTCTAGCCGGCCGCTTATCTATGGTTTCTGCT	37.5	11	62439055	C11orf48	EXON
rs192416351	TACTTAGAGGACAGCAACAGCACGTGAGACAGGCACATCTGACATGCCTAATTTCCCCCA[A/C]GGCCCTTGCGGGACAGCCTTCTGCAAAAATGACAGCTTTGTTGGGGGGCCTCCCTTTGGG	37.5	8	11281479	FAM167A/C8orf12	EXON
rs369826402	TAGTCCTGAAACAGATGCATCAGCTTCCCTGCAACAAAACAAGAGTCCCCGAGTACCAAG[C/G]CTGGGAGGAAAACCATCCTCTCCCTCACTCTCGCCTCTCATGGGATTTGGCAGCAATAAA	37.5	2	205986579	PARD3B	EXON
rs373279771	GAAACAGATGCATCAGCTTCCCTGCAACAAAACAAGAGTCCCCGAGTACCAAGGCTGGGA[A/G]GAAAACCATCCTCTCCCTCACTCTCGCCTCTCATGGGATTTGGCAGCAATAAAAATGCAA	37.5	2	205986586	PARD3B	EXON
rs369199161	GTCCCGGTCCCATTTTTGTAAAAAACATTTTACCAAAGGGAGCAGCAATAAAAGATGGCC[T/G]CCTACAATCAGGGGACAGAATTTTGGAGGTAAGAATTGGAATTAATAGTTGTATGAAAAT	37.5	2	205989162	PARD3B	EXON
rs45528131	ATCTGGCCTTACTCTTAGTAGTTTTTAGTACGTGCTGGACACCACTTTTAAAAAGCAATC[A/C]CTGTGCTAGAAAAGTATATTGGCTTTGTTAGGATTAAAGTTCATTAACTTCAATGTAATC	37.5	18	21062591	RIOK3	EXON
rs142281309	GAAGTAGACCTAATTTTATGTGACTTGTGGTGTAAAATGTCTTGATGATA[A/G]TTTTTAAAACTTGGGTAACACTTCCAAATATGGGAGGAAAGGACAGATGT	37.5	18	21061543	RIOK3	EXON
rs369290033	AATTTCATTAGAAGCCACCTGAATGAAATCAAGGTTTACATCACCTTCCA[T/C]CCTACTCCCAGATGCTATTGTTTCCCTATGGATATACATCAAAACTGCCA	37.5	3	148601533	CPA3	EXON
rs146805080	GACTTAGAGCTTACCCTGAATCACAGAAACAGTTCCACAGCCCTTGGCCA[T/C]GACTCCAGAGTAAGCGATTAAAAACCCGGTTGAAAATCCGATATAAATTT	37.5	1	84356040	TTLL7/MIR548AP	EXON
rs138791103	TATGGCTTTAAAAAGCTGAAACCCCAACCTCTAAGTAGATCACAATGTTT[T/C]CTGAGCTTTGCAGTAATTTTCTATGGAAACTAAAACCTCTAAAACATACA	37.5	2	206481895	PARD3B	EXON
rs12962	AGCAGAAAGCATTATTTTGAAAGGTGATATACAGTGGGGCACAGAAAACAAATGAAAACC[T/C]TCAGTTTCTCACAGATTTTCACCATGTGGCTTCATCAATTTATGTGCTAATACAATAAAA	37.5	3	148614790	CPA3	EXON
rs201237224	TTGATAAGTAAGGAAGGTAGAGATATACTGCACCTTTGGTCCTCGAGTCTTGGTAGTTTT[T/C]CCCATCAACTTTTCATCATCAATTTCACATTGCTCCAGAAGATCCAAAATATCTTCTTCC	37.5	1	84383314	TTLL7	EXON
rs140365159	TTAATCAACTAATTTGAGCTATCTGGCCTTACTCTTAGTAGTTTTTAGTA[T/C]GTGCTGGACACCACTTTTAAAAAGCAATCACTGTGCTAGAAAAGTATATT	37.5	18	21062561	RIOK3	EXON
rs375410605	GGGAGAAGGTGTTCCGCGTGAAGCCCCAGGATGAAAAACAAGCAGACATC[A/G]AAAGGACTTGGCCAAAACCAATGAGGTAAGCATTTAGAGGGATATTTTAT	37.5	3	148583309	CPA3	EXON
rs149726379	ATGTTTCCTCACTTTTGATATGAAAGTCGGTAAAATGCAGTATTAGTCCC[A/G]GGAGGATGTGCACAGCTGGTCAGAGCTTCCAGAAGGAATATCTTCCGAGG	37.5	2	206481239	PARD3B	EXON
rs74406723	TCATTAGCTAAAGTCAGGTCAGGGCAGGGCCAAGGCCTCCAATTGGCAAAGGACAGTGTT[A/T]TGGCTTTAAAAAGCTGAAACCCCAACCTCTAAGTAGATCACAATGTTTTCTGAGCTTTGC	37.5	2	206481846	PARD3B	EXON
rs77619426	GTCTTGAGTTTAATTTAGGTCTATTTTGGCTGAGATTAGCATACCTCTGA[C/G]TCACAGGATTTAATAAATTATAGTATTATTGAATACATAGGACATCCCTC	37.5	2	206482130	PARD3B	EXON
rs372127593	TGAGAAAGTCTATTTTACAAAGAGGAAAACCTGTGGTTGAAGGCTCTTTGGAAAAGAAAC[A/C]CCCATTTGAAAAACCTAGCATTGAACAGGTAAAAAGATTTTAAAAGCCCTCTTTTTATTG	37.5	3	20141418	KAT2B	EXON
rs201323601	GAAAGGAAGGTCTGAAAGGCAACAGCTAACAAATTTTCATACTTTTCAAG[T/C]ATGCTTTATCTTCAGGAGGATAAATTCGTCTACAACAAAATCAGATAAAC	37.5	1	84385487	TTLL7	EXON
rs139777685	GAGTCCAATTTTATGAGCCAATATGAAGCCACTTTGGTTTTATGATACTTCCAGTTATCA[A/G]TGATCTGTTTGGAAGGAGGAACATTAAGAAATTTACAGGTTGAAACCCATTTTTTAAATT	37.5	1	84369838	TTLL7/MIR548AP	EXON
rs151213831	CCCGTTTTAAACTTCTTAATCTTATCATCAAGCAACACCAGGCTTCTAAA[T/C]CTTTTTGTTTCATTTAAAATGGCTACTATATATGAGAATTTTTAAGGTAT	37.5	1	84335165	TTLL7/MIR548AP	EXON
rs374453548	TTTTCAATTCAATATGCACAGCATCACATGCTTATGACTTTGTTTCACTATAGGATTCCA[T/C]GCAGAACTTGGAAGACAGAGAAGTTTTGAATGGTGTACAGACAGAACTACTAACTTCGCC	37.5	2	205969157	PARD3B	EXON
rs68050031	TATCAGCATAAATAAAATGGTCATGAATAGTCATTAAAAACAGTTGCCAGTGATAATCTG[T/C]ATGAAGGAAAAAGAACCCTGCAAATGGCTATTGAGTTGGAAGTATTGTTTTTGATATGTA	37.5	3	20195395	KAT2B	EXON
rs200639407	CATGTGCAGATAACTATCGGGGCTCTGCACCAGAGTCCGAGAAAGAGACGAAAGCTGTCA[T/C]TAATTTCATTAGAAGCCACCTGAATGAAATCAAGGTTTACATCACCTTCCATTCCTACTC	37.5	3	148601481	CPA3	EXON
rs367987625	TCCAATTGAGGTCTTACATATGTTTCTTTGATCTTATCATAAGCTGCTCATGTTTCCCAC[T/C]TGGAGAATGTGTCAGAGGAAGAAATGAACAGACTCCTGGGAATAGTATTGGATGTGGAAT	37.5	3	20136772	KAT2B	EXON
rs370702778	CCCTCACTCTCGCCTCTCATGGGATTTGGCAGCAATAAAAATGCAAAGAAAATTAAGATT[T/G]ACCTAAAGAAAGGTAATTATTAAATTATGCCTAATAGCATTCTATTATTGTAACATGTAA	37.5	2	205986661	PARD3B	EXON
rs35424474	AGAGATAGACATACCAATTAAGTTTTTCTTTTTCTTTTTTTTAATGATTTCTTTGCAGCT[T/C]TTGAGAAAGTCTATTTTACAAAGAGGAAAACCTGTGGTTGAAGGCTCTTTGGAAAAGAAA	37.5	3	20141356	KAT2B	EXON
rs184263350	TCTACACAAATGTGTAATATCATATTTGACTTTGCTTATGCAGGCCATAAGTTCCAAAAG[A/T]TAATTTCCCTGCCCACAAAGGCATAAACTTGAAAACACATGAGATTGAATCAACATGCTT	37.5	3	20194790	KAT2B	EXON
rs368937222	AAAACCCGGTTGAAAATCCGATATAAATTTACTTCTTCAACATCAGGCACCTTCCAGATG[T/C]GTGGAAGAACTGTACGAATACTTGTTTTCACTATGTCCAAAACCTAGTGGAAAAACCAAA	37.5	1	84356121	TTLL7/MIR548AP	EXON
rs199677857	TGAGAACAAATAAGGTCTGACTTGTTAGATCATCTTCTTGTTCTTTTGTTTTCAGTTGCC[A/G]CAAAGACTCACTCTTAAATTTGAAAGAATACAGATATTTGGAGGGGGTCTTATTTCATTG	37.5	1	84372134	TTLL7/MIR548AP	EXON
rs140584102	TTGGTAGTTTTTCCCATCAACTTTTCATCATCAATTTCACATTGCTCCAGAAGATCCAAA[A/G]TATCTTCTTCCTTCAAAAAATATTCTAATTAAAATTACAACCACTAATGGACTCTAGAAT	37.5	1	84383363	TTLL7	EXON
rs112825175	CCAACGTGCAGAGAGACCATGCTAGCTGTCAAATTTATTGCCAAGTATATCCTCAAGCAT[A/G]CTTCCTAAAGAACTGCCCTCTGTTTGGAATAAGCCAATTAATCCTTTTTTGTGCCTTTCA	37.5	3	148614486	CPA3	EXON
rs146453393	TTCAAATTATTGCTGAGGAAAGACTGTTATAATTGTGGAATGGCATAATCTTACTGAAAT[A/G]TCACTCCAAAACTTAGCAACATCATGTTGATTTGCTTGAAGGAATTCTGTAAACCATTTG	37.5	1	84403541	TTLL7	EXON
rs74454488	TGACATTTGAAATGCTTTAAGCCTTTTCACATTCCTTCTTTATTCCCTCCAAAAAAAAAA[T/G]TCTTGAGTTTAATTTAGGTCTATTTTGGCTGAGATTAGCATACCTCTGACTCACAGGATT	37.5	2	206482080	PARD3B	EXON
rs146501001	GGTGCATATGTGCATATATTTTCACACATATATATGTCTTATATACATAA[A/C]ACAGCACTTAATGGTCATGTTCTTTGCATGTTCAACTTCAGAGGAAAAAA	37.5	1	84335549	TTLL7/MIR548AP	EXON
rs146235151	TCTAATTTCTCAAAATTGATTTTGCTCTTAAGATTGTGGCTTGGACTGAAAAGATGATGG[A/C]TAAGTATCCTGAAATGGTCTCTCGTATTAAAATTGGATCTACTGTTGAAGATAATCCACT	37.5	3	148596462	CPA3	EXON
rs185372937	TAAAATTAATATATTGTACTGGTACAAAATAGTTTTAAATTATATTTTAAAAAGCTTCCA[A/G]TCTTGTGGTGTGTTTTATTCATTCAGTAGGCTGAGGTTAACAGAACAAATTATGATCTGG	37.5	3	20195896	KAT2B	EXON
rs75618111	AATAACTTAGTTCACTAATCCAAAATAAAACAAGCCAAATAAAACATAAAAACAGAAAAT[A/C]CTGCCGATTCTTTTTCTTATGCGGACACTAGTACAAAATAAGTTACTTCTGGCCGTGGTG	37.5	3	128198434	GATA2	EXON
rs149508045	TGATGTATAACACCTCCATATTTTGTAACATAGTTAAGTCAATTTCCCTACCTCCTTCTT[C/G]AGGCAGAGATGGCATTATTGCCTGTGCTGATTAGCAAGCAGTGTGTGCTGCTGTACCAAG	37.5	1	84417879	TTLL7	EXON
rs118087984	CCTTCCTCCCCTCCCATCAGATTGCATCTTGGAACTGAGGAGGTTCTGGAAGCTGTACAC[A/C]CAAGGAAGACATTCTGTGCCGGAGAGAGAGTGGGAGAGATGTGACTGCTGCTGGCTGGGT	37.5	8	11292379	FAM167A/C8orf12	EXON
rs374889176	GCATCATTACTGTGAGGCAGATGCCTCATGTAGGAGGAAGCACGGTTTAAGGAATGTGAC[A/C]GAGATGCAGAAGTTGGCCGTGACACAGATATCATTTGTTGAGCAGAAAATGGGCGGGTGT	37.5	1	84373221	TTLL7/MIR548AP	EXON
rs138181056	GGGAGCAGACTGTGGTCTCATCCACCTATGTCTTCTGCAGCCATTCCTAACACCAATGAC[C/G]CATGTGCAGATAACTATCGGGGCTCTGCACCAGAGTCCGAGAAAGAGACGAAAGCTGTCA	37.5	3	148601420	CPA3	EXON
rs370118118	AGCAAAACAGATGACCTACCACTTGAGAGTTGGTAGAGCAGGCATCATTACTGTGAGGCA[C/G]ATGCCTCATGTAGGAGGAAGCACGGTTTAAGGAATGTGACCGAGATGCAGAAGTTGGCCG	37.5	1	84373180	TTLL7/MIR548AP	EXON
rs73663132	CTCAGCCCACAAAAGAAAAGCAACCTCTCCCCTATGTGGGTCACGATGTGTGGGTGGACA[T/C]GGGCCCCACTGAGATTACACAGGAAGAAGTCACAGTAGACAGAGCAGCCAGATGCCGTGC	37.5	8	11280258	FAM167A/C8orf12	EXON
rs377475879	GAAAATGACTGATTCTCATGTTCTGGAGGAGGCCAAGAAACCCCGAGTTATGGGGGATAT[T/G]CCGATGGAATTAATCAACGAGGTTATGTCTACCATCACGGACCCTGCAGCAATGCTTGGA	37.5	3	20164230	KAT2B	EXON
rs371669668	AAAAGGAAAAGGGCAAATTGAAAGTCAAGGAGAAAAAGCGCAAAGAGGAGAATGAAGATC[T/C]AGAAAGGAAAATAAAGAAGAAGGGCTTCGGCGCCATGCTGAGGTATGGGCCTGCTTTGAA	37.5	2	206166383	PARD3B	EXON
rs116711221	TACTGTAATGACTGATTTCCAAAAAGAAAGAAAAACCTAATTTGGCATTTTTTCAGAATA[T/C]GGGATGGGCTTTCCTGCATGGGTTCAAGGATGTTTATGGCATGTTCTCTGTCGTGTGTGT	37.5	8	11279812	FAM167A/C8orf12	EXON
rs142782812	GCTGAAGGGCAACTGGAGGTTCCGGGGAAATGTGAAGAAAGAAACGCAAA[T/C]ACCCCTAGGAACCAGGTTGGTCTTGTGAATTGATTTCCAGAGGAAGGCTG	37.5	8	11291629	FAM167A/C8orf12	EXON
rs141209260	GGCCAGGGGCCCCTCACAGGCCACCACACCCCGCCGTCACCGCATACAGAATCTAAGCTC[A/G]GGACACGTTTATATACAGCTGTACCTTGGGAAGGATCCAGACAGCCACAGTAAAGCTGGA	37.5	3	128198619	GATA2	EXON
rs201558858	TTGCATTTAGGATTCTAGGACTCTTCATCCGAGGCATTGAAGACAACAGCAGGTCCAAGC[A/G]GGAGGGACTATTTCACGAAAATGAATGTATTGTAAAAATCAACAATGTGGATCTCGTAGA	37.5	2	205983695	PARD3B	EXON
rs372737843	TTCTCTTTCCAGGGGAGGACCCGCAGATCCTGTAGACTATCTGCCAGCAGCACCTCGGGG[A/G]CTCTACAAGGAAAGGGAGCTTCCCTATTATCCAGGGGCTCATCCTATGCACCCTCCCAAA	37.5	2	206480228	PARD3B	EXON
rs141445570	ATGAGGCGGCAAGGTTGGAAGAGCGCAGGGGTGTAATTGAATTTCACGTGGTTGGCAATT[T/C]CCTCAACCAGAAACCAAACAAGAAGATCCTGATGTGGCTGGTTGGCCTACAGAACGTTTT	37.5	3	20167488	KAT2B	EXON
rs374260846	GTGCACTCTCTCTGGAGACAAGCGAGCAGCTCACCTTTGAGATCCCCCTGAATGATTCAG[T/G]TTCTGCTGGCCTCGGGGTGAGCTTAAAAGGGAACAAATCCAGAGAAACTGGAACAGACTT	37.5	2	206023525	PARD3B	EXON
rs150239973	TTTCATGTGTATTCCCCTAACAGAAAGGAGAACCTGACTGCTGTGCACTCTCTCTGGAGA[A/C]AAGCGAGCAGCTCACCTTTGAGATCCCCCTGAATGATTCAGGTTCTGCTGGCCTCGGGGT	37.5	2	206023483	PARD3B	EXON
rs375993645	TTGTCACAGGTGGCTGTGTTACTGCAACGTGCCACAGTTCTGCGACAGTCTACCTCGGTA[T/C]GAAACCACACAGGTGTTTGGGAGAACATTGCTTCGCTCGGTCTTCACTGTTATGAGGCGA	37.5	3	20153139	KAT2B	EXON
rs149158367	GACAAGCGAGCAGCTCACCTTTGAGATCCCCCTGAATGATTCAGGTTCTG[T/C]TGGCCTCGGGGTGAGCTTAAAAGGGAACAAATCCAGAGAAACTGGAACAG	37.5	2	206023531	PARD3B	EXON
rs183151050	AGAAAAGCAACCTCTCCCCTATGTGGGTCACGATGTGTGGGTGGACACGGGCCCCACTGA[A/G]ATTACACAGGAAGAAGTCACAGTAGACAGAGCAGCCAGATGCCGTGCGTAGACCATGGGA	37.5	8	11280271	FAM167A/C8orf12	EXON
rs147423849	TCCCTGAGAAAGAGCCAGATTAACGCTGGCAGGAAAGAAAGCAGGAGTGCCCTTCAAACA[T/C]GCTGCTGAAGGGCAACTGGAGGTTCCGGGGAAATGTGAAGAAAGAAACGCAAACACCCCT	37.5	8	11291575	FAM167A/C8orf12	EXON
rs374341362	AGACGGTCTGTCTGATAAGAGCTCTCACTCTGGCCAAGGAGCTCTGAATTGTGAGTCTGC[T/C]CCTCAGGGGAATTCGGAGCTAGAGGACATGGAAAATAAAGCCAGGAAAGTCAAAAAAACg	37.5	2	206166246	PARD3B	EXON
rs61733454	GGCAAATTTGGTTTTCTCCTTCCAGAATCCCGGATAAAGCCAACGTGCAGAGAGACCATG[T/C]TAGCTGTCAAATTTATTGCCAAGTATATCCTCAAGCATACTTCCTAAAGAACTGCCCTCT	37.5	3	148614447	CPA3	EXON
rs376477710	TTTATCAACTTTCTTTCCAGGGCTCAAGATGTCTTCCGCCAGGCAATGAAATCTCCAAGT[C/G]TGCTCCTCCACGTGCTTCCTCCACAAAACCGTGAACAGTATGAAAAGTCAGTCATTGGCT	37.5	2	205986355	PARD3B	EXON
rs202091530	TAAGTCAATTTCCCTACCTCCTTCTTGAGGCAGAGATGGCATTATTGCCTGTGCTGATTA[C/G]CAAGCAGTGTGTGCTGCTGTACCAAGCTCTCAGGAAATCTGGAAATTCCACATTAGTCTA	37.5	1	84417913	TTLL7	EXON
rs148713533	GAAATACCAAAACCTGAGGAGTGGGCAATGGTGCTTCTGTGCTTTTCCCC[T/C]TTGTAACCCATGTGCCAGATGTGTGGAATTTTTAGCTCAGCATTGAGAGA	37.5	18	21061371	RIOK3	EXON
rs144838125	TGGGGGGCCTCCCTTTGGGAATCCCAGTTCATAGCACCAGTGATTCCAGGAAACAGGAAC[A/G]TGACCGTGGAGGGATGGATTATGGTGGGAACCCAGGTCTCCTTTAACATCTTGGTTGGAG	37.5	8	11281581	FAM167A/C8orf12	EXON
rs371022010	TTTCTCTGTACAGACGGTCTGTCTGATAAGAGCTCTCACTCTGGCCAAGGAGCTCTGAAT[T/G]GTGAGTCTGCCCCTCAGGGGAATTCGGAGCTAGAGGACATGGAAAATAAAGCCAGGAAAG	37.5	2	206166235	PARD3B	EXON
rs112746311	GGGGGCCTCCCTTTGGGAATCCCAGTTCATAGCACCAGTGATTCCAGGAAACAGGAACGT[A/G]ACCGTGGAGGGATGGATTATGGTGGGAACCCAGGTCTCCTTTAACATCTTGGTTGGAGCG	37.5	8	11281583	FAM167A/C8orf12	EXON
rs370874606	AGTCCAACCACGAAGCTATGGAAACACTTAGGCGGTCAATGTCCATGGAGGGAAACATCC[A/G]AGGGATGATCCAGTTGGTGATTCTGAGGAGGCCAGAGAGACCAATGGAGGTGATGCAAAT	37.5	2	206037056	PARD3B	EXON
rs147958697	GGAGAGTTTGCGTTTTACACCCAGCGATGCTTGGGGATGGCAGAGAGATGGATGGATAAT[A/G]AGTACAACTGCAAACAGCACTGTACACATGTGGTGAGCCAGGAGGCTGGGACGGAGGTTA	37.5	8	11279300	FAM167A/C8orf12	EXON
rs115534458	CTGGGAAATGCCAAGTCCAGACTCAGTGCCAAGCAGTAACCATCTGCACTCGGGGACAGC[A/G]AGGAGCTGACCATGGCCTCTGATGACCAGCAGGTATTAGATGGAAGTGAATGAGAGAGAG	37.5	2	206481561	PARD3B	EXON
rs145609368	TTCCTCACTTTTGATATGAAAGTCGGTAAAATGCAGTATTAGTCCCGGGA[A/G]GATGTGCACAGCTGGTCAGAGCTTCCAGAAGGAATATCTTCCGAGGACTA	37.5	2	206481243	PARD3B	EXON
rs370509092	AACCATGAGGCTCATCCTGCCTGTGGGTTTGATTGCTACCACTCTTGCAATTGCTCCTGT[A/C]CGCTTTGACAGGTAAATCTTACTTCCTGTGTTCCAGTCTCTGTGTAGAAGAGAATTAAAG	37.5	3	148583151	CPA3	EXON
rs73203415	ACCTGACAAGACAGGCTGTGGCTTGCGCTCAGTAAGGGGACACAGTCACAGCAGCTTCGG[T/C]CTCAAAGCCAAGGGAGCGATCTGGGAGACGTTTCCCCTTTCAAGAAAATGTTGTTTCCTT	37.5	3	128199147	GATA2	EXON
rs73663136	TTATTTTCGTCAGTGTTGTGCAGGAGAATCCACTTAGAAGCCTGGGTAAAATTGTATTAC[A/G]TGATCTTGGGTTTGGTCCCTGAGAAAGAGCCAGATTAACGCTGGCAGGAAAGAAAGCAGG	37.5	8	11291499	FAM167A/C8orf12	EXON
rs201397595	CCTAAACCGCATCAACTATTGGCATCTGGAGGCACCATCTCAACGAAGACTGCGATCTCC[A/C]AATGATGATATTTCTGGATACAAAGAGAACTACACAAGGTAATCAGATGCAAGTTCTTTT	37.5	3	20142922	KAT2B	EXON
rs182505736	GAATCACACACAGCCTGACTTTTAAAGACAAGCTTGGCTACAGGAAATGAACCAACCCCA[A/G]AGACTCTTCTAACCTGTCTCCTGACTGGGCTCCTTCAGAAAGTGTTCTCCTGTTCCATCT	37.5	2	206484543	PARD3B	EXON
rs371223739	CCCTCGAGCTGGACCATTTGGTTACCCTCGGGATGGCCATCCACTGTCTCCAGAAAGAGA[A/C]CACTTAGAGGGTCTCTATGCCAAGGTCAACAAGCCATACCATCCACTGGTTCCAGCTGAC	37.5	2	206305334	PARD3B	EXON
rs375298899	TGGGGATGGGGTGGTGTGTAGCAGGCTGGGTGCCCATAGTAGCTAGGCCTGGGCGCAGGG[T/G]ACTGCCACTTTCCATCTTCATGCTCTCCGTCAGTGACACCTGGTACTTGACGCCGTCCTT	37.5	3	128204759	GATA2	EXON
rs148646828	GAGGGATTTGGACTCAGAAACAGCCACAGAAGTATTTCTCAGCACTCCCAGTTCCTGCCA[A/G]CTTAGCTGGAAACGATGCCACAGCGAGACCAGAAAGAGGAGTCGCCTTAAGGTATCCCTA	37.5	2	206484295	PARD3B	EXON
rs201512513	ACAGTGGAGATTTCTGGGGAAGGAGGCCCATTGGGAATACATGTAGTGCCCTTCTTTTCA[-/TCT]TCTCTGAGTGGAAGGTAAGATGTTTTTCTCATTCCAGAAGCTCATGCTAATGAAAACCCT	37.5	2	205978287	PARD3B	EXON
rs111919051	CCGTGACACAGATATCATTTGTTGAGCAGAAAATGGGCGGGTGTCCCCACTGGAAGGTGA[T/C]TGAGCAGAGATGGACCGAGGGCAGCTGACTGAACGTCTTATGGAGCCTATCAGTGATGGA	37.5	1	84373298	TTLL7/MIR548AP	EXON
rs111593746	AGATAAGGGCTGAGGCATAAAACTGCCAGAGGGTCTCAAGGCAGGCAAAGAAGAACCATG[A/G]GGCTCATCCTGCCTGTGGGTTTGATTGCTACCACTCTTGCAATTGCTCCTGTCCGCTTTG	37.5	3	148583098	CPA3	EXON
rs199499869	GGCAGGCAAAGAAGAACCATGAGGCTCATCCTGCCTGTGGGTTTGATTGCTACCACTCTT[A/G]CAATTGCTCCTGTCCGCTTTGACAGGTAAATCTTACTTCCTGTGTTCCAGTCTCTGTGTA	37.5	3	148583137	CPA3	EXON
rs114531478	TAATATGATGGTGGATTTCCGAGTTAGTGAGAAGGAATCCCAAGCCATCCAGTCTGCCTT[A/G]GATCAAAATAAAATGCACTATGAGTAAGTCCTTGGCAAATATTGAAATTTGTTGGATATT	37.5	3	148586803	CPA3	EXON
rs145229375	GTTGCTGGGATGTGCCTTGTGTTGCTACACAAACAGCGATCCCGAAGTCT[A/G]CCAGCAAGATAGATGGCCTGGAGTCCAGAACAGACTGGATTAGTGAAAGC	37.5	8	11225883	TDH	EXON
rs201248681	CAGTTAATGGGGAATCTCTTTTGGGAAAGTCCAACCACGAAGCTATGGAAACACTTAGGC[A/G]GTCAATGTCCATGGAGGGAAACATCCGAGGGATGATCCAGTTGGTGATTCTGAGGAGGCC	37.5	2	206037029	PARD3B	EXON
rs189200811	CAATTTACACAGCCTTATAGTGTCAGGCTCACCAGAGACACTGGCTGCCAGCCACTGGGG[T/C]TGCGTCCCCAAGTGCCCATTTGTCATGCCTTTCGATTTTCCCTTCCTAGTAGCTCCCTGT	37.5	8	11281317	FAM167A/C8orf12	EXON
rs143039052	CGGGCCCCACTGAGATTACACAGGAAGAAGTCACAGTAGACAGAGCAGCCAGATGCCGTG[T/C]GTAGACCATGGGACAGTGATTAGTGACACATGCCCTGTGGGGCCACTGTCAGTGCCTTGC	37.5	8	11280318	FAM167A/C8orf12	EXON
rs186755520	GTTTTGTGTTGCATACAAAGTCAATAAAATAGTTGCTAATCCTGAATGGCAGCCAGTGAT[A/G]TGAAGGTACTATTAAAGTGAACAAAAACTAGATTGCAACAGTTTTCTTTCCTTGCTTGAA	37.5	2	206482885	PARD3B	EXON
rs376999632	TTGATTCATGATCTACAAGAAGAGATTGAGAAACAGTTTGATGTTAAAGAAGATATCCCA[A/G]GCAGGCACAGCTACGCAAAATACAATAATTGGGAAAAGGTACAGTAAAAAATGCCTGTAC	37.5	3	148596292	CPA3	EXON
rs373309024	GAATCACAGAAACAGTTCCACAGCCCTTGGCCACGACTCCAGAGTAAGCGATTAAAAACC[T/C]GGTTGAAAATCCGATATAAATTTACTTCTTCAACATCAGGCACCTTCCAGATGCGTGGAA	37.5	1	84356067	TTLL7/MIR548AP	EXON
rs200106653	TGGTTGTTCACTGCCAAAACTGTGGCATTTTCATTACAGGAGAGTTTACTATGCTAAAAG[A/C]AAAAAACAAAAAAAAAAAAAAAGGGAAGAAGGAAAAAAGCACAAAACAATTTGAAGATAT	37.5	6	153332041	RGS17	EXON
rs188163066	TTTTACTTACTTTCAGTAGCACCATAACGAAGTAGCTTTAAGTGAAACCTTTTAACTACC[T/G]TTCTTTGCTCCAAGTGAAGTTTGGACCCAGCAGAAAGCATTATTTTGAAAGGTGATATAC	37.5	3	148614701	CPA3	EXON
rs371626267	TTTAAGCCTTTTCACATTCCTTCTTTATTCCCTCCAAAAAAAAAAGTCTT[T/G]GTTTAATTTAGGTCTATTTTGGCTGAGATTAGCATACCTCTGACTCACAG	37.5	2	206482085	PARD3B	EXON
rs186226992	CCATAATAAAGTTCTCTTAGGATAAACCGAGCAAAATAGCTCAGACATTTAACTTATCCC[C/G]AAACATGTGTCTTGATCTTAGTTTCCACCCAGAGAATGAAGAAAGCAAGCAAGCACTGGG	37.5	8	11279593	FAM167A/C8orf12	EXON
rs79380124	TCTGGATGTAAACAAAACATTGGAGCGAGTCATTCCAGGTGAATTGTACTTCAAGTTGTA[A/G]GTTGGTGTTCTCAAGAAGAATTGGGTGCTCCCTGGTAGTAAATACCTAAAAATGATGGTT	37.5	1	84335720	TTLL7/MIR548AP	EXON
rs370747287	CAAATTGAAAAATGCAAACTGATCTTGTGTAAACACTTACGTCATTCAATCTGGCAGAAC[T/C]GCATGTGGAGAAAAAATCGTTCCAAGAACCAAAACTCCAAATGCATCGGCACTGACCTCA	37.5	3	148600295	CPA3	EXON
rs145508637	GGAGCGAGTCATTCCAGGTGAATTGTACTTCAAGTTGTAGGTTGGTGTTCTCAAGAAGAA[T/C]TGGGTGCTCCCTGGTAGTAAATACCTAAAAATGATGGTTAACAAATTAGATTTTTACAAG	37.5	1	84335741	TTLL7/MIR548AP	EXON
rs199671298	CTCCTGCTGAACAGCAGAATCACACCATATAAGATTACTTGTTTCATCCTCATCTGGAGT[T/C]TTCATAAATCCCATTTCATCTATTACTAAACGAACTGCAAGTAAACAGTTAAGTTAAACC	37.5	1	84415635	TTLL7	EXON
rs140411214	CTACTCCCAGATGCTATTGTTTCCCTATGGATATACATCAAAACTGCCACCTAACCATGA[A/G]GACTTGGTACGTAGACAAAAGTTTGCACTTCATGCATCGACAATACCATTGACTTTCAGT	37.5	3	148601596	CPA3	EXON
rs372539532	AAACCCGGTTGAAAATCCGATATAAATTTACTTCTTCAACATCAGGCACCTTCCAGATGC[A/G]TGGAAGAACTGTACGAATACTTGTTTTCACTATGTCCAAAACCTAGTGGAAAAACCAAAG	37.5	1	84356122	TTLL7/MIR548AP	EXON
rs146641016	AACTTTCCTTTCTCTCCAGGCCAAAGTTGCAAAGATTGGCACTGATGTTCTATCAACTCG[A/G]TATGAAACCCGCTACATCTATGGCCCAATAGAATCAACAATTTGTAAGTCATTCCTCTTA	37.5	3	148603921	CPA3	EXON
rs368374752	GTCCGAGAAAGAGACGAAAGCTGTCACTAATTTCATTAGAAGCCACCTGAATGAAATCAA[A/G]GTTTACATCACCTTCCATTCCTACTCCCAGATGCTATTGTTTCCCTATGGATATACATCA	37.5	3	148601515	CPA3	EXON
rs190912995	GCCCTCAAGTCACTAGATATTTTAAGAAGCCCTATTTTTCTCCCTTTTTGCAGGAGTAGA[A/G]AGATGAAAGAGGACAGACCATTGAAAACTTTTAGATGCAGGAGAATTGAGACTTCCACAA	37.5	2	206483427	PARD3B	EXON
rs74351592	TTTGTAGTGGTTGGAGGGTTTAAGATTATATGTAACTTGCTTTTCTCTTTTCTTATTTTG[T/G]TACTCTTCTTTTTCATTTTCGTCAGATTCTGAAGAGCTGCTGCTACTATCATAACTGCTG	37.5	1	84376924	TTLL7/MIR548AP	EXON
rs141010149	AACTTCCACACAGGGCTATGGAACACACCTGATGAATCATTTGAAAGAATATCACATAAA[A/G]CATGACATCCTGAACTTCCTCACATATGCAGATGAATATGCAATTGGATACTTTAAGAAA	37.5	3	20178481	KAT2B	EXON
rs142548774	CTATATCAAGGATTATGAAGGAGCCACTTTAATGGGATGTGAGCTAAATCCACGGATCCC[A/G]TACACAGAATTTTCTGTCATCATTAAAAAGCAGAAGGAGGTAAGCAGGTGGTTGACTCCC	37.5	3	20181817	KAT2B	EXON
rs80348816	AGACAACAGCAGGTCCAAGCGGGAGGGACTATTTCACGAAAATGAATGTATTGTAAAAAT[T/C]AACAATGTGGATCTCGTAGACAAAACCTTTGCTCAGTAAGCATTTTTTCATTGTTTTATT	37.5	2	205983735	PARD3B	EXON
rs200899484	TAAACTTCATACCAATAGCTTAATTTTTTTTCACCTCCGACAGGCAACCAAAACTTATGG[A/G]AGAAACAAAATTATGACCAAACTCTTGGACCGAATGAATTTTTACATTCTTCCTGTGTTC	37.5	3	148599326	CPA3	EXON
rs374597941	CCTCATACCACTAACTGGTCATGATTAATTTCCTACCTGATAATTTTGCAGCTCTGAAAT[T/C]TTCTCCTGCTGAACAGCAGAATCACACCATATAAGATTACTTGTTTCATCCTCATCTGGA	37.5	1	84415572	TTLL7	EXON
rs35324938	AAGAACCAAAACTCCAAATGCATCGGCACTGACCTCAACAGGAATTTTAATGCTTCATGG[-/G]AACTGTGAGTAGCAGACTTGCTATCAAGGAAAATTGCTATAAGGAATATTTAGGTCCCAA	37.5	3	148600378	CPA3	EXON
rs149879184	TAAATAGATTGGGGAAAAGAATGAAAGAAGAAAGGCTATTTTTACGGATTGTGGCATTCA[T/C]GCACGAGAATGGGTCTCCCCAGCATTCTGCCAGTGGTTTGTCTATCAGGTAAGTGAATCA	37.5	3	148597628	CPA3	EXON
rs376842250	AGGTCTTCTTGATTATGCTACTGGTGCAATTGGATCAGTGTATGATATGGATGATGATGA[A/C]ATGGACCCCAATTATGCCAGAGTGAACCACTTTCGGGAACCATGCACATCAGCAAATGTC	37.5	2	206305196	PARD3B	EXON
rs61733453	AAATTTGGTTTTCTCCTTCCAGAATCCCGGATAAAGCCAACGTGCAGAGA[T/G]ACCATGCTAGCTGTCAAATTTATTGCCAAGTATATCCTCAAGCATACTTC	37.5	3	148614440	CPA3	EXON
rs202036389	GCCATATCTGGATGTAAACAAAACATTGGAGCGAGTCATTCCAGGTGAATTGTACTTCAA[A/G]TTGTAGGTTGGTGTTCTCAAGAAGAATTGGGTGCTCCCTGGTAGTAAATACCTAAAAATG	37.5	1	84335714	TTLL7/MIR548AP	EXON
rs200876907	CAAATGAATGAAAAGATAAGCTCTGTCTGGTATCACTTACCAAATTGGACTCATTAGGTG[T/G]AATGTACTTCTCTGTACCCATTCGCACAAGCCCATCATGGTAGAGAAATATTTTTAGTGG	37.5	1	84408166	TTLL7	EXON
rs375413795	TTTAACATAGATTAGGTCATTAAACTTGTGTTTGTTCTACTATAGGGTCCTGGTTACTGG[T/G]TGAAGATTCATCACTTAGAATATACAGATGGAGGAATCCTGGATCCAGATGATGTCTTGG	37.5	2	205550919	PARD3B	EXON
rs112827657	TACTCACTTTTCGTTGTTTTACAGAGTCCAATTTTATGAGCCAATATGAAGCCACTTTGG[T/C]TTTATGATACTTCCAGTTATCAATGATCTGTTTGGAAGGAGGAACATTAAGAAATTTACA	37.5	1	84369815	TTLL7/MIR548AP	EXON
rs75780220	TGCTCACACTGAAAATGCCTCAACTTTTTAAAGTGTAAGAAACCACCATGAGTGGTGTCT[A/G]GATTTCTAATGAAGAATCATGATACAGTTTGGATTAAGTATCTTGGACTGGTTTTAAACA	37.5	3	20195530	KAT2B	EXON
rs191422571	AAAATACTGCCGATTCTTTTTCTTATGCGGACACTAGTACAAAATAAGTTACTTCTGGCC[A/G]TGGTGCTCCCTGCAGCGACTGCCCGCCCATATTGCACTTGGTCACTACATCAGCACAATC	37.5	3	128198489	GATA2	EXON
rs368241341	AAACCCTTGCTTTAATTAAAGATGGCCGTGTTATTGGTGGTATCTGTTTCCGTATGTTCC[T/C]ATCTCAAGGATTCACAGAGATTGTCTTCTGTGCTGTAACCTCAAATGAGCAAGTCAAGGT	37.5	3	20168983	KAT2B	EXON
rs61741390	CCCCAATTATGCCAGAGTGAACCACTTTCGGGAACCATGCACATCAGCAAATGTCTTTAG[A/G]TCTCCATCTCCCCCTCGAGCTGGACCATTTGGTTACCCTCGGGATGGCCATCCACTGTCT	37.5	2	206305262	PARD3B	EXON
rs4624992	ACGCTGGCAGGAAAGAAAGCAGGAGTGCCCTTCAAACACGCTGCTGAAGGGCAACTGGAG[A/G]TTCCGGGGAAATGTGAAGAAAGAAACGCAAACACCCCTAGGAACCAGGTTGGTCTTGTGA	37.5	8	11291597	FAM167A/C8orf12	EXON
rs201211082	CTAGGCCCTGAAGGACTTGGTTTCACTGTGGTTACCAGAGACTCTTCCATACATGGTCCC[A/G]GTCCCATTTTTGTAAAAAACATTTTACCAAAGGGAGCAGCAATAAAAGATGGCCGCCTAC	37.5	2	205989107	PARD3B	EXON
rs375827840	TCATTTGCATTGTCCTACTCTCAGCCCACAAAAGAAAAGCAACCTCTCCC[C/G]ATGTGGGTCACGATGTGTGGGTGGACACGGGCCCCACTGAGATTACACAG	37.5	8	11280229	FAM167A/C8orf12	EXON
rs147314004	AAGTGCATCCTTATGAAGACAGCGATAGCTCTGAAGATGAGGTTGACTGGCAGGATACTC[A/G]TGATGATCCCTACAGACCAGGTACCAAAGTTTTTACTTTCTGGGGGCAGCAGAATAGAGG	37.5	18	21044257	RIOK3	EXON
rs145076941	CGCCCCTTTCTTGCTCTTCTTGGACTTGTTGGACATCTTCCGGTTCCGAGTCTGGATCCC[T/C]TCCTTCTTCATGGTCAGTGGCCTGTTAACCTAGAGGCAACCACCAGTTTTCAGAGGGCCA	37.5	3	128200132	GATA2	EXON
rs375299609	TCAACCTCATCTTCCCTTGAGCAGCCAAACGCAGGGAGCAGCAGTCCTGCCTGCAAAGCC[T/C]CTTCTGGACTTGAGGCAAACCCAGGTAAGCTCTTAAGAGGGGATAAGAGAGGGCTGTGAC	37.5	3	20161191	KAT2B	EXON
rs191758336	TTGCCTTCGTCTGTCCCGTCCCCTCCTTTTCTCTACATAAAGTTGTCCTTGTTGTTCTCC[A/C]AACAACTGTCCATGCAGGAAACCCCACCTGGGCAGCGGTCAGGTGCGGAGGCAGCCTCTC	37.5	3	128199625	GATA2	EXON
rs375961118	CTCCTTGTTTCCCTTTTTCCTTTCAAGTAAAGAGCCCAGAGACCCTGACCAGCTTTACAG[T/C]ACGCTCAAGAGCATCCTCCAGCAGGTGAAGGTGGGTGTCCTCTTTATTCACCTCATGCAA	37.5	3	20189768	KAT2B	EXON
rs147199030	GCTACTGGATTAAATATTACAACAACTATGTGGCAAATGAAGCATTTTAC[T/C]TTGCACATGCAGTCTCTGGAGATACACGAGGAGACTGTTCATAGGACTAC	37.5	6	153332400	RGS17	EXON
rs142834901	AATAAACTCTGACTAACATTGAGCTTATCTCTGCAGCTTGACTTCTGGTATCCAGGTGCC[A/G]CCCACCACGTAGCTGCTAATATGATGGTGGATTTCCGAGTTAGTGAGAAGGAATCCCAAG	37.5	3	148586726	CPA3	EXON
rs200533572	GGAGACAAGCGAGCAGCTCACCTTTGAGATCCCCCTGAATGATTCAGGTTCTGCTGGCCT[T/C]GGGGTGAGCTTAAAAGGGAACAAATCCAGAGAAACTGGAACAGACTTGGGGATTTTTATC	37.5	2	206023538	PARD3B	EXON
rs189817290	TTTGGACTCAGAAACAGCCACAGAAGTATTTCTCAGCACTCCCAGTTCCTGCCAACTTAG[C/G]TGGAAACGATGCCACAGCGAGACCAGAAAGAGGAGTCGCCTTAAGGTATCCCTACAAAGT	37.5	2	206484301	PARD3B	EXON
rs199968652	AAGCCCTCCGCTCCAGCCCCTCCGCCCAGTCTGAGGGCTCCTCAGCAGAGAGAGAACCTC[A/C]GAGAGTTGATGTTCATCTTGGTCACGCCAATAAGCTTGAGTGGTGTGGAGAGGCTGAAGG	37.5	8	11281901	FAM167A/C8orf12	EXON
rs6507666	CTGTTACGTAACACATTTTACACATTTTCCGCATTCCACGCCCCGCCCTTCAACAACAAC[A/C]ACCACAAACTCCGACCGTCCTTTCCAGGCCCTTTCCCTCTATAAACCTGCCGTTTTCTGT	37.5	18	21032796	RIOK3	EXON
rs188153352	GGTAAAATGCAGTATTAGTCCCGGGAGGATGTGCACAGCTGGTCAGAGCTTCCAGAAGGA[A/G]TATCTTCCGAGGACTAAGGTGATCAGGTTAAGAGGGTTCAACATCCCACGGCCCTCACCT	37.5	2	206481277	PARD3B	EXON
rs184413299	TGCTGGCCTCGGGGTGAGCTTAAAAGGGAACAAATCCAGAGAAACTGGAACAGACTTGGG[A/G]ATTTTTATCAAATCCATCATTCATGGAGGCGCTGCTTTTAAGGTGGGTAGGAATGACATT	37.5	2	206023589	PARD3B	EXON
rs372582050	TATGGAAACACTTAGGCGGTCAATGTCCATGGAGGGAAACATCCGAGGGATGATCCAGTT[A/G]GTGATTCTGAGGAGGCCAGAGAGACCAATGGAGGTGATGCAAATCTTGATTCTCCTCAGC	37.5	2	206037072	PARD3B	EXON
rs373525362	ATGTTCTGGAGGAGGCCAAGAAACCCCGAGTTATGGGGGATATTCCGATGGAATTAATCA[A/G]CGAGGTTATGTCTACCATCACGGACCCTGCAGCAATGCTTGGACCAGAGGTCAGCAGGGT	37.5	3	20164247	KAT2B	EXON
rs190401974	GTGTGCTTTGAGTCACAGATCCTGGTTGAACTCCAGCATGTTACAAACCTCAGCCCTGTT[T/C]TATGAAAGGTCATAACTACGAGGATTATTGTAAAACATTAATTTAGAAATGTAAAGTGGT	37.5	11	62440898	C11orf83	EXON
rs370290799	CTGATTGCTGTGTTTGAAGAACAAGAACCACTCCACAAGATTGAGAGCCCCAGTGGAAAC[C/G]CTGCAGATCGGCAGAGCCCAGATGCTTTTGAGACAGAAGTGGCCGCCCAACTGGCCGCAT	37.5	2	205829935	PARD3B	EXON
rs200496137	CATCAACTTCAGATCTGTGACACCGGCCAGGCAGCCTGAATCAATTAATTTGAAAGCCTC[A/G]AAGAGCATGGACCTTGGTAAGCAAGGGTGAGGTGACATCCAGGTCAGCTCTCCAGCCTCA	37.5	2	206058028	PARD3B	EXON
rs371258262	GTGTGAATCTGATTATTTGTCTATATCCTGTAGTGGCCGTCCTACGGGTGGAAGCACTGA[A/C]CGTATCCAGAAGTTGCGGAAAGAGTATTATCAGGCTCGGAGGGAAGGTTTCCCTTTATAT	37.5	2	206364647	PARD3B	EXON
rs191386794	TTAAGGTCCGCAAGGCGGGCCAGGGCCGAGACGCGAGTCGGATGTGGTGAACTGAAAGAA[T/C]CAATAAAATCATGTTCCTCCACCCAGAATGAGCCCTGCAGTCGACACCTACCAATGCTTA	37.5	11	62439824	C11orf83	EXON
rs12548860	CAGAGCATGGCAGACAGTAGATCTTGGCTGCGTTGTTCTGCCTACTTTGAAGGAGGCATA[C/G]AACTTCTGGCTCTTTGAAATTTTAAAAAAGAGACCAAGTTCTTTTCTGTCTACTAGAGAT	37.5	8	11280115	FAM167A/C8orf12	EXON
rs374557018	AAATAGTAAAATATTAAAAATGACGATAATAAAAGATGACTTAGAGCTTACCCTGAATCA[T/C]AGAAACAGTTCCACAGCCCTTGGCCACGACTCCAGAGTAAGCGATTAAAAACCCGGTTGA	37.5	1	84356013	TTLL7/MIR548AP	EXON
rs369314488	CAAAGTGCCGCCTCCTGTCCATGGAAAATCGGGACTAAAGACAGCAAATCTCACAGGAAC[T/C]GATAGTCCTGAAACAGATGCATCAGCTTCCCTGCAACAAAACAAGAGTCCCCGAGTACCA	37.5	2	205986516	PARD3B	EXON
rs114529475	TCCCTTTGGCATTAAACTCTGAAACCTACAATCAATGGCCTTCAAATTGGTGTTAAATTG[A/G]GAGAACACCCTACTGCTTTCTGAGTCTACGAGCAACAGAAAGACTGGTCTTAGTGCAATT	37.5	2	206484168	PARD3B	EXON
rs146314212	GAGATTGAAGGCCTTACTTTTATTTTATTCTAGGAGATTCTATGCTACAGAAGTACAAGG[T/G]GAAGAATGCATACCGATTACATTGGCAAGGGAGAGAAGAGCCTGGTGCTAGCACTTTTGC	37.5	8	11295972	FAM167A/C8orf12	EXON
rs200257970	TAGGCGCTGGCAACACTGGAGCTGCAAAGGAGTCACCACCTCCGGGCTTTTATTGAATAT[A/G]CTCTCCCAAGAGGATCTGTTGGCATGGAAACAGACATGATCTCATGTTGGCTGTTAAAAA	37.5	1	84348804	TTLL7/MIR548AP	EXON
rs191125021	ATGGAAACTAAAACCTCTAAAACATACAAGCTGGCCCAAATGAGAACACAAGCAAAAGAT[T/G]TGGAAGACAGCAAAACCTGAGCACTGGTTTGAACCAGGCACTGACATTTGAAATGCTTTA	37.5	2	206481978	PARD3B	EXON
rs145622725	CTAACACCTTCTTCTCCTTTTGCCGGGGCAGTTATCAATCCACCTCCTGTGGCTGGGACA[A/G]TTTCATACAATTCAACCTCATCTTCCCTTGAGCAGCCAAACGCAGGGAGCAGCAGTCCTG	37.5	3	20161119	KAT2B	EXON
rs114801020	CTCCCTCTGTTTTTTAGCAGACACTCATTTGTGCTCTTGTTTTTTTCTGCCCCAGTGATA[A/T]GACAAGAACAGTGGAGATTTCTGGGGAAGGAGGCCCATTGGGAATACATGTAGTGCCCTT	37.5	2	205978220	PARD3B	EXON
rs373504735	GTCCGTGTGGTATGCATGTCCTACAAAGTAATTAGTGTTGTTGGATTTGTTTGTAGCTGA[T/C]TGCTGTGTTTGAAGAACAAGAACCACTCCACAAGATTGAGAGCCCCAGTGGAAACCCTGC	37.5	2	205829879	PARD3B	EXON
rs74875888	CAATTTATTTATGGCCTTGGGAAAACTCAATCCGGTGTCTCCTTGTAGCTCAGAACACTA[A/G]TAGCCCCCCTGGAAGAGAGTGGCACATTGAGCTCCAAACCCAATCAACATACATCCACTT	37.5	2	206483259	PARD3B	EXON
rs10197347	TCAGGCTCGGAGGGAAGGTTTCCCTTTATATGAAGACGACGAAGGAAGAGCAAGGCCATC[T/C]GAGTATGACCTACTCTGGGTAAGCGCATGCATGATTTCAATCGTTGAATTCATCTTTTCT	37.5	2	206364737	PARD3B	EXON
rs140612684	CTGAATCACAGAAACAGTTCCACAGCCCTTGGCCACGACTCCAGAGTAAGCGATTAAAAA[T/C]CCGGTTGAAAATCCGATATAAATTTACTTCTTCAACATCAGGCACCTTCCAGATGCGTGG	37.5	1	84356065	TTLL7/MIR548AP	EXON
rs377664241	ATGCCTTACCTCCAGAAGCCATGGCTTTAGTTTTCTATCCAACAAAATATCAAATCCCAG[A/G]ACTTCAAAGCAGACACTTTCGCTTCCTGGAGGTTGACCAGGTCTACACATTCGATAGGCA	37.5	1	84399342	TTLL7	EXON
rs371928349	TACCAGAGACTCTTCCATACATGGTCCCGGTCCCATTTTTGTAAAAAACATTTTACCAAA[A/G]GGAGCAGCAATAAAAGATGGCCGCCTACAATCAGGGGACAGAATTTTGGAGGTAAGAATT	37.5	2	205989139	PARD3B	EXON
rs369015930	TTCAGCAGTATATTTTCCAGATCAGCACATCAACTTCAGATCTGTGACACCGGCCAGGCA[A/G]CCTGAATCAATTAATTTGAAAGCCTCGAAGAGCATGGACCTTGGTAAGCAAGGGTGAGGT	37.5	2	206058001	PARD3B	EXON
rs148423683	ATGACATATTTTCTCTCCTTCTGATCTGTATATTCTGAATCATTTCTTTATGTATAGAAT[A/G]CAGAGAGCTGGAATTCCTTGTCCAACAGTTGTACTACTGAAGAAACACATTTTAGTTATG	37.5	18	21054915	RIOK3	EXON
rs374973808	ATTACACCACACTGCCCCATTAGAAGAGGGGTGACCTTTTGCCCTTTCTTTTCCAGAATC[T/C]CCAAGCAAAGATTTTGGTCCAACTCTGGGTTTGAAAAAGTCCAGCTCCTTGGAGAGTCTG	37.5	2	206165258	PARD3B	EXON
rs61747091	TAACTTTCCTTTCTCTCCAGGCCAAAGTTGCAAAGATTGGCACTGATGTTCTATCAACTC[A/G]ATATGAAACCCGCTACATCTATGGCCCAATAGAATCAACAATTTGTAAGTCATTCCTCTT	37.5	3	148603920	CPA3	EXON
rs148725281	CTTTGTGCAGTACAAATTTAGTCACCTGCCAGCAAAAGAAAGGCAAACAATAGTTGAGTT[A/G]GCAAAAATGTTCCTAAACCGCATCAACTATTGGCATCTGGAGGCACCATCTCAACGAAGA	37.5	3	20142850	KAT2B	EXON
rs7012641	GAAGTCTGCCAGCAAGATAGATGGCCTGGAGTCCAGAACAGACTGGATTAGTGAAAGCTA[T/C]TGCAGTGCTTTGGACACTTACTATGGTAGGTGGGAGATATTTAGTATTTTTTAATTCACA	37.5	8	11225936	C8orf12/TDH	EXON
rs138349688	ATTAAAAACCAGCAGCTCTTCACTATGTTCCATATTTTAACCAAACTACT[A/G]TAGACTACTAAACATAGCCAAGCCAGAACATTCCTTCTGGATTAAGCCTA	37.5	2	206482610	PARD3B	EXON
rs150884035	AGACTTACAGCGAGTCTTTACCAATTGCAAAGAGTACAACCCCCCTGAGAGTGAATACTA[T/C]AAATGTGCCAATATCCTGGAGAAATTCTTCTTCAGTAAAATTAAGGAAGCTGGATTAATT	37.5	3	20193948	KAT2B	EXON
rs142121515	TTCTCAGCACTCCCAGTTCCTGCCAACTTAGCTGGAAACGATGCCACAGC[A/G]AGACCAGAAAGAGGAGTCGCCTTAAGGTATCCCTACAAAGTCACCTTTCT	37.5	2	206484320	PARD3B	EXON
rs143494181	CTTCCCTCTTCACAGTTGATGCGGCAGTTATATCATGAATGTACGCTTGTCCATGCTGAC[C/G]TCAGTGAGTATAACATGCTGTGGCATGCTGGAAAGGTGAGGAGCACATTTTGTTAACATT	37.5	18	21057015	RIOK3	EXON
rs151294142	CTGTGTGTGCTATAACAGGGACAAGCTAAAAGGACAAGCATTTTTCTCTC[-/CTTTT]ATTTTTATATGGATATCTTCTTTTGAAGTATTTTTATTTCACTTTTTCTA	37.5	8	11278984	FAM167A/C8orf12	EXON
rs370838199	AAAAATCGTTCCAAGAACCAAAACTCCAAATGCATCGGCACTGACCTCAACAGGAATTTT[A/G]ATGCTTCATGGAACTGTGAGTAGCAGACTTGCTATCAAGGAAAATTGCTATAAGGAATAT	37.5	3	148600367	CPA3	EXON
rs139441767	ATTTCTCTTTTCCCTGGTATGCACAAATATCAAGCCTATAAAAAAGTAAT[T/C]ATTTCCCCAAACCTGTAACCACTGCATTCGTTTTCTTTGGAGGAACATTG	37.5	2	206483997	PARD3B	EXON
rs140972380	TATTAAGGTAAATTTTCTATGGCATGTCCATTAGCTATTTCATGATAGAT[A/G]ATTAGGGGTTTCCTCAAAACCTGTGTGTGAGGAAATTGCACACAGTAGCA	37.5	3	20194295	KAT2B	EXON
rs150247543	ACGTTTGCTGCCTTTGTTCTCAGTTTCATCCCGTTCAAAATGCTCATTATGCTTGTTCAC[A/G]GAGTAGTTTGTCAGATGCATGTATAACTGGGTCTGTAACAAGTAAGAACCAAAGTTGTTA	37.5	1	84403667	TTLL7	EXON
rs199978711	CATCATTACTGTGAGGCAGATGCCTCATGTAGGAGGAAGCACGGTTTAAGGAATGTGACC[A/G]AGATGCAGAAGTTGGCCGTGACACAGATATCATTTGTTGAGCAGAAAATGGGCGGGTGTC	37.5	1	84373222	TTLL7/MIR548AP	EXON
rs377143619	CCCAATGACGGATGGGCCGAGAGTGAAGTTCCACCTTCTCCAACACCACATTCTGCTCTG[C/G]GATTGGGCCTCGAAGATTACAGCCACAGGTATTGATAAAATGATGTATCGTAAATGCTCC	37.5	2	206050559	PARD3B	EXON
rs2289023	TTGTGGAGGAAGCACGTGGAGGAGCACACTTGGAGATTTCATTGCCTGGCGGAAGACATC[T/C]TGAGCCCTGGAAAGAAAGTTGATAAATGTATGATGACCCTGCTTTGAGGTGCAGCATCTT	37.5	2	205986321	PARD3B	EXON
rs181351516	AAAGATTAATAATGCTTTCTGGAGAGTTTGATGCAAAAGTGGGGGAAACGGAGAAAAGGC[A/G]CTAAGGCTAAATCCATCTGCATTTGCTATATTTCATTAGCTAAAGTCAGGTCAGGGCAGG	37.5	2	206481753	PARD3B	EXON
rs150581232	GCCTTTCTCAATTATGTTTCCAGACTGTGGCCGTGATTCTAAAGGAAAATGTGTGCTCTT[T/C]AGTGGGTAGAACAAATGGAAATTTGGTTTCAGAATGGCTGACAGAAATCGACATAAGTCA	37.5	18	21061747	RIOK3	EXON
rs374150898	TGATCTTGTGTAAACACTTACGTCATTCAATCTGGCAGAACCGCATGTGGAGAAAAAATC[A/G]TTCCAAGAACCAAAACTCCAAATGCATCGGCACTGACCTCAACAGGAATTTTAATGCTTC	37.5	3	148600314	CPA3	EXON
rs377575057	AGTGTTGTTGGATTTGTTTGTAGCTGATTGCTGTGTTTGAAGAACAAGAACCACTCCACA[A/G]GATTGAGAGCCCCAGTGGAAACCCTGCAGATCGGCAGAGCCCAGATGCTTTTGAGACAGA	37.5	2	205829912	PARD3B	EXON
rs182711751	GGCAGTGTGCGGGTTTGGCAAAGCATCACGACCATCTTTGGGGTTCAAGTTCATTGACAT[A/G]TGATCTACTAGGCATTATCAATAATGGTTTCACACATCAATATTCTATAGCCTAAACAGC	37.5	8	11280517	FAM167A/C8orf12	EXON
rs12611542	ATTAAACTCTGAAACCTACAATCAATGGCCTTCAAATTGGTGTTAAATTGGGAGAACACC[T/C]TACTGCTTTCTGAGTCTACGAGCAACAGAAAGACTGGTCTTAGTGCAATTAGGCAGGAGG	37.5	2	206484178	PARD3B	EXON
rs34351144	ACATGTGGTGAGCCAGGAGGCTGGGACGGAGGTTAGGCCAATGTTGCTGCTGACTCATAG[-/A]ACCCACAGAGAGCAGGGACTTCACAAAGCTGAATTAATGTGGTTAGTTGTGTTCACTGTG	37.5	8	11279385	FAM167A/C8orf12	EXON
rs180674401	ACCCAATGGTTTCGGTTACTGTAATGACTGATTTCCAAAAAGAAAGAAAAACCTAATTTG[T/G]CATTTTTTCAGAATATGGGATGGGCTTTCCTGCATGGGTTCAAGGATGTTTATGGCATGT	37.5	8	11279796	FAM167A/C8orf12	EXON
rs374936332	ACCACCTCTAGGCGAAATGATAATAGTATCCTGCATCCACTTGGCACTTGCAGTCCACAA[A/G]ACAAACAGAAAGGTAAGAGTCTATTCATTTTATCCACTGCAAATGGAGTGAGAAAACACA	37.5	2	206041289	PARD3B	EXON
rs373285078	GGGGAACAGTTTGTGCAACAGAACCCTAAGAGGAAATCAGCTGCTCATCAAGATAAGGGC[T/C]GAGGCATAAAACTGCCAGAGGGTCTCAAGGCAGGCAAAGAAGAACCATGAGGCTCATCCT	37.5	3	148583048	CPA3	EXON
rs186388849	CATCCCGTTCAAAATGCTCATTATGCTTGTTCACGGAGTAGTTTGTCAGATGCATGTATA[A/G]CTGGGTCTGTAACAAGTAAGAACCAAAGTTGTTACCACCTATGACATCCTAGAACTGCGA	37.5	1	84403693	TTLL7	EXON
rs187327043	ATAATTTTTAAAACTTGGGTAACACTTCCAAATATGGGAGGAAAGGACAGATGTGTTTAC[A/G]AGGGAGGATTTTACAACATACTTGCTTTATTCACCTCCCTGTTTTGTGTTGCGTCTTTCC	37.5	18	21061600	RIOK3	EXON
rs141391874	GAACCGCATGTGGAGAAAAAATCGTTCCAAGAACCAAAACTCCAAATGCATCGGCACTGA[C/G]CTCAACAGGAATTTTAATGCTTCATGGAACTGTGAGTAGCAGACTTGCTATCAAGGAAAA	37.5	3	148600351	CPA3	EXON
rs138751736	ACAAGAAGAGATTGAGAAACAGTTTGATGTTAAAGAAGATATCCCAGGCAGGCACAGCTA[T/C]GCAAAATACAATAATTGGGAAAAGGTACAGTAAAAAATGCCTGTACTTTTTTTTAAGTTA	37.5	3	148596306	CPA3	EXON
rs141324442	ACACATTTGCCTTTGAGCTCCGAGATAAAGGCAAATTTGGTTTTCTCCTTCCAGAATCCC[A/G]GATAAAGCCAACGTGCAGAGAGACCATGCTAGCTGTCAAATTTATTGCCAAGTATATCCT	37.5	3	148614418	CPA3	EXON
rs199619560	TATACAAAAATAGCAGCACAGTTACCTATAATTCCCCATATGTCGATTTTCATGTTCTTC[T/C]CGTGAGATCTGCTTTCGTACTTGAGCGAGTCTCTCTTTCTGGAAATGAGAAAAATTTTAC	37.5	1	84386805	TTLL7	EXON
rs369240164	TTATGTATAACCAATGGCGATCTTCCCTTCTGTTTCACAGATGGCCATATCTGGATGTAA[A/G]CAAAACATTGGAGCGAGTCATTCCAGGTGAATTGTACTTCAAGTTGTAGGTTGGTGTTCT	37.5	1	84335671	TTLL7/MIR548AP	EXON
rs370750384	GTGACAAATATATTAAAGATGATTTCAGGTTTAAAGATCGCTTCAGTAAACTAAATCCAC[A/G]TAAGATCATCCGCATGTGGGCAGAAAAAGAAATGCACAATCTCGCAAGGTAAAGAAAATA	37.5	18	21053542	RIOK3	EXON
rs139893641	ATTTCCTAATGTGTGCCTTCCCTCTTCACAGTTGATGCGGCAGTTATATCATGAATGTAC[A/G]CTTGTCCATGCTGACCTCAGTGAGTATAACATGCTGTGGCATGCTGGAAAGGTGAGGAGC	37.5	18	21056999	RIOK3	EXON
rs181341779	GTTTTCTGACATATTCTGACAAAGAGCAGCAAACCACTGCTGTGTGGCATTCTTGGAGTG[T/C]GCTGTGAATGTGCTTTTTAAGAAATTAAAAAGAGATCATTTTAAAATTGGTTCTTTGTGT	37.5	18	21063055	RIOK3	EXON
rs112604977	TCAAAGATGATGTACACTGTGTGAATCTGATTATTTGTCTATATCCTGTAGTGGCCGTCC[A/T]ACGGGTGGAAGCACTGACCGTATCCAGAAGTTGCGGAAAGAGTATTATCAGGCTCGGAGG	37.5	2	206364629	PARD3B	EXON
rs190525855	GGGTGGGGGCTGAGGTGGAGAGTAGAGGGGTTGGCAGTGTGCGGGTTTGGCAAAGCATCA[A/C]GACCATCTTTGGGGTTCAAGTTCATTGACATGTGATCTACTAGGCATTATCAATAATGGT	37.5	8	11280485	FAM167A/C8orf12	EXON
rs371854337	GCAATTGGATCAGTGTATGATATGGATGATGATGAAATGGACCCCAATTA[T/C]CCAGAGTGAACCACTTTCGGGAACCATGCACATCAGCAAATGTCTTTAGA	37.5	2	206305211	PARD3B	EXON
rs199998087	AAAGTGCCGCCTCCTGTCCATGGAAAATCGGGACTAAAGACAGCAAATCTCACAGGAACC[A/G]ATAGTCCTGAAACAGATGCATCAGCTTCCCTGCAACAAAACAAGAGTCCCCGAGTACCAA	37.5	2	205986517	PARD3B	EXON
rs374578188	CTGATTTACAAGCCGGTCTGATCCTTGTCTCTTTTATTTCTTCTCCTCAGTGCCAGATGA[A/G]AGCAAGGTTCACTCATTGGCTGGACAAAAATCGGGTAAGAAATTCCTTGTAACTGACTAT	37.5	2	206110512	PARD3B	EXON
rs115902904	ATTCCCGGCAGAAGAACCCCATGACTGCAGCCGTATAGCTGAGTGCCACCGAGGCCAGCC[T/C]GGTCCAGAAAGGAAGGTGTCTACTCTACCTTTGCCCTTTCTAAACCTGAAGACCTCCTTG	37.5	2	206480560	PARD3B	EXON
rs189141225	AGTCATTTTCACTTACAGTGCTTTATCTCTTGCAGGAAAAAGCAGTTGATCCTAAGACAC[A/G]TTTACTTATGTATAAAATGGTCAACTCTGGAATGTTGGAGACAATCACTGGCTGTATTAG	37.5	18	21047388	RIOK3	EXON
rs372961643	AAAAATAAAACAATTAACTCATCAGCGAGTTAAGCCTATGCATTTTTTTA[A/G]ATTTTTTCTTTTGTCTCAGAGTAGGAGGCGAGGGGGTTGAAGGGTTAGCA	37.5	3	128199010	GATA2	EXON
rs138656309	GCTGATCCTCAAGCCTGTTGGGAGGGAGAAACTCTTAAAATCAAATCCTA[T/C]GCACTGTAGTTGACCTACACAAGTGGCTTCCGCATTTGGACAAAAATCAG	37.5	8	11280820	FAM167A/C8orf12	EXON
rs188923583	GGTCATTAAACTTGTGTTTGTTCTACTATAGGGTCCTGGTTACTGGGTGAAGATTCATCA[T/C]TTAGAATATACAGATGGAGGAATCCTGGATCCAGATGATGTCTTGGCAGATGTTGTTGAA	37.5	2	205550933	PARD3B	EXON
rs201978848	TGACCATAGAGCCTCCTTTGAGCCTCAGCTTTTTGTTTGGCCAAGTTTCT[T/C]TTTTGTCACTGGTCCTAAAATATAAAACATAAGACCATATTCTAGAACTC	37.5	1	84387062	TTLL7	EXON
rs10792356	ACAATGCTTTCTGTGGCCATTATTTAACCTCTGGTTAAACAAGCTTAGGAGGCTGACTTA[C/G]TAGTAGTAAAAGGAGTGTGCTTTGAGTCACAGATCCTGGTTGAACTCCAGCATGTTACAA	37.5	11	62440823	C11orf83	EXON
rs371334162	ACCTCCTGTGGCTGGGACAATTTCATACAATTCAACCTCATCTTCCCTTGAGCAGCCAAA[T/C]GCAGGGAGCAGCAGTCCTGCCTGCAAAGCCTCTTCTGGACTTGAGGCAAACCCAGGTAAG	37.5	3	20161160	KAT2B	EXON
rs192810274	GGGGCATTTTCCAAGCCATGCTTTGAGAACTGTCAAAATGCTGTAACCACCTCTAGGCGA[A/G]ATGATAATAGTATCCTGCATCCACTTGGCACTTGCAGTCCACAAGACAAACAGAAAGGTA	37.5	2	206041244	PARD3B	EXON
rs377005273	CTCTCCAGGCCAAAGTTGCAAAGATTGGCACTGATGTTCTATCAACTCGATATGAAACCC[A/G]CTACATCTATGGCCCAATAGAATCAACAATTTGTAAGTCATTCCTCTTATTTACTGAGCC	37.5	3	148603932	CPA3	EXON
rs113659163	TTGAGCTCCAAACCCAATCAACATACATCCACTTGGCTGCAGATCTGACTGCTGGGTCAT[C/G]AAGGCCGTGAAATGATGTTTGCCCTCAAGTCACTAGATATTTTAAGAAGCCCTATTTTTC	37.5	2	206483346	PARD3B	EXON
rs199784704	TGAAATTTTCTCCTGCTGAACAGCAGAATCACACCATATAAGATTACTTGTTTCATCCTC[A/T]TCTGGAGTTTTCATAAATCCCATTTCATCTATTACTAAACGAACTGCAAGTAAACAGTTA	37.5	1	84415626	TTLL7	EXON
rs367786973	TTGGAAGAGCGCAGGGGTGTAATTGAATTTCACGTGGTTGGCAATTCCCTCAACCAGAAA[T/C]CAAACAAGAAGATCCTGATGTGGCTGGTTGGCCTACAGAACGTTTTCTCCCACCAGCTGC	37.5	3	20167502	KAT2B	EXON
rs372313045	CATTTTTTCAATCTATACAAAAATAGCAGCACAGTTACCTATAATTCCCCATATGTCGAT[T/C]TTCATGTTCTTCTCGTGAGATCTGCTTTCGTACTTGAGCGAGTCTCTCTTTCTGGAAATG	37.5	1	84386792	TTLL7	EXON
rs148960024	CAAAAGCACTTCTCATTCAGTGTTTCACTTTGTTGACGTATAGGAGAGACAGGCTGGAAA[A/C]CGAGTGGAAAAGAGAAAAGGTAAGTATGACGGGCAAGAGGATGTTAATGGAAGTGATTTT	37.5	3	20189472	KAT2B	EXON
rs2272208	CCGCTGGATCTAAACTAGATTAGACTAGTGGATTGTAAATAAATAAACAAACTAGGCTCT[T/C]TCTGTTCATTCATTATTTCCTGGAGCAGTTCTAAACTGGGATGACTTGGGAGACAGAAAA	37.5	18	21032909	RIOK3	EXON
rs368723042	TAGGTCATTAAACTTGTGTTTGTTCTACTATAGGGTCCTGGTTACTGGGTGAAGATTCAT[C/G]ACTTAGAATATACAGATGGAGGAATCCTGGATCCAGATGATGTCTTGGCAGATGTTGTTG	37.5	2	205550931	PARD3B	EXON
rs202247606	ATATATCTGAAGTTGGGCATCTTCATACATGTGAGGATTGGGATCCAACAGATTTCTATT[A/G]ATCACCTCTCTAACTCGAGAATCAAGACTGACCTAAAAAGAAACAAGAGCAAATACATTA	37.5	6	153332865	RGS17	EXON
rs56193845	CCAGAGACACTGGCTGCCAGCCACTGGGGCTGCGTCCCCAAGTGCCCATTTGTCATGCCT[T/G]TCGATTTTCCCTTCCTAGTAGCTCCCTGTCAATGTTGCTGAGTCATGTACTTAGGGTGAA	37.5	8	11281348	FAM167A/C8orf12	EXON
rs78356818	CTTAATTTTTTTTCACCTCCGACAGGCAACCAAAACTTATGGGAGAAACAAAATTATGAC[C/G]AAACTCTTGGACCGAATGAATTTTTACATTCTTCCTGTGTTCAATGTTGATGGATATATT	37.5	3	148599344	CPA3	EXON
rs199916721	GTGTCTAGATTTCTGTCCATGCTAGAAGAAGAAGTATATAGTCAAAACTCTCCCATCTGG[C/G]ATCAGGATTTTCTCTCAGCCTCTTCCAGAACCAGCCAGCTAGGCATCCAAACAGGTAAGT	37.5	3	20156426	KAT2B	EXON
rs374091532	GCCTGTGCTGATTAGCAAGCAGTGTGTGCTGCTGTACCAAGCTCTCAGGA[A/G]TCTGGAAATTCCACATTAGTCTAAGTAGGATATGGCCCCAAATCACTGAA	37.5	1	84417949	TTLL7	EXON
rs3749185	ACATAGAAAAGTGAGACATCTGCCATTCCCAACTCTGGGAAAACCAACTAATATACAACC[A/G]TATAAATGAAGGCCATCTTGATGGTCTCAACACTAATTTTTATGATGCAAATTTATACAC	37.5	3	20195223	KAT2B	EXON
rs189482952	AAAATAGCTCAGACATTTAACTTATCCCCAAACATGTGTCTTGATCTTAGTTTCCACCCA[A/G]AGAATGAAGAAAGCAAGCAAGCACTGGGTTACCCAAGCAACTAAATCACTCAGTTGCATC	37.5	8	11279625	FAM167A/C8orf12	EXON
rs376722929	GTAAGCAAATAAACTCTGACTAACATTGAGCTTATCTCTGCAGCTTGACTTCTGGTATCC[A/T]GGTGCCACCCACCACGTAGCTGCTAATATGATGGTGGATTTCCGAGTTAGTGAGAAGGAA	37.5	3	148586719	CPA3	EXON
rs377189435	TTGTGCTCTTGTTTTTTTCTGCCCCAGTGATATGACAAGAACAGTGGAGATTTCTGGGGA[A/C]GGAGGCCCATTGGGAATACATGTAGTGCCCTTCTTTTCATCTCTGAGTGGAAGGTAAGAT	37.5	2	205978248	PARD3B	EXON
rs373298908	CGATATCAGGTTCTTCTTTAGACTGGGCTTATGACCTGGGCATCAAACACACATTTGCCT[T/C]TGAGCTCCGAGATAAAGGCAAATTTGGTTTTCTCCTTCCAGAATCCCGGATAAAGCCAAC	37.5	3	148614370	CPA3	EXON
rs184286437	CACTTTTTCTAACAGCAATATAGAAACAAATAATCATAAAAAATAAAAGTATAAATCGTC[C/G]ATTGATTATGTAATAGCACTTGGTATTGCTACAGGGTGTGGGTCTTGAACTCGGTCAGGC	37.5	8	11279088	FAM167A/C8orf12	EXON
rs148382472	CCATGAGGCTCATCCTGCCTGTGGGTTTGATTGCTACCACTCTTGCAATTGCTCCTGTCC[T/G]CTTTGACAGGTAAATCTTACTTCCTGTGTTCCAGTCTCTGTGTAGAAGAGAATTAAAGGT	37.5	3	148583153	CPA3	EXON
rs374539790	CTTGGTCATATTTCTTGCTAAGAAATCCTTCCTACAGATCTCCCCCATTC[T/C]GGAAAATGGTTGATCCTCTGGAAAATAAAAAGGTAAATATTAATATTCTC	37.5	1	84414360	TTLL7	EXON
rs3021518	TTACATTGGCAAGGGAGAGAAGAGCCTGGTGCTAGCACTTTTGCTTCTTTGGTCTTTCAA[A/T]AATGTCTTTCCCCTTGATTATACATGATATATTCCTATTTTGGAAACTTCGAAAACTATA	37.5	8	11296049	FAM167A/C8orf12	EXON
rs190219125	AAATCCGATATAAATTTACTTCTTCAACATCAGGCACCTTCCAGATGCGTGGAAGAACTG[A/T]ACGAATACTTGTTTTCACTATGTCCAAAACCTAGTGGAAAAACCAAAGTACTTACAATCT	37.5	1	84356134	TTLL7/MIR548AP	EXON
rs147538092	ATGGCACCAAGTAAAGATCTTAAGAGCATAGTAGGGGTTCTGAGACCGAC[T/C]GTCACCCGTGGATCCTGATGGGGAAGAACAGAGGCTTCACTGTAGCTATA	37.5	2	206483769	PARD3B	EXON
rs199942135	CGTGAAGCCCCAGGATGAAAAACAAGCAGACATCATAAAGGACTTGGCCAAAACCAATGA[A/G]GTAAGCATTTAGAGGGATATTTTATCTTTTCTTACTGTTCTCTAAAAGATGCTTCTTCTT	37.5	3	148583335	CPA3	EXON
rs139111589	TTTTTTTTTTTTTTGTTTTTTGCTTTTAGCATAGTAAACTCTCCTGTAAT[A/G]AAAATGCCACAGTTTTGGCAGTGAACAACCAGAGGAATCCCCATTAGGAT	37.5	6	153332070	RGS17	EXON
rs201795949	GAAATTGCCTTCCCTCTTTTTAAGGGTGTGAATAACTTTGTGCAGTACAAATTTAGTCAC[C/G]TGCCAGCAAAAGAAAGGCAAACAATAGTTGAGTTGGCAAAAATGTTCCTAAACCGCATCA	37.5	3	20142815	KAT2B	EXON
rs138650015	TCCTGGAACAAGCAAGACAGGAAAAAGATAAACTGCCTCTTGAAAAACGAACTCTAATCC[T/C]CACTCATTTCCCAAAGTAAGGGAGAGTTTTTGCTGGTCTTTGTTTGATCCCAGAGCTTGA	37.5	3	20153264	KAT2B	EXON
rs143435805	TCCAGGTGAATTGTACTTCAAGTTGTAGGTTGGTGTTCTCAAGAAGAATTGGGTGCTCCC[T/G]GGTAGTAAATACCTAAAAATGATGGTTAACAAATTAGATTTTTACAAGCAAATTATAACT	37.5	1	84335753	TTLL7/MIR548AP	EXON
rs186902232	TCCCCACCCCCAGCTTTCATACTAGGGCTGTGGGATCCCAGCTCTTTTCCAAAAAGAATT[A/G]CAAAGCTCCAACCTTGTGTGTAGGTTTTATTCCTTTCATAGCAGGGCTCCTGTGGCTACG	37.5	3	128198871	GATA2	EXON
rs183898760	ATTGATGTGAGTATGGTGTGAGACAGAACTTCAGGTTGACTTTTGGTTCTCTATGGATAC[C/G]CATTAGACCCAGTAGATATAGAACCATATTCATGGCACCAGTGACTGAAGAGTCCACGCA	37.5	8	11241406	C8orf12	EXON
rs143548388	AGCTCTGTGTAATTTTTTCCTGTCTCTTGCATCTCAGACCAATTTTCTGTCAGCACACTC[A/G]GCCAGGGATGAGGCGGCAAGGTTGGAAGAGCGCAGGGGTGTAATTGAATTTCACGTGGTT	37.5	3	20167420	KAT2B	EXON
rs143722899	TTATCCTTGGTCTTAGGAAGCCCACCTCAATGTTTTCCAGATTTTTACCTCTTTTGGTGA[T/C]AGTATAGAAATGTAATCTTCATATATCATCCTAGCCTTTTCTTCAATTACTTTTTTGTTC	37.5	6	153345409	RGS17	EXON
rs373104225	CACCAAGCAGGGGGAGACAGCATCGCTGGTCATTGCCCGCCAAGAAGGACATTTTCTGCC[T/C]CGAGAGTTGGTAATGTTCAGATCTCAGTCTCACTGAATTTTTAATGCCGAGCTTAATACA	37.5	2	205990452	PARD3B	EXON
rs371676606	CCTCCTTCTTGAGGCAGAGATGGCATTATTGCCTGTGCTGATTAGCAAGCAGTGTGTGCT[A/G]CTGTACCAAGCTCTCAGGAAATCTGGAAATTCCACATTAGTCTAAGTAGGATATGGCCCC	37.5	1	84417929	TTLL7	EXON
rs112648602	AGCAGTGATTGTCAGCTGCCAATAGCAAATGAAGTTATGGGTGACTTGAAATACCAAAAC[A/C]TGAGGAGTGGGCAATGGTGCTTCTGTGCTTTTCCCCCTTGTAACCCATGTGCCAGATGTG	37.5	18	21061334	RIOK3	EXON
rs149898287	AATCAACTAATTTGAGCTATCTGGCCTTACTCTTAGTAGTTTTTAGTACGTGCTGGACAC[C/G]ACTTTTAAAAAGCAATCACTGTGCTAGAAAAGTATATTGGCTTTGTTAGGATTAAAGTTC	37.5	18	21062573	RIOK3	EXON
rs145075496	TCAAGCCTATAAAAAAGTAATTATTTCCCCAAACCTGTAACCACTGCATT[T/C]GTTTTCTTTGGAGGAACATTGTAGCATTTCAGGAGGGTCGAGAGATCTAA	37.5	2	206484026	PARD3B	EXON
rs146308286	ATCCCATGATTGCTTCTAAGGAAACCTACCAATTTCAAACTTTGTCCCGGCAACATTTGC[T/C]GTAATGGTTCCCTTCTTTTTCTTCTTTCTGACTTTCCTTTTCATTGTGCTTTGATAAGGT	37.5	1	84417559	TTLL7	EXON
rs143922613	TCACCTGAATCCTTCTCTTGCTCATTTAAGTCCCATGTTACTGCTGTTTG[-/C]TTTTACTTACTTTCAGTAGCACCATAACGAAGTAGCTTTAAGTGAAACCT	37.5	3	148614640	CPA3	EXON
rs11659196	TTAACTTCAATGTAATCATGCCTCCTATTACTGAAGTCAGATTGGAACCACTAAAGATCC[A/T]AACTTTCTGTCTGGTAATAGAAAGTAAAAATCTAGACATCATTTACATTTGAGAAAGCTG	37.5	18	21062695	RIOK3	EXON
rs373163425	CTGACTACATTCAGCTAAATCTTTCCATTTTCGCTGAACCCAATGGTTTC[A/G]TTACTGTAATGACTGATTTCCAAAAAGAAAGAAAAACCTAATTTGGCATT	37.5	8	11279749	FAM167A/C8orf12	EXON
rs150773106	TTCCTTTTCATTGTGCTTTGATAAGGTAATTCTGTATTCAAATCCAGGGGAGAGGGTCCC[T/G]GAATAACTTTAAAAAAATGTAAAATAATCAGATAACACTGAAAACAAAAATCTATACCAG	37.5	1	84417653	TTLL7	EXON
rs193204666	CACGTTCAGAAGAATGGAAGGAAAGCTGCTTCATTTTTGAAAGATGATGGAGACCCACCA[C/G]TACTATATGATGAATAGCACTAATACCCACTGCTTCAGTGTTAACACAGCAGTGATTGTC	37.5	18	21061226	RIOK3	EXON
rs117716500	TGCGGGTTTGGCAAAGCATCACGACCATCTTTGGGGTTCAAGTTCATTGACATGTGATCT[A/T]CTAGGCATTATCAATAATGGTTTCACACATCAATATTCTATAGCCTAAACAGCTGTGCAA	37.5	8	11280524	FAM167A/C8orf12	EXON
rs184101488	GTTCTCAGTTTCATCCCGTTCAAAATGCTCATTATGCTTGTTCACGGAGTAGTTTGTCAG[A/G]TGCATGTATAACTGGGTCTGTAACAAGTAAGAACCAAAGTTGTTACCACCTATGACATCC	37.5	1	84403682	TTLL7	EXON
rs182541253	AGGGCAGTAAGGTGACACCACCAGAATCCACCAGGAGGCCCCGGTCACGCCCCTGCAGGA[T/G]AATTCAGTTATGGAAAATGCTTTCAGGACCTGCCTGGTTCAGTCACCAGTGGTCTCCCAG	37.5	8	11281053	FAM167A/C8orf12	EXON
rs148979967	ATGAATGAAAAGATAAGCTCTGTCTGGTATCACTTACCAAATTGGACTCATTAGGTGGAA[T/C]GTACTTCTCTGTACCCATTCGCACAAGCCCATCATGGTAGAGAAATATTTTTAGTGGATC	37.5	1	84408169	TTLL7	EXON
rs144841188	TGACCTCCCTAACCTGCTGGGGTCTTAACTTGCTGATCCTCAAGCCTGTT[A/G]GGAGGGAGAAACTCTTAAAATCAAATCCTACGCACTGTAGTTGACCTACA	37.5	8	11280789	FAM167A/C8orf12	EXON
rs150713488	TGTTTTGTGCTTTTTTCCTTCTTCCCTTTTTTTTTTTTTTTGTTTTTTGCTTTTAGCATA[C/G]TAAACTCTCCTGTAATGAAAATGCCACAGTTTTGGCAGTGAACAACCAGAGGAATCCCCA	37.5	6	153332053	RGS17	EXON
rs59459560	CTGGTGTCTCTGCTGTTCCCAGTCTGAGGAGCCTGGTAAGAGCCTTTTAATTGAATTTTG[A/T]CCATAGAGCCTCCTTTGAGCCTCAGCTTTTTGTTTGGCCAAGTTTCTTCTTTTGTCACTG	37.5	1	84387014	TTLL7	EXON
rs371949901	CAACTGGCCGCATTTAAGCCAATTGGTGGGGAGATTGAAGTAACCCCTTCTGCTCTAAAA[C/G]TAGGTATGTGTAATGTTTATGATATTCTTTTCACCTGACTGAAGATCCGTCATCTTGTTG	37.5	2	205830043	PARD3B	EXON
rs187798729	GAGGGAGAAACTCTTAAAATCAAATCCTACGCACTGTAGTTGACCTACACAAGTGGCTTC[T/C]GCATTTGGACAAAAATCAGTTACTAACAAGTGAACAACACATCAGTAACAGTCTTATTAA	37.5	8	11280851	FAM167A/C8orf12	EXON
rs200709570	TGGCATATAAATGCAAGAAACAATAGCTATGTGGTTCTCACACTCACCATTCCTCTAGGA[A/C]CTGGATACTCTCCATTTTTGTAGTGTGTGTGGGTCTTCCCGCATTTTCCCCTCTTTCTTC	37.5	6	153347602	RGS17	EXON
rs148489358	AGCAGGAGTGCCCTTCAAACACGCTGCTGAAGGGCAACTGGAGGTTCCGG[C/G]GAAATGTGAAGAAAGAAACGCAAACACCCCTAGGAACCAGGTTGGTCTTG	37.5	8	11291604	FAM167A/C8orf12	EXON
rs143299684	TTTTTCAGGATTGGAGCAAAACATCAGGAGCTAAGGGAAAAGCAGGCAAGAGGTCTTCTT[A/G]ATTATGCTACTGGTGCAATTGGATCAGTGTATGATATGGATGATGATGAAATGGACCCCA	37.5	2	206305146	PARD3B	EXON
rs375898348	TAAAACTTTGACATAATCTTATTCTTTCAGGAAACACAAAACCCTTGCTTTAATTAAAGA[T/C]GGCCGTGTTATTGGTGGTATCTGTTTCCGTATGTTCCCATCTCAAGGATTCACAGAGATT	37.5	3	20168945	KAT2B	EXON
rs373970088	TTTAACCTCTGGTTAAACAAGCTTAGGAGGCTGACTTACTAGTAGTAAAA[A/G]AGTGTGCTTTGAGTCACAGATCCTGGTTGAACTCCAGCATGTTACAAACC	37.5	11	62440835	C11orf83	EXON
rs376968297	AAATTAAAATACCTAAAACCAAATATGTTGGCTATATCAAGGATTATGAAGGAGCCACTT[T/C]AATGGGATGTGAGCTAAATCCACGGATCCCGTACACAGAATTTTCTGTCATCATTAAAAA	37.5	3	20181786	KAT2B	EXON
rs372033389	GGAAGAATGACCTTCCCTTTCACAGGCCCCGGCCGCACATGGTTCGAGGCCGAGGCTGCA[A/G]TGAGAGCTTTAGAGCAGCCATTGACAAATCCTACGATGGACCTGAAGAAATAGAAGCTGG	37.5	2	206165401	PARD3B	EXON
rs370080728	GAAGTTGCGGAAAGAGTATTATCAGGCTCGGAGGGAAGGTTTCCCTTTATATGAAGACGA[T/C]GAAGGAAGAGCAAGGCCATCTGAGTATGACCTACTCTGGGTAAGCGCATGCATGATTTCA	37.5	2	206364716	PARD3B	EXON
rs181770135	GCCGTATAGCTGAGTGCCACCGAGGCCAGCCCGGTCCAGAAAGGAAGGTGTCTACTCTAC[C/G]TTTGCCCTTTCTAAACCTGAAGACCTCCTTGGTGTTAGGAATTCTCCATGTTACTGATAA	37.5	2	206480589	PARD3B	EXON
rs12986808	CCCCTCCAAAGATTCATAAAATTCTTGAGCTAAAGTGATCTTCTGAAGAAAAGCCACCTA[A/C]CAATGTTAGGAGGCTCATAAAGCTCATTTCTCTTTTCCCTGGTATGCACAAATATCAAGC	37.5	2	206483921	PARD3B	EXON
rs145039073	GAAACAAAATTATGACCAAACTCTTGGACCGAATGAATTTTTACATTCTTCCTGTGTTCA[A/G]TGTTGATGGATATATTTGGTCATGGACAAAGGTACTGCTCTCTACTCTCTTGTTTGCATT	37.5	3	148599388	CPA3	EXON
rs199843431	TTATGCTGGCTCAGATGCTACAGATGGAATATGACAGAGAATATGATGCACAGCTTAGGC[A/G]TGAAGAAAAAAAATTCAATGGAGATAGCAAAGGTATTATAACCTTATTGTGACAACTTCA	37.5	18	21044044	RIOK3	EXON
rs374063108	CACTAATTTCATTAGAAGCCACCTGAATGAAATCAAGGTTTACATCACCTTCCATTCCTA[T/C]TCCCAGATGCTATTGTTTCCCTATGGATATACATCAAAACTGCCACCTAACCATGAGGAC	37.5	3	148601539	CPA3	EXON
rs376982085	TGTATACTAACTGAGTGTGCCCCTGACCATGGGTATTGATTATTTTTTCTCTGTACAGAC[A/G]GTCTGTCTGATAAGAGCTCTCACTCTGGCCAAGGAGCTCTGAATTGTGAGTCTGCCCCTC	37.5	2	206166190	PARD3B	EXON
rs142056121	CACCATAACGAAGTAGCTTTAAGTGAAACCTTTTAACTACCTTTCTTTGCTCCAAGTGAA[A/G]TTTGGACCCAGCAGAAAGCATTATTTTGAAAGGTGATATACAGTGGGGCACAGAAAACAA	37.5	3	148614720	CPA3	EXON
rs187659720	AAAACCTAATTTGGCATTTTTTCAGAATATGGGATGGGCTTTCCTGCATGGGTTCAAGGA[T/C]GTTTATGGCATGTTCTCTGTCGTGTGTGTGTGTGTGGGGGTGTGTGTGTGTGTGTGTGTG	37.5	8	11279843	FAM167A/C8orf12	EXON
rs111299083	AAAATCAGAAGGAAGACGAAAGATGGGGCTATAAAAACAAAACTACCTGATAGTTGAAAC[T/G]CTTTCAGAGTTGTTCAAATCAGTGAGAGTGGCAACGGAACACACAAACAACTAATTATGG	37.5	2	206480787	PARD3B	EXON
rs373833642	CAAAGAAATTAAAATACCTAAAACCAAATATGTTGGCTATATCAAGGATTATGAAGGAGC[A/C]ACTTTAATGGGATGTGAGCTAAATCCACGGATCCCGTACACAGAATTTTCTGTCATCATT	37.5	3	20181781	KAT2B	EXON
rs202116411	AAACTCTAATCATTGCTCCTTGTTTCCCTTTTTCCTTTCAAGTAAAGAGCCCAGAGACCC[T/C]GACCAGCTTTACAGCACGCTCAAGAGCATCCTCCAGCAGGTGAAGGTGGGTGTCCTCTTT	37.5	3	20189753	KAT2B	EXON
rs58962215	ACTGGTGTCTCTGCTGTTCCCAGTCTGAGGAGCCTGGTAAGAGCCTTTTAATTGAATTTT[T/G]ACCATAGAGCCTCCTTTGAGCCTCAGCTTTTTGTTTGGCCAAGTTTCTTCTTTTGTCACT	37.5	1	84387013	TTLL7	EXON
rs150822877	TCCAAGAACCAAAACTCCAAATGCATCGGCACTGACCTCAACAGGAATTTTAATGCTTCA[T/C]GGAACTGTGAGTAGCAGACTTGCTATCAAGGAAAATTGCTATAAGGAATATTTAGGTCCC	37.5	3	148600376	CPA3	EXON
rs140067731	AAAGTATATATCTGAAGTTGGGCATCTTCATACATGTGAGGATTGGGATCCAACAGATTT[C/G]TATTGATCACCTCTCTAACTCGAGAATCAAGACTGACCTAAAAAGAAACAAGAGCAAATA	37.5	6	153332860	RGS17	EXON
rs138266237	ATTGGTGGTATCTGTTTCCGTATGTTCCCATCTCAAGGATTCACAGAGATTGTCTTCTGT[A/G]CTGTAACCTCAAATGAGCAAGTCAAGGTAAGGGTAAACCCAAGGTCTTAGAAGAAGAGCA	37.5	3	20169015	KAT2B	EXON
rs144470644	TCCGAGAAAGAGACGAAAGCTGTCACTAATTTCATTAGAAGCCACCTGAATGAAATCAAG[A/G]TTTACATCACCTTCCATTCCTACTCCCAGATGCTATTGTTTCCCTATGGATATACATCAA	37.5	3	148601516	CPA3	EXON
rs370247620	TAAGCTCTGTCTGGTATCACTTACCAAATTGGACTCATTAGGTGGAATGTACTTCTCTGT[A/G]CCCATTCGCACAAGCCCATCATGGTAGAGAAATATTTTTAGTGGATCACACGATGTAACC	37.5	1	84408182	TTLL7	EXON
rs368676695	ATGCAAATGTAATTTTTACTTTTATCTCTTAGGATCCTGCAGAGTGTGGGGCATTTTCCA[A/G]GCCATGCTTTGAGAACTGTCAAAATGCTGTAACCACCTCTAGGCGAAATGATAATAGTAT	37.5	2	206041197	PARD3B	EXON
rs375035907	CAGTTCCACAGCCCTTGGCCACGACTCCAGAGTAAGCGATTAAAAACCCGGTTGAAAATC[T/C]GATATAAATTTACTTCTTCAACATCAGGCACCTTCCAGATGCGTGGAAGAACTGTACGAA	37.5	1	84356079	TTLL7/MIR548AP	EXON
rs151177562	GAAAGAGCAAAACAGATGACCTACCACTTGAGAGTTGGTAGAGCAGGCATCATTACTGTG[A/T]GGCAGATGCCTCATGTAGGAGGAAGCACGGTTTAAGGAATGTGACCGAGATGCAGAAGTT	37.5	1	84373175	TTLL7/MIR548AP	EXON
rs181273671	TGAATTAATGTGGTTAGTTGTGTTCACTGTGCAAAGTAAGGAAGCCAGTCAACACTGGAC[A/G]ATGTTTAGAAAACATCGCTGTCCCCCTCCACTTCTCATCTTGGGTCACCTCCTCATCCCA	37.5	8	11279475	FAM167A/C8orf12	EXON
rs146653585	CCTGAATGAAATCAAGGTTTACATCACCTTCCATTCCTACTCCCAGATGCTATTGTTTCC[T/C]TATGGATATACATCAAAACTGCCACCTAACCATGAGGACTTGGTACGTAGACAAAAGTTT	37.5	3	148601560	CPA3	EXON
rs144875299	AACCCCGAGTTATGGGGGATATTCCGATGGAATTAATCAACGAGGTTATGTCTACCATCA[T/C]GGACCCTGCAGCAATGCTTGGACCAGAGGTCAGCAGGGTAAACCTGGGCAGCCAGCTGGT	37.5	3	20164268	KAT2B	EXON
rs372141006	TTTCTTATTTTGGTACTCTTCTTTTTCATTTTCGTCAGATTCTGAAGAGCTGCTGCTACT[A/G]TCATAACTGCTGTCACTGCTGCAGTACTTTGGTCTTTTCATTATCTCAGTACTCTCAGGC	37.5	1	84376972	TTLL7/MIR548AP	EXON
rs10209158	GAGAGATGAAAGAGGACAGACCATTGAAAACTTTTAGATGCAGGAGAATTGAGACTTCCA[T/C]AAGGGAGAGAAACACAGCCTCCCCAGAATCCATTATGCCATCGGGTTGTGGCACTCTCAC	37.5	2	206483485	PARD3B	EXON
rs372582487	ATTTCAATCTAAATTTTGCATTTAGGATTCTAGGACTCTTCATCCGAGGCATTGAAGACA[A/G]CAGCAGGTCCAAGCGGGAGGGACTATTTCACGAAAATGAATGTATTGTAAAAATCAACAA	37.5	2	205983680	PARD3B	EXON
rs200838968	GGATGGCCATCCACTGTCTCCAGAAAGAGACCACTTAGAGGGTCTCTATGCCAAGGTCAA[A/C]AAGCCATACCATCCACTGGTTCCAGCTGACAGGTAATAAACTTAGTGAAAGATAAATGTA	37.5	2	206305364	PARD3B	EXON
rs111330062	CAATAATACCACTTAATTATTCATTTCCTAATGTGTGCCTTCCCTCTTCACAGTTGATGC[A/G]GCAGTTATATCATGAATGTACGCTTGTCCATGCTGACCTCAGTGAGTATAACATGCTGTG	37.5	18	21056977	RIOK3	EXON
rs191880040	TGGATTAATTGACAAGTGATTTTTTTTCCCCTCTGCTTCTTAGAAACTCACCAAGCAGTG[T/C]GCCTAAAGCAAGGTGGTTTAGTTTTTTACAAAGAATTGGACATGATGTATTGAAGAGACT	37.5	3	20194059	KAT2B	EXON
rs186162595	AACCACATTTTCAAAACAGGTCATGTGGTGTCAGGTTGGAGTGTACTTCCAGGGATAACC[A/G]TGGGACATTCTTGAAATCTGAACTATCCTGGGAAGTCTTGAAGTAATGGATGCCTATAGT	37.5	11	62440639	C11orf83	EXON
rs182457488	AACATTTTACCAAAGGGAGCAGCAATAAAAGATGGCCGCCTACAATCAGGGGACAGAATT[A/T]TGGAGGTAAGAATTGGAATTAATAGTTGTATGAAAATATTTCTTGGCATTTAAATAATGC	37.5	2	205989185	PARD3B	EXON
rs144117791	ATTATCGAAAAGTGCATCCTTATGAAGACAGCGATAGCTCTGAAGATGAGGTTGACTGGC[A/G]GGATACTCGTGATGATCCCTACAGACCAGGTACCAAAGTTTTTACTTTCTGGGGGCAGCA	37.5	18	21044248	RIOK3	EXON
rs373657180	CAAAGAGTACAACCCCCCTGAGAGTGAATACTACAAATGTGCCAATATCCTGGAGAAATT[T/C]TTCTTCAGTAAAATTAAGGAAGCTGGATTAATTGACAAGTGATTTTTTTTCCCCTCTGCT	37.5	3	20193975	KAT2B	EXON
rs183831790	TTGGGGAGGAAAAAAAATCAGAAGGAAGACGAAAGATGGGGCTATAAAAACAAAACTACC[T/C]GATAGTTGAAACGCTTTCAGAGTTGTTCAAATCAGTGAGAGTGGCAACGGAACACACAAA	37.5	2	206480774	PARD3B	EXON
rs375791980	TGCATTTTTTTAATATTTTTTCTTTTGTCTCAGAGTAGGAGGCGAGGGGG[A/T]GAAGGGTTAGCAGAAAAAGGATGTATTTACAGGGTCCACCTGACAAGACA	37.5	3	128199048	GATA2	EXON
rs201872849	GATGTTCTATCAACTCGATATGAAACCCGCTACATCTATGGCCCAATAGAATCAACAATT[T/C]GTAAGTCATTCCTCTTATTTACTGAGCCCTTTTCCCTAATTATTTTTTACAAATATTAAA	37.5	3	148603964	CPA3	EXON
rs73062236	TTTCAGAGTCAGCCCCAAATCTCCTGCCTATAATTACTTTAACTGGGGTCTCTAAGGTTC[T/C]CACTTGAGGGCTAAAATGTAGTTGGGAAAGAGGGCCTACTGGGGAGGTCTCACAGGAGGC	37.5	2	206481434	PARD3B	EXON
rs111267423	TATGTGGAATCCATATAACTTTCCTCATACCACTAACTGGTCATGATTAATTTCCTACCT[A/G]ATAATTTTGCAGCTCTGAAATTTTCTCCTGCTGAACAGCAGAATCACACCATATAAGATT	37.5	1	84415550	TTLL7	EXON
rs150351875	TGAAAGAAAACAGGCACAAATTCGAAAAGTTTACCCTGGACTTTCATGTTTTAAAGATGG[A/C]GTTCGACAGATTCCTATAGAAAGCATTCCTGGAATTAGTACGTATAGACCTTCTTTTAAA	37.5	3	20187885	KAT2B	EXON
rs368678219	TTGATACTTCATTTTTTCAATCTATACAAAAATAGCAGCACAGTTACCTATAATTCCCCA[T/C]ATGTCGATTTTCATGTTCTTCTCGTGAGATCTGCTTTCGTACTTGAGCGAGTCTCTCTTT	37.5	1	84386783	TTLL7	EXON
rs141235709	CATTAGGTGGAATGTACTTCTCTGTACCCATTCGCACAAGCCCATCATGGTAGAGAAATA[T/C]TTTTAGTGGATCACACGATGTAACCAGAATATAAATTCGTAAGTCAAACTTGTAACCTTC	37.5	1	84408217	TTLL7	EXON
rs375944042	CCATACTTTTCTCTGTTGAATATTGTTTTCCTTTCTTCTGCCTTAGGATGGTCGTCTGCG[A/C]ATGAATGACCAGCTGATTGCAGTTAATGGGGAATCTCTTTTGGGAAAGTCCAACCACGAA	37.5	2	206036949	PARD3B	EXON
rs200358438	TACTTTGATAAGTAAGGAAGGTAGAGATATACTGCACCTTTGGTCCTCGAGTCTTGGTAG[T/C]TTTTCCCATCAACTTTTCATCATCAATTTCACATTGCTCCAGAAGATCCAAAATATCTTC	37.5	1	84383310	TTLL7	EXON
rs73663115	TACCTGGAATTGATGTGAGTATGGTGTGAGACAGAACTTCAGGTTGACTTTTGGTTCTCT[A/C]TGGATACCCATTAGACCCAGTAGATATAGAACCATATTCATGGCACCAGTGACTGAAGAG	37.5	8	11241398	C8orf12	EXON
rs367683674	ACCCTTAATGAATTTAAGAATCGTGACAAATATATTAAAGATGATTTCAGGTTTAAAGAT[T/C]GCTTCAGTAAACTAAATCCACGTAAGATCATCCGCATGTGGGCAGAAAAAGAAATGCACA	37.5	18	21053520	RIOK3	EXON
rs376090236	GGCACTGTTTACAAAGCTCCACTAGGCGCTGGCAACACTGGAGCTGCAAAGGAGTCACCA[T/C]CTCCGGGCTTTTATTGAATATACTCTCCCAAGAGGATCTGTTGGCATGGAAACAGACATG	37.5	1	84348782	TTLL7/MIR548AP	EXON
rs112656705	ATTATTTTCGTCAGTGTTGTGCAGGAGAATCCACTTAGAAGCCTGGGTAAAATTGTATTA[T/C]ATGATCTTGGGTTTGGTCCCTGAGAAAGAGCCAGATTAACGCTGGCAGGAAAGAAAGCAG	37.5	8	11291498	FAM167A/C8orf12	EXON
rs149006068	CTATTTTTACGGATTGTGGCATTCACGCACGAGAATGGGTCTCCCCAGCATTCTGCCAGT[T/G]GTTTGTCTATCAGGTAAGTGAATCAGAAGACTCCCAATTCTCCTTTGACTGCCAAGTCTC	37.5	3	148597663	CPA3	EXON
rs141535428	TCCATGGGCTATTCCTCAAAATACAATATCTTGTTCTTTGGCTGATGTAATGAGTGAACA[A/G]CTGGCCAAAGAATTGCAGTTAGAAGAAGAAGCTGCCGTTTTTCCTGAAGTTGCGTAAGTA	37.5	18	21042990	RIOK3	EXON
rs369184714	CATCACTTAGAATATACAGATGGAGGAATCCTGGATCCAGATGATGTCTTGGCAGATGTT[A/G]TTGAAGATAAAGACAAGGTAGATAACTCTAAAAATGTGCCTCTTTGTTTTCCTCTACAGA	37.5	2	205550988	PARD3B	EXON
rs145690708	GTGTTATTTACTGGACTTTGTGATATTATTTTCTTAACTACACTTTACTA[T/C]GGCCCTGTTGAAAACAGACTATCAAGTTTTTTGTCTCTGTTCTGTCATCT	37.5	2	206482315	PARD3B	EXON
rs374189951	TGAATGACCAGCTGATTGCAGTTAATGGGGAATCTCTTTTGGGAAAGTCCAACCACGAAG[C/G]TATGGAAACACTTAGGCGGTCAATGTCCATGGAGGGAAACATCCGAGGGATGATCCAGTT	37.5	2	206037011	PARD3B	EXON
rs9859493	GGTTTATGGGATATTGATGGTGCTTGACTTCTCTTGTCACAGGTGGCTGTGTTACTGCAA[T/C]GTGCCACAGTTCTGCGACAGTCTACCTCGGTACGAAACCACACAGGTGTTTGGGAGAACA	37.5	3	20153106	KAT2B	EXON
rs80303579	AAAAACAAAACTACCTGATAGTTGAAACGCTTTCAGAGTTGTTCAAATCAGTGAGAGTGG[T/C]AACGGAACACACAAACAACTAATTATGGAACTCTACTCTGGGGATCCTCTCTGGCTAGAT	37.5	2	206480819	PARD3B	EXON
rs183788880	AATGCAGCTTCTATTTCACCTGAATCCTTCTCTTGCTCATTTAAGTCCCATGTTACTGCT[A/G]TTTGCTTTTACTTACTTTCAGTAGCACCATAACGAAGTAGCTTTAAGTGAAACCTTTTAA	37.5	3	148614635	CPA3	EXON
rs138279801	AAAATTGTCTGATTTACAAGCCGGTCTGATCCTTGTCTCTTTTATTTCTTCTCCTCAGTG[C/G]CAGATGAAAGCAAGGTTCACTCATTGGCTGGACAAAAATCGGGTAAGAAATTCCTTGTAA	37.5	2	206110504	PARD3B	EXON
rs200915849	TCTTCTTCAGTAAAATTAAGGAAGCTGGATTAATTGACAAGTGATTTTTTTTCCCCTCTG[T/C]TTCTTAGAAACTCACCAAGCAGTGTGCCTAAAGCAAGGTGGTTTAGTTTTTTACAAAGAA	37.5	3	20194034	KAT2B	EXON
rs376395769	AGATCAGCACATCAACTTCAGATCTGTGACACCGGCCAGGCAGCCTGAATCAATTAATTT[A/G]AAAGCCTCGAAGAGCATGGACCTTGGTAAGCAAGGGTGAGGTGACATCCAGGTCAGCTCT	37.5	2	206058019	PARD3B	EXON
rs150807042	TACCTTTCTTTGCTCCAAGTGAAGTTTGGACCCAGCAGAAAGCATTATTTTGAAAGGTGA[T/C]ATACAGTGGGGCACAGAAAACAAATGAAAACCTTCAGTTTCTCACAGATTTTCACCATGT	37.5	3	148614757	CPA3	EXON
rs191632954	TTGTGCCTTTCATCAGAAAGTCAATCTTCAGTTATCCCCAAATGCAGCTTCTATTTCACC[T/C]GAATCCTTCTCTTGCTCATTTAAGTCCCATGTTACTGCTGTTTGCTTTTACTTACTTTCA	37.5	3	148614595	CPA3	EXON
rs375706071	CTCAAGCATACTTCCTAAAGAACTGCCCTCTGTTTGGAATAAGCCAATTAATCCTTTTTT[C/G]TGCCTTTCATCAGAAAGTCAATCTTCAGTTATCCCCAAATGCAGCTTCTATTTCACCTGA	37.5	3	148614537	CPA3	EXON
rs369877041	CTGTTGAATATTGTTTTCCTTTCTTCTGCCTTAGGATGGTCGTCTGCGAATGAATGACCA[A/G]CTGATTGCAGTTAATGGGGAATCTCTTTTGGGAAAGTCCAACCACGAAGCTATGGAAACA	37.5	2	206036961	PARD3B	EXON
rs371779462	TTTTTCTTATGCGGACACTAGTACAAAATAAGTTACTTCTGGCCGTGGTG[T/C]CCCTGCAGCGACTGCCCGCCCATATTGCACTTGGTCACTACATCAGCACA	37.5	3	128198495	GATA2	EXON
rs375059681	TGTCTATATCCTGTAGTGGCCGTCCTACGGGTGGAAGCACTGACCGTATCCAGAAGTTGC[A/G]GAAAGAGTATTATCAGGCTCGGAGGGAAGGTTTCCCTTTATATGAAGACGACGAAGGAAG	37.5	2	206364664	PARD3B	EXON
rs374196354	ACCTGCTGATACCCAGCCAAGCGCTTCACACCCTGGTGGCCAGAGTCTGAAACTGGTTGT[A/T]CCAGTAGGTATCCTGCTGCTTGTAGTTCTAATGAAAGATCAAAGTGCTGTACCCATAGGT	37.5	2	205912410	PARD3B	EXON
rs199548798	TAAAAACAGTTGCCAGTGATAATCTGCATGAAGGAAAAAGAACCCTGCAAATGGCTATTG[A/C]GTTGGAAGTATTGTTTTTGATATGTAAGAGATATTCAGAATGCTCACACTGAAAATGCCT	37.5	3	20195429	KAT2B	EXON
rs183104294	AAACCTGTAACCACTGCATTCGTTTTCTTTGGAGGAACATTGTAGCATTTCAGGAGGGTC[A/G]AGAGATCTAAAGAGTTTGGTCTGAATGTGTGTCTGTACAATTCCCTTTGGCATTAAACTC	37.5	2	206484066	PARD3B	EXON
rs145785078	TTTTTTTTCATTTGCCTCCACAAAGGGAGAAGGTGTTCCGCGTGAAGCCCCAGGATGAAA[A/G]ACAAGCAGACATCATAAAGGACTTGGCCAAAACCAATGAGGTAAGCATTTAGAGGGATAT	37.5	3	148583295	CPA3	EXON
rs116686228	ATTGAAAAATGCAAACTGATCTTGTGTAAACACTTACGTCATTCAATCTGGCAGAACCGC[A/T]TGTGGAGAAAAAATCGTTCCAAGAACCAAAACTCCAAATGCATCGGCACTGACCTCAACA	37.5	3	148600298	CPA3	EXON
rs35401850	TTCAGTAAACTAAATCCACGTAAGATCATCCGCATGTGGGCAGAAAAAGAAATGCACAAT[C/G]TCGCAAGGTAAAGAAAATATTGTGCTAGACGTAATCTTGGGTAAATACCTTTTTGCATTA	37.5	18	21053583	RIOK3	EXON
rs372826480	TCTCTTGCAGGAAAAAGCAGTTGATCCTAAGACACGTTTACTTATGTATAAAATGGTCAA[T/C]TCTGGAATGTTGGAGACAATCACTGGCTGTATTAGTACAGGAAAGGAGTCTGTTGTCTTT	37.5	18	21047413	RIOK3	EXON
rs41301084	TCACATACTCACATCTTCTATCAGAAGTTCTGATTCTGCATCTGACTTTCCTGGAAACCG[A/G]ATCTTCATGTCTTTGAGAACAAATAAGGTCTGACTTGTTAGATCATCTTCTTGTTCTTTT	37.5	1	84372060	TTLL7/MIR548AP	EXON
rs188363634	ACTTTTGGTTCTCTATGGATACCCATTAGACCCAGTAGATATAGAACCATATTCATGGCA[A/C]CAGTGACTGAAGAGTCCACGCACTCCCCACTCTGCTGCAGTGTCACCGTGATCATAAATC	37.5	8	11241444	C8orf12	EXON
rs374090206	CCCCAGTGATATGACAAGAACAGTGGAGATTTCTGGGGAAGGAGGCCCATTGGGAATACA[T/C]GTAGTGCCCTTCTTTTCATCTCTGAGTGGAAGGTAAGATGTTTTTCTCATTCCAGAAGCT	37.5	2	205978269	PARD3B	EXON
rs56387307	TCAGAAGAATGGAAGGAAAGCTGCTTCATTTTTGAAAGATGATGGAGACCCACCACTACT[A/G]TATGATGAATAGCACTAATACCCACTGCTTCAGTGTTAACACAGCAGTGATTGTCAGCTG	37.5	18	21061231	RIOK3	EXON
rs189886051	TTTTTGTAAAAAACATTTTACCAAAGGGAGCAGCAATAAAAGATGGCCGCCTACAATCAG[A/G]GGACAGAATTTTGGAGGTAAGAATTGGAATTAATAGTTGTATGAAAATATTTCTTGGCAT	37.5	2	205989174	PARD3B	EXON
rs147228563	TCTTCTGCAGCCATTCCTAACACCAATGACCCATGTGCAGATAACTATCGGGGCTCTGCA[A/C]CAGAGTCCGAGAAAGAGACGAAAGCTGTCACTAATTTCATTAGAAGCCACCTGAATGAAA	37.5	3	148601450	CPA3	EXON
rs373721059	GAGAATAGCTCTGTGTAATTTTTTCCTGTCTCTTGCATCTCAGACCAATTTTCTGTCAGC[A/G]CACTCGGCCAGGGATGAGGCGGCAAGGTTGGAAGAGCGCAGGGGTGTAATTGAATTTCAC	37.5	3	20167414	KAT2B	EXON
rs370011906	TGTTTTTTTCTGCCCCAGTGATATGACAAGAACAGTGGAGATTTCTGGGGAAGGAGGCCC[A/G]TTGGGAATACATGTAGTGCCCTTCTTTTCATCTCTGAGTGGAAGGTAAGATGTTTTTCTC	37.5	2	205978257	PARD3B	EXON
rs145833901	AATCCCGGATAAAGCCAACGTGCAGAGAGACCATGCTAGCTGTCAAATTTATTGCCAAGT[A/C]TATCCTCAAGCATACTTCCTAAAGAACTGCCCTCTGTTTGGAATAAGCCAATTAATCCTT	37.5	3	148614472	CPA3	EXON
rs375792423	AATCTCACAGGAACCGATAGTCCTGAAACAGATGCATCAGCTTCCCTGCAACAAAACAAG[A/G]GTCCCCGAGTACCAAGGCTGGGAGGAAAACCATCCTCTCCCTCACTCTCGCCTCTCATGG	37.5	2	205986562	PARD3B	EXON
rs77055249	CTGACCTGCTGAATGCTACCTTCCCCTCGAGTTGAATACACCTTAAGGAAAATGATAACA[T/C]GAGGGACGTGTAACTTGTTTTGAAGCATTAAAAACCAGCAGCTCTTCACTATGTTCCATA	37.5	2	206482533	PARD3B	EXON
rs17006672	AAAAGATAATTTCCCTGCCCACAAAGGCATAAACTTGAAAACACATGAGATTGAATCAAC[A/T]TGCTTTAATAGGAAAAGATGTATGGTCTATATATGTATCAATCTGGTGAATCCTCGTTCT	37.5	3	20194845	KAT2B	EXON
rs148958408	TTCTTGTATTTCCTTACTAGTTTTTCCAGAAAGGAGGAGTCAAGGAAGCCCTTAGTGAAC[A/G]AGAACTCTTCAATGCTGTTTCAGGCTTAAACATCACAGCAGATAATGAAGCTGATTTTTT	37.5	18	21059321	RIOK3	EXON
rs191732121	AATCATATAGATGATTTCTGTTGTCTATTAAATACTTTGTTGTTTCACCTTTCAGATTTA[A/G]ACTTGCAATCTACCTGGAATTGATGTGAGTATGGTGTGAGACAGAACTTCAGGTTGACTT	37.5	8	11241327	C8orf12	EXON
rs76225547	ATACCACTTAATTATTCATTTCCTAATGTGTGCCTTCCCTCTTCACAGTTGATGCGGCAG[T/G]TATATCATGAATGTACGCTTGTCCATGCTGACCTCAGTGAGTATAACATGCTGTGGCATG	37.5	18	21056982	RIOK3	EXON
rs144694625	CTTGTTGCACCCAAGCTACGCTAGTGCCCCCATCACATGTCCCAGCACAC[A/G]CCAGAATTTACAATTTACACAGCCTTATAGTGTCAGGCTCACCAGAGACA	37.5	8	11281246	FAM167A/C8orf12	EXON
rs144531372	ATAATTCCCCATATGTCGATTTTCATGTTCTTCTCGTGAGATCTGCTTTCGTACTTGAGC[A/G]AGTCTCTCTTTCTGGAAATGAGAAAAATTTTACAAATAAAATCCAACAAGTGAATTATGC	37.5	1	84386832	TTLL7	EXON
rs369447376	TTGTTTTCCTTTCTTCTGCCTTAGGATGGTCGTCTGCGAATGAATGACCAGCTGATTGCA[A/G]TTAATGGGGAATCTCTTTTGGGAAAGTCCAACCACGAAGCTATGGAAACACTTAGGCGGT	37.5	2	206036971	PARD3B	EXON
rs185583179	TGATGAATAGCACTAATACCCACTGCTTCAGTGTTAACACAGCAGTGATTGTCAGCTGCC[A/G]ATAGCAAATGAAGTTATGGGTGACTTGAAATACCAAAACCTGAGGAGTGGGCAATGGTGC	37.5	18	21061294	RIOK3	EXON
rs199598272	TTTGCTCATTTACCTCCCTCCATATGCATGAAAGACAACAGACTCCTTTCCTGTACTAAT[A/C]CAGCCAGTGATTGTCTCCAACATTCCAGAGTTGACCATTTTATACATAAGTAAACGTGTC	37.5	18	21047443	RIOK3	EXON
rs75997373	ACACGTTTACTTATGTATAAAATGGTCAACTCTGGAATGTTGGAGACAATCACTGGCTGT[A/G]TTAGTACAGGAAAGGAGTCTGTTGTCTTTCATGCATATGGAGGGAGGTAAATGAGCAAAA	37.5	18	21047444	RIOK3	EXON
rs139521475	TTTCACTCTAACTTTCCTTTCTCTCCAGGCCAAAGTTGCAAAGATTGGCACTGATGTTCT[A/G]TCAACTCGATATGAAACCCGCTACATCTATGGCCCAATAGAATCAACAATTTGTAAGTCA	37.5	3	148603912	CPA3	EXON
rs377604272	GCTCCCTGTAATCTTGAAAGAGCAAAACAGATGACCTACCACTTGAGAGTTGGTAGAGCA[C/G]GCATCATTACTGTGAGGCAGATGCCTCATGTAGGAGGAAGCACGGTTTAAGGAATGTGAC	37.5	1	84373160	TTLL7/MIR548AP	EXON
rs75545486	AAGGGTTAGCAGAAAAAGGATGTATTTACAGGGTCCACCTGACAAGACAGGCTGTGGCTT[T/G]CGCTCAGTAAGGGGACACAGTCACAGCAGCTTCGGCCTCAAAGCCAAGGGAGCGATCTGG	37.5	3	128199111	GATA2	EXON
rs148109955	TGAGTCATGTACTTAGGGTGAATTTGAGACAATACTTAGAGGACAGCAAC[A/G]GCACGTGAGACAGGCACATCTGACATGCCTAATTTCCCCCAAGGCCCTTG	37.5	8	11281437	FAM167A/C8orf12	EXON
rs369455933	AGGCCCACCTGCTGATACCCAGCCAAGCGCTTCACACCCTGGTGGCCAGAGTCTGAAACT[A/G]GTTGTTCCAGTAGGTATCCTGCTGCTTGTAGTTCTAATGAAAGATCAAAGTGCTGTACCC	37.5	2	205912404	PARD3B	EXON
rs74341236	ACCTGTACTGTATTTTTCAGGATTGGAGCAAAACATCAGGAGCTAAGGGAAAAGCAGGCA[A/G]GAGGTCTTCTTGATTATGCTACTGGTGCAATTGGATCAGTGTATGATATGGATGATGATG	37.5	2	206305134	PARD3B	EXON
rs199773696	GCCCTTGGCCACGACTCCAGAGTAAGCGATTAAAAACCCGGTTGAAAATCCGATATAAAT[T/G]TACTTCTTCAACATCAGGCACCTTCCAGATGCGTGGAAGAACTGTACGAATACTTGTTTT	37.5	1	84356089	TTLL7/MIR548AP	EXON
rs200572606	GGAAACACAAAACCCTTGCTTTAATTAAAGATGGCCGTGTTATTGGTGGTATCTGTTTCC[A/G]TATGTTCCCATCTCAAGGATTCACAGAGATTGTCTTCTGTGCTGTAACCTCAAATGAGCA	37.5	3	20168974	KAT2B	EXON
rs112260624	CTGGGGTGGATTCAGCAGTATATTTTCCAGATCAGCACATCAACTTCAGATCTGTGACAC[T/C]GGCCAGGCAGCCTGAATCAATTAATTTGAAAGCCTCGAAGAGCATGGACCTTGGTAAGCA	37.5	2	206057991	PARD3B	EXON
rs147870914	GTCTTGGGATTCCAGTTTAGTGCTTGGATTTATTTCCTGATTACACTACA[A/T]AGAAAAGTGAGACATCTGCCATTCCCAACTCTGGGAAAACCAACTAATAT	37.5	3	20195166	KAT2B	EXON
rs374855272	TTTTCGTCAGATTCTGAAGAGCTGCTGCTACTATCATAACTGCTGTCACTGCTGCAGTAC[T/G]TTGGTCTTTTCATTATCTCAGTACTCTCAGGCATAGAACACAGAGGCTAAAAAAGATGGA	37.5	1	84377000	TTLL7/MIR548AP	EXON
rs367870749	GGGGAAGAACAGAGGCTTCACTGTAGCTATAGTTTTCCACCAAGTCAATC[A/G]ATTAAAACATGACTCATTGTCCCCTCCAAAGATTCATAAAATTCTTGAGC	37.5	2	206483839	PARD3B	EXON
rs190369628	ATAGAGCCTCCTTTGAGCCTCAGCTTTTTGTTTGGCCAAGTTTCTTCTTTTGTCACTGGT[T/C]CTAAAATATAAAACATAAGACCATATTCTAGAACTCGAACAAGTTCTGATCTTATCCCTG	37.5	1	84387077	TTLL7	EXON
rs186719182	TACGAGCAACAGAAAGACTGGTCTTAGTGCAATTAGGCAGGAGGGATTTGGACTCAGAAA[C/G]AGCCACAGAAGTATTTCTCAGCACTCCCAGTTCCTGCCAACTTAGCTGGAAACGATGCCA	37.5	2	206484255	PARD3B	EXON
rs147160135	ATTGTAGCATTTCAGGAGGGTCGAGAGATCTAAAGAGTTTGGTCTGAATG[T/C]GTGTCTGTACAATTCCCTTTGGCATTAAACTCTGAAACCTACAATCAATG	37.5	2	206484094	PARD3B	EXON
rs377395475	ATGTTGGAGACAATCACTGGCTGTATTAGTACAGGAAAGGAGTCTGTTGTCTTTCATGCA[T/C]ATGGAGGGAGGTAAATGAGCAAAATATGATACCATGATATGAAAACTTAGTCTCTTCTCC	37.5	18	21047480	RIOK3	EXON
rs116354492	ATCAGTAATGTGCCTGGGAGCAGGAAATAGCTCCCAATTTATTTATGGCCTTGGGAAAAC[T/C]CAATCCGGTGTCTCCTTGTAGCTCAGAACACTAATAGCCCCCCTGGAAGAGAGTGGCACA	37.5	2	206483225	PARD3B	EXON
rs372643726	ACCAAATTGGACTCATTAGGTGGAATGTACTTCTCTGTACCCATTCGCACAAGCCCATCA[T/C]GGTAGAGAAATATTTTTAGTGGATCACACGATGTAACCAGAATATAAATTCGTAAGTCAA	37.5	1	84408204	TTLL7	EXON
rs149343752	CTGATCCTCAAGCCTGTTGGGAGGGAGAAACTCTTAAAATCAAATCCTAC[A/G]CACTGTAGTTGACCTACACAAGTGGCTTCCGCATTTGGACAAAAATCAGT	37.5	8	11280821	FAM167A/C8orf12	EXON
rs374800491	CTCTTAAGATTGTGGCTTGGACTGAAAAGATGATGGATAAGTATCCTGAAATGGTCTCTC[A/G]TATTAAAATTGGATCTACTGTTGAAGATAATCCACTATATGTTCTGAAGGTAAAAATAAC	37.5	3	148596486	CPA3	EXON
rs192753847	TTATTGTCATTTTGTTTTCTTTTATTCTAATTTCTCAAAATTGATTTTGCTCTTAAGATT[A/G]TGGCTTGGACTGAAAAGATGATGGATAAGTATCCTGAAATGGTCTCTCGTATTAAAATTG	37.5	3	148596437	CPA3	EXON
rs186691206	ATCTGCATTTGCTATATTTCATTAGCTAAAGTCAGGTCAGGGCAGGGCCAAGGCCTCCAA[T/C]TGGCAAAGGACAGTGTTATGGCTTTAAAAAGCTGAAACCCCAACCTCTAAGTAGATCACA	37.5	2	206481828	PARD3B	EXON
rs189253196	GAGCACGTTTCCCCCAAACCCTGGACTGACTGCTTTAAGGTCCGCAAGGCGGGCCAGGGC[C/G]GAGACGCGAGTCGGATGTGGTGAACTGAAAGAACCAATAAAATCATGTTCCTCCACCCAG	37.5	11	62439790	C11orf83	EXON
rs372942971	GCATCTGGAGGCACCATCTCAACGAAGACTGCGATCTCCCAATGATGATATTTCTGGATA[T/C]AAAGAGAACTACACAAGGTAATCAGATGCAAGTTCTTTTCCTTTGGCCCCATAAAGCCTG	37.5	3	20142943	KAT2B	EXON
rs149024075	CTTATCCCCAAACATGTGTCTTGATCTTAGTTTCCACCCAGAGAATGAAG[A/C]AAGCAAGCAAGCACTGGGTTACCCAAGCAACTAAATCACTCAGTTGCATC	37.5	8	11279635	FAM167A/C8orf12	EXON
rs35656780	GATAGGATATCTTCAAATTGTTTTGTGCTTTTTTCCTTCTTCCCTTTTTTTTTTTTTTTG[T/G]TTTTTGCTTTTAGCATAGTAAACTCTCCTGTAATGAAAATGCCACAGTTTTGGCAGTGAA	37.5	6	153332035	RGS17	EXON
rs17006625	TACCTAAGAAAGGAGTCAGTCATCTAACACCTTCTTCTCCTTTTGCCGGGGCAGTTATCA[A/G]TCCACCTCCTGTGGCTGGGACAATTTCATACAATTCAACCTCATCTTCCCTTGAGCAGCC	37.5	3	20161096	KAT2B	EXON
rs2289025	AGAACTTGGAAGACAGAGAAGTTTTGAATGGTGTACAGACAGAACTACTAACTTCGCCAA[A/G]AACTAAGGACACATTGAGGTATTCTCTTTATACAGATAAGAATATCTGATTTATTTCAAT	37.5	2	205969220	PARD3B	EXON
rs2280803	CATTTGGGTCCTCTGCACCTCAGCTCCCAGCATCTGGGCCTCCTCCCTGCCTGCCTCCCC[T/C]CCTCACTCAATCTGTCTCCACTCAAGAGGCTGATGGGCAGGTCTCCCTGCTTCTTCAAAT	37.5	8	11292542	FAM167A/C8orf12	EXON
rs4858770	TAACATTTTCAGACCATGAATGAATGTTTCCATTTTTTTCTAATGGAATGTGAGAGTTTA[T/C]TTTTATTTTATTCTGAAGGACTTTAAGGAAGGGATACATGATTTTAAAAAAGCCTGTAAG	37.5	3	20194423	KAT2B	EXON
rs3749184	TGGGATTCCAGTTTAGTGCTTGGATTTATTTCCTGATTACACTACATAGAAAAGTGAGAC[A/G]TCTGCCATTCCCAACTCTGGGAAAACCAACTAATATACAACCATATAAATGAAGGCCATC	37.5	3	20195180	KAT2B	EXON
rs3021511	TGTAGTTGACCTACACAAGTGGCTTCCGCATTTGGACAAAAATCAGTTACTAACAAGTGA[A/G]CAACACATCAGTAACAGTCTTATTAAAACTAGTTGTTTAGGTCAGGCACAAAATCTCAGA	37.5	8	11280885	FAM167A/C8orf12	EXON
rs2736283	TGTGTTGCTACACAAACAGCGATCCCGAAGTCTGCCAGCAAGATAGATGGCCTGGAGTCC[A/G]GAACAGACTGGATTAGTGAAAGCTACTGCAGTGCTTTGGACACTTACTATGGTAGGTGGG	37.5	8	11225910	TDH	EXON
rs17682782	GTATCCTCAGCACTACCCACCCCCGCCAGCTCCCCAGCACAAAGGACCCTTTCGACAAGA[T/C]GTTCCGCCTTCCCCTCCCCAGCACCAAAGAATGCCAGCCTATCAGGAAACAGGCAGACCA	37.5	2	206480393	PARD3B	EXON
rs1057750	GCTTCTTTGGTCTTTCAATAATGTCTTTCCCCTTGATTATACATGATATATTCCTATTTT[A/G]GAAACTTCGAAAACTATAAAAAAGTCAAAAGAATAATATTACCACTCAGAAATAAAGATC	37.5	8	11296091	FAM167A/C8orf12	EXON
rs2572368	AGCTTTCACTAATCCAGTCTGTTCCGGACTCCAGGCCATCTATCTTGCTGGCAGACTTCG[A/G]GATCGCTGTTTGTGTAGCAACACAAGGCACATCCCAGCAACGCCACACACAAACATGTGA	37.5	8	11225874	TDH	EXON
rs4673336	AAGTCCAGACTCAGTGCCAAGCAGTAACCATCTGCACTCGGGGACAGCGAGGAGCTGACC[A/G]TGGCCTCTGATGACCAGCAGGTATTAGATGGAAGTGAATGAGAGAGAGAGAGAGAGAGAG	37.5	2	206481573	PARD3B	EXON
rs10510499	TAATGTTTATTGTCTGAGGTAAATTAAATTCCCACCAGGGTTTGCTGTCAGTATTTTAAC[A/G]CCCACATTAGTATATGCGTCCAGGGTCATAACCCCCTAAAATCCATCATGCAACCTTATT	37.5	3	20195050	KAT2B	EXON
rs11675303	CCTGTTCCATCTGTAGGGCTGCTTACTACTGGAACCTAAAACAAAACCTGTTGTTTGTAC[A/C]ATCACTTTTTCTGGTGTTTCCTGTGCTTTTGTGATTCCAAGTCTGTTCATAAGTTCTGAA	37.5	2	206484652	PARD3B	EXON
rs2270523	CCAACAAATTTCAATATTTGCCAAGGACTTACTCATAGTGCATTTTATTTTGATCCAAGG[A/C]AGACTGGATGGCTTGGGATTCCTTCTCACTAACTCGGAAATCCACCATCATATTAGCAGC	37.5	3	148586798	CPA3	EXON
rs10185378	TTGGAGCAAAACATCAGGAGCTAAGGGAAAAGCAGGCAAGAGGTCTTCTTGATTATGCTA[T/C]TGGTGCAATTGGATCAGTGTATGATATGGATGATGATGAAATGGACCCCAATTATGCCAG	37.5	2	206305156	PARD3B	EXON
rs2409764	ACGCTAGTGCCCCCATCACATGTCCCAGCACACGCCAGAATTTACAATTTACACAGCCTT[A/G]TAGTGTCAGGCTCACCAGAGACACTGGCTGCCAGCCACTGGGGCTGCGTCCCCAAGTGCC	37.5	8	11281273	FAM167A/C8orf12	EXON
rs2070744	GGGAACTGTAGTTTCCCTAGTCCCCCATGCTCCCACCAGGGCATCAAGCTCTTCCCTGGC[T/C]GGCTGACCCTGCCTCAGCCCTAGTCTCTCTGCTGACCTGCGGCCCCGGGAAGCGTGCGTC	37.5	7	150690079	NOS3
rs1801132	CCTGGCCTTGTCCCTGACGGCCGACCAGATGGTCAGTGCCTTGTTGGATGCTGAGCCCCC[C/G]ATACTCTATTCCGAGTATGATCCTACCAGACCCTTCAGTGAAGCTTCGATGATGGGCTTA	37.5	6	152265522	ESR1	EXON
rs2010963	GAAGTCGAGGAAGAGAGAGACGGGGTCAGAGAGAGCGCGCGGGCGTGCGAGCAGCGAAAG[C/G]GACAGGGGCAAAGTGAGTGACCTGCTTTTGGGGGTGACCGCCGGAGCGCGGCGTGAGCCC	37.5	6	43738350	VEGFA	EXON
rs1979277	CAGGTGGGTCCAGAGTGGGCCCGCTCCTTTAGAAGTCAGGCAGGCCAGGCAGAGGGAAGA[A/G]AGAGGCGAAGCTCTCAACCTCCTCCCGGAGAGCCTGCACGGCCGCCTGGTACTTATCCCC	37.5	17	18232096	SHMT1	EXON
rs41268673	GGGAGACCACACCGTTGCAGTCCACAGCACTGTGCATTTTCCCGTTCACCGGCAGCATTG[T/G]TGGGGACCTACTGGCTTGGCTGATGTTACTGCTGCGTCGCTCCTGGGGTCTGTGGGGCAC	37.5	2	167141109	SCN9A	EXON
rs1799750	CTCTTGAACTCACATGTTATGCCACTTAGATGAGGAAATTGTAGTTAAATAATTAGAAAG[-/G]ATATGACTTATCTCAAATCAATCCAAGATATACTGAAGTATTGTTTATGAGTAAGATATC	37.5	11	102670496	WTAPP1
rs5746849	GATCGCAGTCGAATCCCCTGCCAGAATCCTGGTCCCCCTTTATCACACCGGATCAGCCCC[A/G]AAGGGCAGGGCTTCTTGCAGCAGTTCCAGCCTTTGCTGGGGGTTTCCAGCCCTGTTGAGC	37.5	22	19942997	COMT
rs1799732	GTTGCGTTCCCGCCTCAAAACAAGGGATGGCGGAATCCCCCAACCCCTCCTACCCGTTCA[-/C]AGGCCGGGGATCGCCGAGGAGGTACAGCTCCTTTGGTGGGGGGCGGGGGCGGGGCCTGTC	37.5	11	113346251
rs1553005	GTTCAATTACAGTTGGCCCAATTCCTGGTTGTGTGATCATGGGCAAGTAACTTCACAGAG[C/G]CTCAGTGTACTCATCTTTGAAATGGGGACCACAATCTCATCTTGAAGGAATATTGTGAGA	37.5	11	14994490
rs11627241	GAAAAGATGCTCAGCATCACTAATCATTAGGAATATCAAAACCGCAATGAGATACCACTT[T/C]GTATCCACAGGGATGGCTACTAACAGACAAACAAAACAGAAAACAATAAGTTGGCACACC	37.5	14	94785451	SERPINA6
rs6269	GCGCTGACACGTCAGGCAACTGAGGCACAAGGCTGGCATTTCTGAACCTTGCCCCTCTGC[A/G]AACACAAGGGGGCGATGGTGGCACTCCAAGCAAAGGGGCGTGTGGGTGCTGCAGGAGGAG	37.5	22	19949952	COMT
rs2234693	ATTTTTTTGACACATGTTCTGTGTTGTCCATCAGTTCATCTGAGTTCCAAATGTCCCAGC[T/C]GTTTTATGCTTTGTCTCTGTTTCCCAGAGACCCTGAGTGTGGTCTAGAGTTGGGATGAGC	37.5	6	152163335	ESR1
rs4411417	AGGCAGCTTCATCAAATTAATTGACACTTCACAGGTTTCTCTACGCTCTTGAATTATTTA[T/C]ACACATGCAAAATTTGTGGTTACTTGAAAGCTTGAAAGAACACTTATAAAACTGACTGGG	37.5	14	55320563	GCH1
rs9340799	CCAAATGTCCCAGCTGTTTTATGCTTTGTCTCTGTTTCCCAGAGACCCTGAGTGTGGTCT[A/G]GAGTTGGGATGAGCATTGGTCTCTAATGGTTCTGAAATAATTGTATATTCCTGCAAAAAC	37.5	6	152163381	ESR1
rs5030977	CAGGACGTCTTTGAGAAGTACAATTGGCCAAACCGGACGGTGAGGCTCAACCGAGGCAGG[A/G]GCTACCCTGACCTGGGCCCAGTACAGAAGAGGGCTGTCCCCTGGTGGCCACAGCAGTAAC	37.5	3	50416501	CACNA2D2
rs2095019	AGCTTTGCTCACCTGCTGCTCACCCCCTGCTCTGGGGCCCAGTTCCTCACAAGCTATGGA[A/C]CGGTACTAGTCATGCTCCCAGGACTGGGAACCCCTGGTTTAAATCATAAGGGAAATCTCA	37.5	6	169564874
rs2562408	GAGTCAGCAAAGAATATGATACTTTAGTGTACAGATGAGTTGTCTTCATTTGTATCAGAA[C/G]TTTTTGTGTTGTGACAAGAGTCCTGAGTGGAAGGGACTCTGTGCTGTGCCTGCTTTGTCT	37.5	19	21709881	ZNF429
rs162502	TCTGCTAGTCTGCTCAGGCCACCGTAACAGAATATTGTACAATGGGTGGATTTAACCACC[A/G]AAGTATGTCTTCTCACAGTTCTGGAGTCCAGAAAGTCCAAGACCAAGGCTCCAGCCAATT	37.5	21	28333006	ADAMTS5
rs1420100	TGTCCAAGCCTATAGCAAATTAGTTACCACGATGCCCAGCAGTCTCCAGCACTCAGGAAT[T/G]TCCGCCAACCTTGAGATGACAGATACTGCCTACTGATGCACCCACCCACCAACTGGCCTC	37.5	2	103037002	IL18RAP
rs1879234	AGTTTGTTCTCAGTAGAATCTTGCTGAGATGGAGAGCTGCTTTTCTCTCTCATGCTTTGG[T/G]TGTCTGTTTCAGAAGGCCTATTCATATCCTGTGGTTTGTGTGAATTAGGTGGGCTGTCAC	37.5	19	21704479	ZNF429
rs11087273	ACAGCCAGCACAGTCCCTTTAAATCTGGGTCAGATCATGCCCCTCCTGTGCTGAAAATCC[T/C]CCAGTGGCTCCCATCTCACCATGGGTCAAAAGTCAACATCCATGGCCCATAAGTGAGGCA	37.5	20	1954591
rs752688	AATGTGTGACAAAATATTAGAAAAACTCGGCTTGGAGCAACAGAGAGCTAAAGAAGAAAT[T/C]AAGAGAAGACATAAAATCAAGAGAAGACATAAAAATGGCTATTGGCGTGGTGGCTCACGC	37.5	14	55311569	GCH1
rs1323042	TTCTTGGGATTTCTGGTGTCTGTATAGAAAACAGAATAGTAGATGGTAGCTGATTTTACA[A/C]AAAAAATGTGCTCTATACATTAGCTCTTTTTCCTTCTTTCCCAAGAAATACTTCACTTTA	37.5	6	154421844	OPRM1
rs1198795	CTGACATGAAATCATACCACATTAAACTGCATGTATTTATTCAGAGCTGTGGGAATCATA[T/G]AGCAAAGTTTTCCATTGCTCAAACTATCTGATTATTAAGTcatccatatacccaccaatc	37.5	11	70610111	SHANK2
rs11988795	ATGATTTATAAAAATAATATTCATGAACATATACAAAAAAATTATAAAGACTTTCAACCT[T/C]CATACTGAGAAAAGAAGGATCAACTTTTGCCATTTATCAACCAAAGGTAGGACCTGCAGA	37.5	8	72949601	TRPA1/LOC100132891
rs881	CTTCATCTGGAACCATCAGAAACACCCTCACACTGGGACTTGCAAAAAGGGTCAGTATGG[C/G]TTAGGGAAAACATTCCATCCTTGAGTCAAAAAATCTCAATTCTTCCCTATCTTTGCCACC	37.5	2	75276429	TACR1	EXON
rs6318	GATTGTTTTTTTTTTTCTTAATTTTCAGTGTGCACCTAATTGGCCTATTGGTTTGGCAAT[C/G]TGATATTTCTGTGAGCCCAGTAGCAGCTATAGTAACTGACATTTTCAATACCTCCGATGG	37.5	X	113965735	HTR2C	EXON
rs7824175	ATTTCCCAGACAGAAGCCTGTCTGATCTGTAATTGTGTGTTACCTTCCTAACATTTTTCT[C/G]TCCATCCAGAATGTGAACTGCCTTAGTGGAGAAACCCAGCCTGCCTTAATCAACACTGAA	37.5	8	54144174	OPRK1
rs2835925	GGCAAAGCCTTATATTCGCTGATATTTTTGCTGACTTTTGGAGCCTTGTTCATAAGGTGC[A/G]AGATCAGTGGAACACTTGAATGTGTGTGCAGAGCACTGTGTGAGCCCTGCTGGAAGCTTC	37.5	21	39119303	KCNJ6
rs10504152	GGAACCAAGAGCAGACAGACCCTTACAGCAGCCATTCCTTCACTGCAACCAAGTGTGCAG[T/C]GGAAACCCAGTGAGGAGGGACACAGTGTGATGGGATATGTGGAAAAGAAATGCTAAACCT	37.5	8	54130115
rs1998056	GAGCAAAGCCATGGCTGCAGCTCGCTTGTTTGGTTTGTTGAGATGCTTTGTTTTTTTAAA[C/G]GGCACATTGAACATTAGGGCAGCCAGCAGTGTTATGAGGCAATCTGGTTAGGATTTTCCA	37.5	14	94789495	SERPINA6
rs3769671	AACAGTAAGTCATTAAAGTGGCCATAATCTGTGCAGAGTTTATAAACTGACACACACACA[A/C]AAAAAATCCACACACACTTTTATTTTCCTTGGCTCCTTCCAGCCATTCTGTAAGAACCCT	37.5	2	25390153	POMC
rs1801131	AGAGCAAGTCCCCCAAGGAGGAGCTGCTGAAGATGTGGGGGGAGGAGCTGACCAGTGAAG[A/C]AAGTGTCTTTGAAGTCTTCGTTCTTTACCTCTCGGGAGAACCAAACCGGAATGGTCACAA	37.5	1	11854476	MTHFR	EXON
rs1801394	GAGGTTTCTGTTACTATATGCTACACAGCAGGGACAGGCAAAGGCCATCGCAGAAGAAAT[A/G]TGTGAGCAAGCTGTGGTACATGGATTTTCTGCAGATCTTCACTGTA	37.5	5	7870973	MTRR	EXON
rs7016778	CCACATTTCCGAAGTGCCTGCGTCAGGACCTCTGCCATGCATTCCCCAAGCTTTGTCTCA[A/T]TTCATCCTCACAGTCACTTCATGTGGTAGGTACTGGTATCCTTATTCTATAGATGAAGTG	37.5	8	54150105	OPRK1
rs151058	TTTATCCTCTATCACAGGGAATCTTTAATTTAATTTCCTTGCCATTACATCTGCTCAACA[A/G]TATACCTAATGCATCTAACAGCTTCATACCCAGACCCCTTGAATTGCTTTTTGACAACAA	37.5	21	28311572	ADAMTS5
rs6432860	GAAAAGAGTATTTAAGACAATACAGATGGTGATGGCCAGGTCAACAAATGGGTCCATCAC[A/G]ACCAGGTTGACAACATGTTTCACTTTTAACCAATATGGAGAACAGTCCCAGATTAAGAAT	37.5	2	166897864	SCN1A	EXON
rs1046914	CCGTCATGGCGTTTGGTTTATGGTGGCCGATACTAAGAGCCACTGAGGTCTGGGTTGTGT[A/G]AGGGTTAGCTACCACCCTATAACCTCCCTACCAGGTAATAAGGAGACCAAGTCTTTGATC	37.5	10	1228206	ADARB2	EXON
rs1042714	GGCAGCGCCTTCTTGCTGGCACCCAATGGAAGCCATGCGCCGGACCACGACGTCACGCAG[C/G]AAAGGGACGAGGTGTGGGTGGTGGGCATGGGCATCGTCATGTCTCTCATCGTCCTGGCCA	37.5	5	148206473	ADRB2	EXON
rs1875999	GATTTTTGTATTGCACGTTGCTTTGTGCTTGTCTTACCAGTTTCAGGTTTGTAGCACATC[A/G]AAGAATTACAAACATTTCCATTTAGAACTATGATCCTACCAATCAGGGGTTATTTTCTGC	37.5	5	76264982	CRHBP	EXON
rs12584920	TGGTCTTCAACTCTGACTGCCCCTTAGAATCACCTGGCCTCACCCTAGGCAATTAAATCA[T/G]AATGTTCCCAGGGGCATTTTATGTGTAATTGGGATTGAGTGGTTACTGGCCCTTCACTTT	37.5	13	47465037	HTR2A
rs17289394	TGCAGCCTTCTATTTTTAACACATCATGTCTCATGTAAGCCTCATAAAGGCAGGAACTGT[A/G]TCTATCTTGTTAACAGCTGGGCGCATAGTGCTTAAGTATGTTTGTTGAATGAATGCATGA	37.5	13	47473220
rs2070037	CCTTACGCCTGGCAAAACATTTCTTTTGTTAATGGCTTATGTCAAAATTTGTGTTTTGGC[T/C]CCTCTTCTGGAGCACCTCTCACACTGTACTGTCAGGATTTAGTCACATATTTCTCTGGAT	37.5	13	47467070	HTR2A
rs927544	AAATAGCATGCTCATTTAGGTCCAAGAGGAATGACAGCAAAATATATTTTCCTATGATAC[T/C]GTATCTTCTGGAAAAAAAATGCTTGAAAAAATAAATCAACTGAGTAAACCAGACTCAAAA	37.5	13	47456051	HTR2A
rs941601	CTAGCCATGGGTGCCACTCACAGAGCCACCAGAGCCTGAGTGTGCTTGCTGGAAAGAGTC[A/G]CTGGAAGTTCCCACCCCTTAGGGTGTTGTGAGCTCACCAATATCACCTGTTACTTATTTA	37.5	14	94771541	SERPINA6
rs9534511	CCGGGATGCCGGGGAAAGGGCAGGCAAATTAAATGAAATCATTCCGGTGTGGCATTTAAA[T/C]GGTCAAGTGAAGGCTGGACTTGGAATGAGTGTTACTAGCTTTGTGCAAACTGGCGCCTGC	37.5	13	47468580	HTR2A
rs1514280	CTGGAAAACAAGAACAAACAGATTAGCTTGCTGTTTACAAAGTGTTATTTTTCATTTGAA[T/C]GTCAAGTTTTTCTTTTACACTTATAGATAAGTACATTTCTGAGAACGTACCATAAAAATA	37.5	X	15586448	ACE2
rs4977338	CTGTTAATCTGCCGCACTAGGTCATAAAAGATCTCATTAACATTTATTTTGAATTTTGTA[T/G]AAGAATCTAAGAATGCACAGTTGTTCCATTGTCTTGCTAGATTTTTGACCTTCTTCCTTC	37.5	9	18718086	ADAMTSL1
rs1432622	TTTTGGAAAACACAAATATGAGGTGAGTGTATTTTGAAAACTATGTGAATATAATAGATC[T/C]TTAATTCATATTTGTGGATTTTATGGGAAATACTTGTTTTCTAAGGCATCTGTCTTGCAA	37.5	5	148203762
rs1432623	GAAGACTAACAACATATTCTAAACCACTAAGTAATTTATGTAAACTTCGCTTACAAACTA[T/C]ACTTGTGTGACACTTATATGAGCAAAAGCATTTTCATATTTCTTACTATATCATTCAATT	37.5	5	148204008
rs1042615	CTTCCGCGGCCCCGACTGGCTGTGCCGCGTGGTGAAGCACCTGCAGGTGTTCGGCATGTT[T/C]GCGTCGGCCTACATGCTGGTAGTCATGACAGCCGACCGCTACATCGCGGTGTGCCACCCG	37.5	12	63544209	AVPR1A	EXON
rs6696752	CTGTGGGTGACAGACTTGGTTCTGCTCCTCCCACTGCAGGCTTTCTCAGTGCTGGTATCC[T/C]AGATCCTGCCCAGAAGGGATGTGGGCCCTGCTCTTGGGAAGCTCCTGGTGTGATGGGGGA	37.5	1	11835935
rs234706	TCAAGATGGACAGAGGGACGCACCATCACACTGCTGCAGGATCTCATCAGCGGTGGTGTC[A/G]TAGTGAGCCAGGGGGTTGCTGGCGTTGCGGTACTGCATAGAAAGAGAGCAGAGCCCGTGA	37.5	21	44485350	CBS	EXON
rs4646312	ACTGTGACCTATCTGTCTCATCATCTTTTTCTTACTGGTTTGTGTATGTTCTTGGTAAAC[T/C]AGCCCTTGGTCTTACACATCATTTCCAAGGTACTAAGGACTCTTCAGGGGAAATACAACT	37.5	22	19948337	COMT
rs4646310	CTCAGTTATGATTATTGTCCTGATTTAGTTAACTGTTCTTCAGGGGCTCCAGGAGGACGA[A/G]TGTGTATCCTCCCATTGCTCTGTGCAGCCTCTAACCTCTAGAGTCTAGGGGTCTGGGGAG	37.5	22	19928806	TXNRD2
rs6275	CCGGTACAGCCCCATCCCACCCAGCCACCACCAGCTGACTCTCCCCGACCCGTCCCACCA[T/C]GGTCTCCACAGCACTCCCGACAGCCCCGCCAAACCAGAGAAGAATGGGCATGCCAAAGAC	37.5	11	113283477	DRD2	EXON
rs4986938	CCAGAACCCACAGTCTCAGTGACGCCTGGCCCTGAGGTGAACTGGCCCACAGAGGTCACA[A/G]GCTGAAGCGTGAACTCCAGTGTGTCAGGAGCCTGGGCTTCATCTTTCTGCTGTGTGGTCC	37.5	14	64699816	ESR2	EXON
rs324419	GCTCACCTCTTCTCTGAAGGGCAAGGGAGGCACAGTGGGGTCCAAGCGGAACATGTCCTC[A/G]CACAGCAGGGCTCGCAGGCACAGTGCCAGGCTCTCCACGTCCCGGGCCATGGGGCCCACG	37.5	1	46871986	FAAH	EXON
rs2817032	TTCCAAGGTAACAATAAAGAAGAATCACCATTAATTTCACAGGTACCCCATTCCGGGCAC[T/C]GTGCTGACCCTGATGTGGATGATCTCATTTAATCCTCCCAGCAAGCCTGTGATATTGGAA	37.5	6	35688619	FKBP5
rs3777747	ACATATTCCAGAAATTCTCCATAATTTCTGATCCACTCTTACATTCCTCTCCTTTCCAGC[A/G]CTATTATTGATCTCTTCTTCTTCTTTTGAAAATCTTTGTTCCCTCCATCTATCATTTCAG	37.5	6	35579002	FKBP5
rs7911	CTTGAAAACTTTCTGAGTTTCCCCAGAAGAGAATATGGGATTTTTTTTGACATTTTTGAC[T/C]CATTTAATAATGCTCTTGTGTTTACCTAGTATATGTAGACTTTGTCTTATGTGTGAAAAG	37.5	1	89518120	GBP1	EXON
rs2878172	TAGAGAATCTGCAATACCATCTCAGAAGAACAGGCAGATGCTAAGAGGGATGCTAATAGA[A/G]AGTGCACCTCAGCGCTGCTGAACTCTGTCCCTGCCTCCACATTACCCCAGAAGAAGGGAT	37.5	14	55373670
rs3759664	ACAAAGATACTAAGTGAGGTACTTTAAAAATGGAGAGAGTAGATAGAGATGCTTTCAGTA[T/C]GAATTTATTTTTAGTGGCAATCTTTCGTCTTCCTTTAAAAACATGTGTAAAGATTAACTA	37.5	14	55371579
rs7142517	AATAAAGGGAGCTGCTTAAATGCAAGACGCAGTGTGTCTTCCTTCACCACCCTTTGTCGG[A/C]CAGAGCCTGATATTCATACTCAGGATGTCATGAAAATGTAATTGATGAGGTCGAGGAGCC	37.5	14	55306804
rs548294	GCATTTAAACACAGTAAATGCCACCATCAGGCCCCAGCTCTTAACTCTTAGGCTCTAATA[A/G]CAGCAAGCACTGGGTAGGAACCTTCTAAAGGAAGAATAAGCATCAGCATAGGAAGATGAG	37.5	5	152868437
rs3761555	CTTCCCAAATTTCTATTCATTCTGATAATGCATAATTTCCTCCCACCCACCACTCATAGA[A/G]ATCTTTTGTCTCCATTTTGATATTTCATGGACAGGAGTGAAGGAGAAACATGAGAGTCTG	37.5	X	122316437
rs11713183	GAAAGATATGGAGGGTCATCATCTTGAGAATCACATCTAGATAACAAAGCTTACATGGGA[T/C]TATAGAATCTCCAACACTTACATCTAATTCATTAAAAATATCATCTAGGGGAGGAGAAAT	37.5	3	7078179	GRM7
rs6311	GTGAAGAGAGAACATAAATAAGGCTAGAAAACAGTATGTCCTCGGAGTGCTGTGAGTGTC[T/C]GGCACTTCCATCCAAAGCCAACAGTGTTTGTGTCCAGAGTGGAATTACTGACATTGGCCA	37.5	13	47471478
rs9534505	AAGGTGAGAAAATAGCCTGGGGAGAGTCAAACAAAAAAGATAGAGTAATATTAGTACCAC[A/G]TAAAGCAGAATTCAAGGTCCCAAACCTGTCCTTGGGGTCAGGGAGAGAAAAAGCAATTGG	37.5	13	47460744	HTR2A
rs1143634	CTGCCCTTCTGATTTTATACCTAAACAACATGTGCTCCACATTTCAGAACCTATCTTCTT[T/C]GACACATGGGATAACGAGGCTTATGTGCACGATGCACCTGTACGATCACTGAACTGCACG	37.5	2	113590390	IL1B	EXON
rs2234677	TCTGAGGTGCTCTGGAAGGAGGGGCAGCTCCACCCTGGGAGGGACTGTGGCCCAGGTACT[A/G]CCCGGGTGCTACTTTATGGGCAGCAGCTCAGTTGAGTTAGAGTCTGGAAGACCTCAGAAG	37.5	2	113875509	IL1RN	EXON
rs13306435	TTTATTCAACATTTAAACAATCCTTTTTACTTTCATTTTCCTTCAGGCAAAGAATCTAGA[A/T]GCAATAACCACCCCTGACCCAACCACAAATGCCAGCCTGCTGACGAAGCTGCAGGCACAG	37.5	7	22771039	IL6	EXON
rs1800796	GGAGACGCCTTGAAGTAACTGCACGAAATTTGAGGATGGCCAGGCAGTTCTACAACAGCC[C/G]CTCACAGGGAGAGCCAGAACACAGAAGAACTCAGATGACTGGTAGTATTACCTTCTTCAT	37.5	7	22766246
rs1800797	CAAAAAGGAGTCACACACTCCACCTGGAGACGCCTTGAAGTAACTGCACGAAATTTGAGG[A/G]TGGCCAGGCAGTTCTACAACAGCCGCTCACAGGGAGAGCCAGAACACAGAAGAACTCAGA	37.5	7	22766221
rs8129919	CTCTACTGTGTGCCCAGGATGGTTTTTCTGTCCTGTTTCCAAAGCAGTGTGAGCAGGAGG[A/G]GGTTGTAGCCTTGGGTTGACAGATGAGCGTGCTGGGTATACAATCAATATGTGTGCTCAG	37.5	21	39254540	KCNJ6
rs3780039	GCTGGACATAGCTTGAAATGCAGCCAGCTTGCAGTGATATGTTAAGGCCTAGAGGCTGTG[T/G]AGGGGAGGGGAGGCGGGCTCTGGAGGGCTTTGCCTGGCTGGGAAGGCTGGGTGGGCTAGG	37.5	8	140676664	KCNK9
rs6073643	GAGAGCTCCTGCTTTAGATTATGTAAAGCATCTGTAGAGTCAGCCAGACCTGACCTTGAA[T/C]CTTGACTCTCTTGTGTCACCTTAGGCAAGTAACATCACCTCTCTGAGCCTCTGTGAAATG	37.5	20	43728070	KCNS1
rs4499491	AGGCCCTGTGTATGACACACACCTTCACACATGCCATTCTCTCTGCTTGGAGTACTCCCC[A/C]CTGGAACCTCATTTGCTTAATTAGCAATTTATCATTTGGATGGCAGGTTAGATTGTCACT	37.5	20	43721419	KCNS1	EXON
rs2274316	CGCACAGGCGAGAGGCCAAGGACGCACACGTACTTCATGCTGGGGGACCGCAGAGCAATA[A/C]CCAGAATTCAAAGCCACAGCAAAGAGCTCACAGCCTCACTTACCAGATCTAAATGGTCCT	37.5	1	156446242	MEF2D
rs2236225	TGGTTTTGCAAAAAACACTAACCTACAAACCCTTCTGGGCCAACAAGCTTGAGTGCGATC[T/C]GGTCTGCAATGATGGAGGAATTGCCATGTGCGATGTTGGCAAACGGGCCAGCATGGACAA	37.5	14	64908845	MTHFD1	EXON
rs1799983	CTGGACCCCAGGAAACGGTCGCTTCGACGTGCTGCCCCTGCTGCTGCAGGCCCCAGATGA[T/G]CCCCCAGAACTCTTCCTTCTGCCCCCCGAGCTGGTCCTTGAGGTGCCCCTGGAGCACCCC	37.5	7	150696111	NOS3	EXON
rs3918226	CTGCGGCCCCGGGAAGCGTGCGTCACTGAATGACAGGGTGGGGGTGGAGGCACTGGAAGG[T/C]AGCTTCCTGCTCTTTTGTGTCCCCCACTTGAGTCATGGGGGTGTGGGGGTTCCAGGAAAT	37.5	7	150690176	NOS3
rs563649	ATTTTTTTAATAAGAAGAAGTTTCTCCCCAAAAGAGAAAATAACTTTTGCTAGATTCACC[A/G]TTGGTTATAGACCTGCATGATCTAAAGACATGCTTCATTGCATTTGCCACTTTCCTACCC	37.5	6	154407967	OPRM1	EXON
rs9479757	TGTTCATGGCTACAACAAAATACAGGCAAGGTGAGTGATGTTACCAGCCTGAGGGAAGGA[A/G]GGTTCACAGCCTGATATGTTGGTGATGTCATAAGCAAAGCAGTATTTATGGAGTGCCCCA	37.5	6	154411344	OPRM1
rs5277	GGGATTTTGGAACGTTGTGAATAACATTCCCTTCCTTCGAAATGCAATTATGAGTTATGT[C/G]TTGACATGTAAGTACAAGTGTCTTTCTAAGGTTTTTAGCCTTCTCAAAGAAAAATATGCT	37.5	1	186648197	PTGS2	EXON
rs20417	ATTAACTATTTACAGGGTAACTGCTTAGGACCAGTATTATGAGGAGAATTTACCTTTCCC[C/G]CCTCTCTTTCCAAGAAACAAGGAGGGGGTGAAGGTACGGAGAACAGTATTTCTTCTGTTG	37.5	1	186650321
rs10512405	TGCTTGTTTTTAGGATCACAGGATCACATGTGCCACCTGCCCATGCTTTTTTCTCAAGAA[T/C]TGCCATTTGGACCCTTATTAGGTGACAAATATCGCTCATCTCATAGACTTGTGATGACAA	37.5	9	113236797	SVEP1
rs1570360	CGGGCTGCGGGCCAGGCTTCACTGAGCGTCCGCAGAGCCCGGGCCCGAGCCGCGTGTGGA[A/G]GGGCTGAGGCTCGCCTGTCCCCGCCCCCCGGGGCGGGCCGGGGGCGGGGTCCCGGCGGGG	37.5	6	43737830
rs699947	TTCCCATTCTCAGTCCATGCCTCCACAGAGGCTATGCCAGCTGTAGGCCAGACCCTGGCA[A/C]GATCTGGGTGGATAATCAGACTGACTGGTCCCACTCTTCCCACAGGCCTCAGAGCCCCAA	37.5	6	43736389
rs887200	CTGGCTGGATGGTAGGTGGATACAAGCCAAGAAACTGAAGGCTGACCAGGACAAGACTCA[T/C]TTGGGTCACACAGTAAGGCAGAACTAGGGGGAAACTCCCCCAGCTGGGGTCAGGACATTG	37.5	22	19963666	ARVCF
rs6425412	GTATAATATCCATTAATATTCCCCACATACGTTCACCAAACAGTGTCTCAGCATCAATAA[A/G]TAATTTCAATAATTAAAAAGTGTGATTTTCGCAGTTTAACTATTTCCTGCTCAAAGACTG	37.5	1	177073727	ASTN1
rs165774	CCCACCTGGTGCTCGCTCACCTGCAGCTCTCCCAGAAACTGGACACTGCTGTTAGCAGCC[A/G]GACTAGGAGCACGAGGGGCACAGCCCCCATGCCTGGCTAGGTAGGGCCGCTGGACCCTGG	37.5	22	19952561	COMT
rs2020917	CTCTGTGCAGCCTCTAACCTCTAGAGTCTAGGGGTCTGGGGAGAAGTTGGGAAGTCTGGC[T/C]AGTGGGGCCGGTGCCTGGTGACCTCGGGAGGTGGGATATCATCATCTTCAGAACTGTAGT	37.5	22	19928884	TXNRD2
rs737865	CTACGGTCCCTCAGGCTTGGAGGGTCACTTTAAACAATAAAAAGCAACAGGACACAAAAA[T/C]CCCTGGCTGGAAAAATCCAAAAAGCAGGTCTGTTAGCAGGGCAGGCCCGGAGTGACTTCC	37.5	22	19930121	COMT
rs17461905	TCCCAATTCCAAAGCTACACAAGGTGTTGCTTCTGCCATACCTGGACATAGCTACCACCA[T/C]ATGCATTCTGACTTCCCTCCTTCCACACCTCACTATTACCTGCCTGAAATGGCCTTTATC	37.5	4	47369065	GABRB1
rs4694846	GGTAGACTTTTTCATGAGATGACATTCGTAATTTTCCTCCAAGTTTAGTTTCCATTATGA[T/C]GAAAAGTTGCAAGGTTTTCACTGTCATGGAAGAATTAAAACTGTGACTTAAGCTTCACAA	37.5	4	47368798	GABRB1
rs6290	GATTGATATTTATCTGATGGGTTGCTTTGTGTTTGTGTTCCTGGCTCTGCTGGAGTATGC[T/C]TTTGTAAATTACATCTTCTTTGGGAAAGGCCCTCAGAAAAAGGGAGCTAGCAAACAAGAC	37.5	4	47408838	GABRB1	EXON
rs6813436	ACTGGAAACTGTGAGCAGAAAAAAGTTCCTAAGACTGAGCATACCCTGGGAAGGACCAGA[A/G]CCTGGAGAATAAAAGAAAGGGAGCATGAAAAGTGTTCTCAAAGATGGGAGGTGTTATTAT	37.5	4	47390820	GABRB1
rs4906902	TATATTAGTAAATACCTAAATCTAGATCCTAAATCTCACGTTGGCATGTTTCTGTGCATT[A/G]ATTTTAAATATACTGCCTTTTTAAAAAATCAGCTATTTTATTTTTGGAACAGAAAATGTG	37.5	15	27019768
rs12147422	CCTGGAAACAGGGATTTATGGCATTCTGTTTCCTACGGTTGGTCACAACCACAAACAAAA[T/C]GAAAGCAGCCTCCACAAGTTAAAGGTTTGTCTACAACAACACCACACAATGTCAGTTTTC	37.5	14	55344015	GCH1
rs9671371	TGGCTGCAGCCAAGCCACTAACTCTCTCTATCCTCTTGAACAAGTCACAGGCTTTCTGTG[T/C]CTAATTTGCTCACCAATAGATTCCCTTTCAAAGATTCCTTCATTATCAATTGCAGGATTT	37.5	14	55328635	GCH1
rs998259	AGGAGGCTGAAGAGCTTCCTAGGGCCTTGCCTGTCAGCTGCTGGAAGTCAACAGAGTGAG[T/C]GATGACAATTCTGACAGGCCCACCCATGCTCAGAGACCTCGGCATGACAATTTAACTCCT	37.5	14	55355031	GCH1
rs1391950	TATAGTGGCAATCATGAGGATTAAAATGAATACGTCACATATTGTACTTCGAATGTTGGC[A/G]CTATACCATGTATTTAATAAAGGTGGTTTTATTTTATTATTACTACCATTATGCACAAGT	37.5	3	7058417	GRM7
rs3782025	GAAAGAGATCAATCTAATTCCGAATGTGTGTGTGGAGAGCTCCTTGGAGATGGAATAGGC[T/C]CCAAGGTTAGCCTGTAATTGCCTCCTTGATGGTAGACCCCACCAGTACTCAGTTTTGCAT	37.5	11	113807607	HTR3B
rs1518110	ACTGTTGAATCCTCTGTTTTTAAAACTCCCCTTTTGATTTTTTTGGGCCAGAGCCAATTT[T/G]ATTTAAAAAAAAAAATCTCTAAATGAAAGGGCATCAAAAAGACCGCATTTCAGTTATTTC	37.5	1	206944861	IL10
rs3024491	ATTTTGAAGGGAAAGCAGAAGCTTGACTCAGTCCTGGTCTTCTTTCTGCGGAGCTACATT[A/C]GGCTTTAAGGGACACCTATGTCAACCCTTCGGGGCCTTGAGCCCCCCTCATGTCCTGTTC	37.5	1	206945046	IL10
rs3024498	TGTTTTCCCTGACCTCCCTCTAATTTATCTTGTCTCTGGGCTTGGGGCTTCCTAACTGCT[A/G]CAAATACTCTTAGGAAGAGAAACCAGGGAGCCCCTTTGATGATTAATTCACCTTCCAGTG	37.5	1	206941529	IL10	EXON
rs2211843	CTGGTTAATATGGCAATGCAGACCTAGGGAATATGGAGAGGTGGTTATGCAATGAAAGGG[T/G]AGACATGGGAAACACACCAGAAGACATAACATTGGAAAAACATTTGGCAAACATAAAGCC	37.5	21	39184185	KCNJ6
rs2835930	GAGCTGGGGCATGGGGTCATTTTCAGGTGACAGGTGGGGTAACAGCCACAGGTATGCAAA[A/C]TTCCTTCTAGCTGGTCTCGAGGGCATCTTTGCTCAGAGGGGGCAGAAGGAAGTAGCACTG	37.5	21	39121501	KCNJ6
rs6517442	TTATTTTATTCTACATACATACATTTTAATTACCTAGCAATTCAGGTCCCCTCAAGAATG[T/C]TGTCTGCCCTCTAAAAATGACTGTAATATGGAGAGGTGTTTGTGTCAATTTGCATCCAAA	37.5	21	39289946
rs1543754	GGAAGTAAGTTAAAACACTGTGGAAACAGAGATCAGAGAAAGGGGCACTGGGGAGGGTAT[C/G]GGCAACATTACATTTCAATTTGTCTTGGGTGTAGAGCAGGATGGGTTAGCCCAAGGTAAT	37.5	21	39094107	KCNJ6
rs2070995	CTCAATAGAGACAGAAACCACCATTGGTTATGGCTACCGGGTCATCACAGATAAATGCCC[A/G]GAGGGAATTATTCTTCTCTTAATCCAATCTGTGTTGGGGTCCATTGTCAATGCATTCATG	37.5	21	39086965	KCNJ6	EXON
rs4845663	TGACTGAAACTTGTTATGCAGTGCATGACTGTAACTTCAAGGAGTTACACAGGTTGAAAT[T/C]AGGCTGAGTGATGATCAGATCACTATCGGAGAACCTGCAAGCCAGCCCTTGACTGAAGGT	37.5	1	154692088	KCNN3
rs7532286	TCAGTTCAATATAATAATTATTAAGAATCAACAAGGTTAGGCCATTGTGGGTATATAAAT[A/C]TGAATCAAACACATGTCCCATGAATCAGTGCACAATCTCAAGTAGTTCTAGCAAAAGACA	37.5	1	154750816	KCNN3
rs2203834	ATCCCTGCCATTTCGTTATGGTCTGGTGAGGTTCAGTCTTTGTAGGGGAGCTATAGGATG[T/G]AGTAGTAGTTCAGAAAAGGATTTTTCTAGACCTATAGTCCCAAAGTCAAGTCTCAGCTGT	37.5	8	12824893	KIAA1456
rs7079024	GGGGAGCCAGGCTTTTCATCCAGCTACTGTCACCCCAGCCTTTTGGCTGGCCGAAGTCCA[T/C]GGCCTCCAGTCAGCCAGTTACCAACATACAGGGTAAGCCGAAGGGCTCTGCCGCCTGAGG	37.5	10	3445668
rs11127292	GGGCCACGTCATATGGCATAGGGTGAAGCCGTAAAAATGTGTTTTTAAGTTTTAAGAGGT[A/G]TGTTTAATGGGGACAGTAACACCTAGGCCACAGTTTTATTATAATTGTTAAATAAAGCTT	37.5	2	2029943	MYT1L
rs1800783	TGAGTCATCCTTGGTCATGCACATTTCAAATGGTGGCTTAATATGGAAGCCAGACTTGGG[A/T]TCTGTTGTCTCCTCCAGCATGGTAGAAGATGCCTGAAAAGTAGGGGCTGGATCCCATCCC	37.5	7	150689397	NOS3
rs1042114	CCGGCGCCGAGCTGCAGCCCCCGCTCTTCGCCAACGCCTCGGACGCCTACCCTAGCGCCT[T/G]CCCCAGCGCTGGCGCCAATGCGTCGGGGCCGCCAGGCGCGCGGAGCGCCTCGTCCCTCGC	37.5	1	29138975	OPRD1	EXON
rs3798683	GTCCTAAACCCTCTAATTACTATTATTAAAGCACTTTCTTGACATTTTAATCAAAATAGC[A/G]GGTCAAGAAGTTAGGAGATGCTCTGTATTTGGTTTAACTGTGAACTATATTATCCCCAGC	37.5	6	154418414	OPRM1
rs4870266	ATAACAAAGTACCATAGCCTGGGTGGCTTACAAACTACAGAAATTTACTCTTACAGTGCT[A/G]GAGGCTTGAGGAGTTCATGATGAAAGCACCAGCAGATTCTGCATTTGCTGAGGACCTTCT	37.5	6	154368998	OPRM1
rs548646	CTCTTATTTAAACTGTACCTTCATCTCCAAAGTAGCACATTTACTGTTTTGTCTAACCTG[T/C]CTAGCCATTTCAGTCAAGCTGATTGACATGAATGTTTTCACCAAATGAGTTATGTGTTTT	37.5	6	154418147	OPRM1
rs3842803	GGAGATGGCAGCAGAGTTGGAGGAATTGTATGGAGACATTGATGCGTTGGAGTTCTACCC[T/C]GGACTGCTTCTTGAAAAGTGCCATCCAAACTCTATCTTTGGGGAGAGTATGATAGAGATT	37.5	9	125154535	PTGS1	EXON
rs689466	ATGCTCCTCCCTGAGCACTACCCATGATAGATGTTAAACAAAAGCAAAGATGAAATTCCA[A/G]CTGTCAAAATCTCCCTTCCATCTAATTAATTCCTCATCCAACTATGTTCCAAAACGAGAA	37.5	1	186650751
rs7104613	ATGCAGCCTGTGTGACCGGAGACTCGCAGAGTGGTGGGAAATGAGCCAGTCAACAGGCAG[T/C]AACCTCATGGTGTGAAAGGGCCTCCCCGAGAGAAGCACAGGGCGGAGTTGGGCAGGTACC	37.5	11	14079931	SPON1
rs4379368	TGAGCAGAAATATCCGTTTAAGAACTTGGTTACTTTGGATGGTATTGACTTTTACATCAC[T/C]GAAGGTGTTTCCATAGATGGAAGACAGCCACACTGTGGGGATTCTGGAATTAGATTTCAG	37.5	7	40466200	C7orf10
